# Supplementary material
Source: PubMed Central journal article supplement (PMC3953448)
Supplement: NIHMS559332-supplement-Supplemental_Material.pdf [file NIHMS559332-supplement-Supplemental_Material.pdf]

# Online-Figure I

HUVEC

BAEC

Vehicle

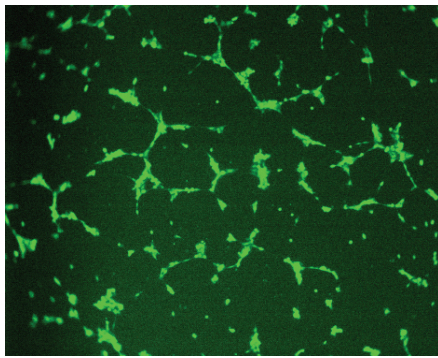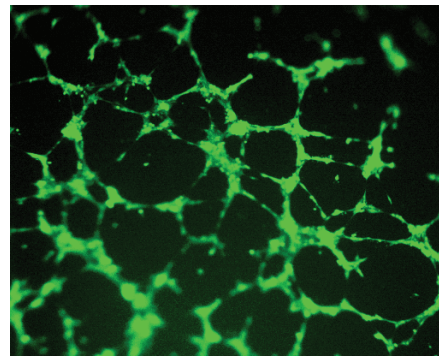

2-BP  
(20  $\mu$ M)

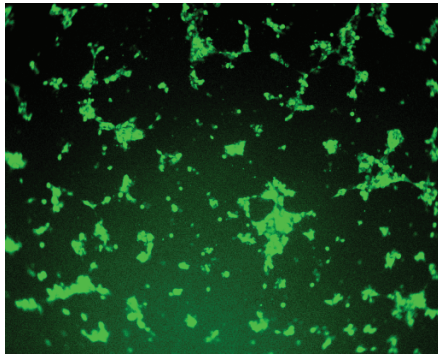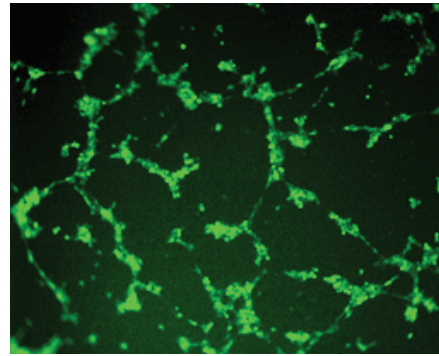

2-BP  
(50  $\mu$ M)

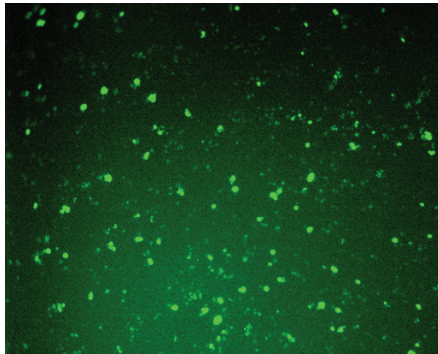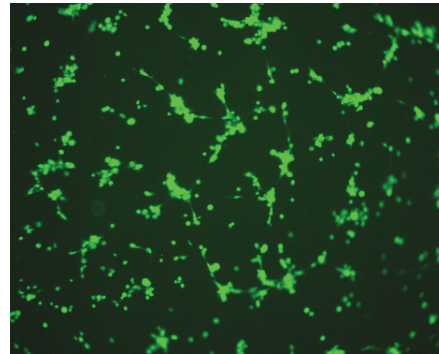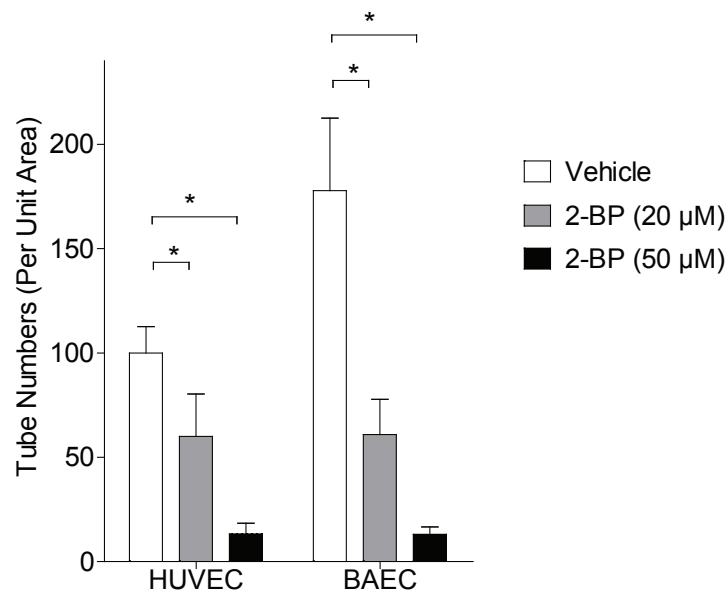

Figure I. HUVEC or BAEC were treated with vehicle or 2-BP (20  $\mu$ M or 50  $\mu$ M) and plated on Matrigel in the presence of EBM-2 media containing 5% FBS. Representative images (3 experiments) are shown, and quantification of tube numbers is presented in the bottom panel. \*indicates  $P < 0.05$ .

## Online-Figure II

### shRNA Lentiviral Knockdown

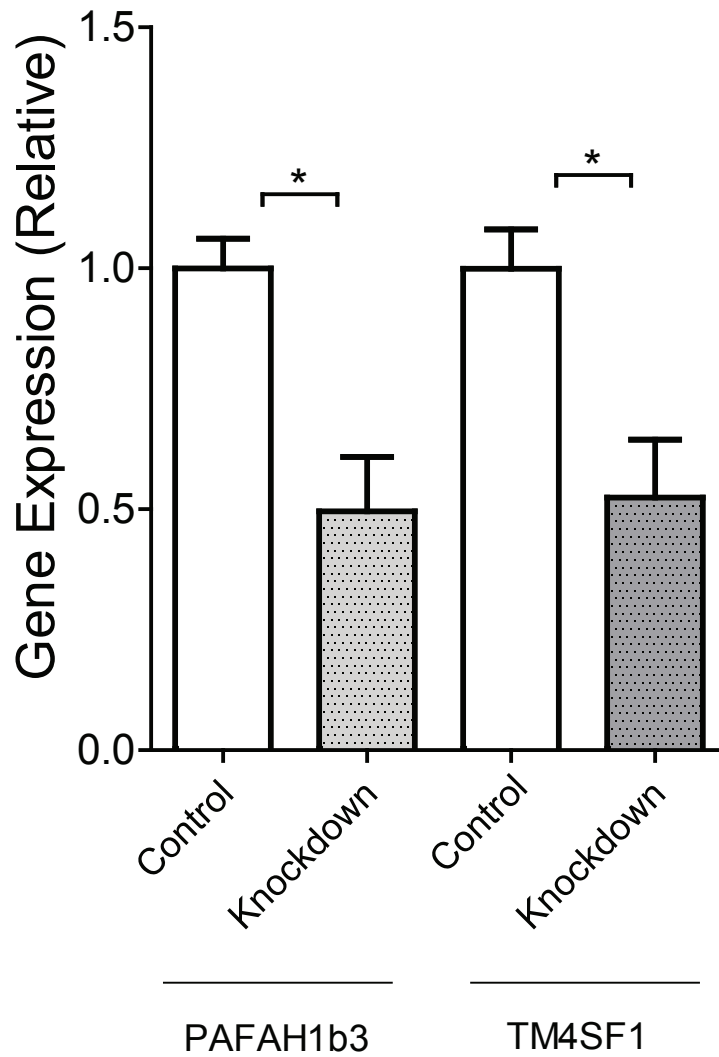

Figure II. Relative gene expression determined by qRT-PCR in HUVEC cells that were treated with lentiviral shRNA knockdown for PAFAH1b3 or TM4SF1 (n=3 or 4). \*indicates P<0.05.

## Online-Figure III

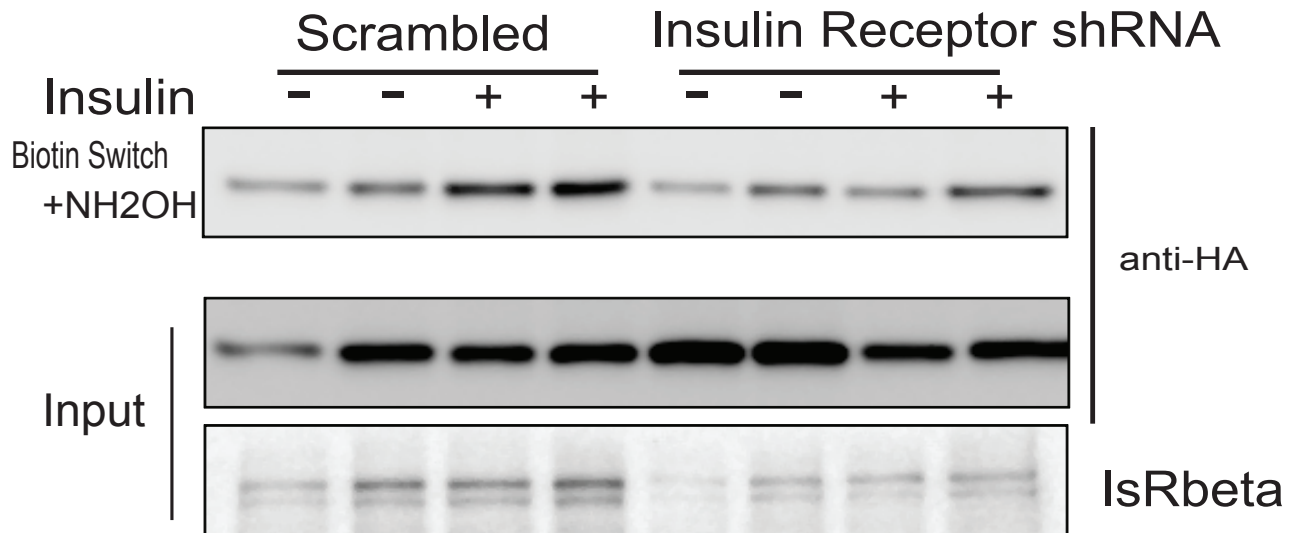

Figure III. Biotin switch assay for palmitoylation of HA-PAFAH1b3 protein in 293 cells that were treated with lentiviral shRNA knockdown for the insulin receptor. These results are representative of 3 independent experiments. The top panel is tagged PAFAH1b3 that is palmitoylated, the middle panel is total tagged PAFAH1b3, and the bottom panel is the beta subunit of the insulin receptor.

# Online-Figure IV

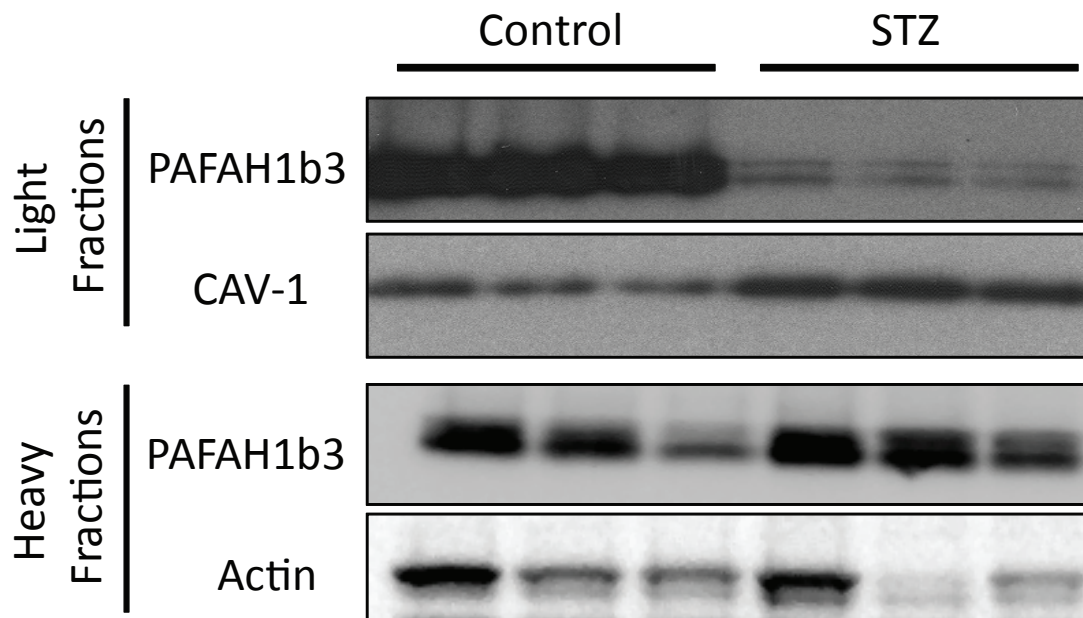

Figure IV. Detergent-resistant membrane localization (light fractions) of PAFAH1b3 protein in the skeletal muscle tissue from control or mice with STZ-induced diabetes.

Online-Table I

Palmitoylation candidates.

G protein associated regulators

RhoA activator C11orf59, **Gα-11**, **Gα-13**, Gα-14, Gai-2, **Gα(o)**, **Gαq**, Ral-A, Ral-B, **Rap-2b**, **Rap-2c**, **H-ras**, **N-Ras**, RhoJ, **R-Ras**, R-Ras2, Rab-18

HLA class I histocompatibility antigens

B-8 α chain, B-18 α chain, B-41 α chain, B-45 α chain, Cw-3 α chain, Cw-7 α chain, Cw15 α chain, Cw-17 α chain

Transporters

Neutral amino acid transporter B(0), **Cation-dependent mannose-6-phosphate receptor**, **Phospholipid scramblase 1**, **Phospholipid scramblase 3**, PTTG-binding factor

Metabolism

Aldehyde dehydrogenase family 1 member B1, Cytochrome c, Gpx1, Gpx8, PPOX, Peroxiredoxin-6, 3-mercaptopyruvate sulfurtransferase, **Thioredoxin-related transmembrane protein 1**, Thioredoxin reductase 1, **eNOS**

Chaperones

**Calnexin**, Serpin H1, AUP1, **DnaJ homolog subfamily C member 5**

Proteases, phosphatases or glycosylation enzymes

Calpain-5, Dual specificity protein phosphatase 23, **Endothelin-converting enzyme 1**, Polypeptide N-acetylgalactosaminyltransferase 1, D-glucuronyl C5-epimerase, ER α-1,2-mannosidase, Malectin, **MMP-14**

Scaffold proteins

**Caveolin-1**, Caveolin-2, **Flotillin-1**, **Flotillin-2**, Nuclear mitotic apparatus protein 1, PDZ and LIM domain protein 1

Cytoskeleton-associated proteins

**Cytoskeleton-associated protein 4**, Peripherin, Plectin, Dynactin subunit 1

Vesicular or membrane protein trafficking

**Golga7**, Reticulon-1, Reticulon-4, SCAM-1, SCAM-2, SCAM-3, **SNAP-23**, Stomatin-like protein 3, **Stomatin**, Syntaxin-12, TM4SF1, **Trafficking protein particle complex subunit 3**, VAMP-3, VAMP-4, VAMP-5, Myoferlin

Cell adhesion or ECM interactions

**CD151**, **CD44**, **CD81**, **CD9**, Claudin-11, p120 catenin, Endoglin, Ig1, ICAM-2, Integrin-α3, Integrin-α6, JAM-3, LYRIC, Mucin 18, **CD31**, FBLN3

Receptors

Endothelial protein C receptor, Prostaglandin F2 receptor negative regulator, IFITM1, **IFITM3**, IL-6Rβ, Neuropilin-1, Poliovirus receptor, Receptor expression-enhancing protein 5, **CD36**, **Transferrin receptor protein 1**, Tumor necrosis factor receptor superfamily member 12A

Transcription, translation regulators

Enhancer of polycomb homolog 1, Mediator of DNA damage checkpoint protein 1, Histone acetyltransferase MYST4, Zinc finger protein 806

Others

FAM176A, FAM49A, FAM49B, Palmitoyltransferase ZDHHC13

Proteins are grouped based on functional characteristics. Known palmitoylated proteins are shown in bold.

## Online-Table II

M and H represent proteins identified in prior screens with medium or high confidence, respectively. Y represents known palmitoylated protein with references as noted.

|            |                                                                                                   |               |            |          | Prior Screen |        |         |                        |                      |                                  |            |  |
|------------|---------------------------------------------------------------------------------------------------|---------------|------------|----------|--------------|--------|---------|------------------------|----------------------|----------------------------------|------------|--|
|            |                                                                                                   |               |            |          | Reference #  | 18     | 12      | 13                     |                      |                                  |            |  |
|            |                                                                                                   |               |            |          | Cells        | Du-145 | Jurkat  | Neuron                 |                      |                                  |            |  |
|            |                                                                                                   |               |            |          | Method       | ABE    | 17-ODYA | ABE                    |                      |                                  |            |  |
| Protein ID | Protein Name and Description                                                                      | Ratio (+/-HA) | STDEV(+/-) | #Peptide |              |        |         | Location               | Known Palmitoylation | Function Class                   | References |  |
| 1A02_HUMAN | HLA class I histocompatibility antigen, A-2 alpha chain<br>OS=Homo sapiens GN=HLA-A<br>PE=1 SV=1  | 5.57          | 2.6585     | 27       |              |        | H       | Cell surface, membrane |                      | Receptor, cell surface molecules |            |  |
| 1A30_HUMAN | HLA class I histocompatibility antigen, A-30 alpha chain<br>OS=Homo sapiens GN=HLA-A<br>PE=1 SV=2 | 7.7           | 5.5207     | 28       |              |        |         | Cell surface, membrane |                      | Receptor, cell surface molecules |            |  |
| 1A34_HUMAN | HLA class I histocompatibility antigen, A-34 alpha chain<br>OS=Homo sapiens GN=HLA-A<br>PE=1 SV=1 | 8.39          | 4.8964     | 35       |              |        |         | Cell surface, membrane |                      | Receptor, cell surface molecules |            |  |
| 1A69_HUMAN | HLA class I histocompatibility antigen, A-69 alpha chain<br>OS=Homo sapiens GN=HLA-A<br>PE=1 SV=2 | 6.75          | 3.909      | 29       |              |        |         | Cell surface, membrane |                      | Receptor, cell surface molecules |            |  |
| 1B07_HUMAN | HLA class I histocompatibility antigen, B-7 alpha chain<br>OS=Homo sapiens GN=HLA-B<br>PE=1 SV=3  | 20.16         | 7.4789     | 51       |              |        |         | Cell surface, membrane |                      | Receptor, cell surface molecules |            |  |
| 1B08_HUMAN | HLA class I histocompatibility antigen, B-8 alpha chain<br>OS=Homo sapiens GN=HLA-B<br>PE=1 SV=1  | 22.51         | 4.4411     | 42       |              |        |         | Cell surface, membrane |                      | Receptor, cell surface molecules |            |  |
| 1B15_HUMAN | HLA class I histocompatibility antigen, B-15 alpha chain<br>OS=Homo sapiens GN=HLA-B<br>PE=1 SV=2 | 21.64         | 10.7281    | 42       |              |        |         | Cell surface, membrane |                      | Receptor, cell surface molecules |            |  |
| 1B18_HUMAN | HLA class I histocompatibility antigen, B-18 alpha chain<br>OS=Homo sapiens GN=HLA-B<br>PE=1 SV=1 | 22.69         | 4.5144     | 43       |              |        |         | Cell surface, membrane |                      | Receptor, cell surface molecules |            |  |
| 1B27_HUMAN | HLA class I histocompatibility antigen, B-27 alpha chain<br>OS=Homo sapiens GN=HLA-B<br>PE=1 SV=2 | 27.52         | 10.9047    | 33       |              |        |         | Cell surface, membrane |                      | Receptor, cell surface molecules |            |  |
| 1B35_HUMAN | HLA class I histocompatibility antigen, B-35 alpha chain<br>OS=Homo sapiens GN=HLA-B<br>PE=1 SV=1 | 20.07         | 9.9713     | 43       |              |        |         | Cell surface, membrane |                      | Receptor, cell surface molecules |            |  |
| 1B37_HUMAN | HLA class I histocompatibility antigen, B-37 alpha chain<br>OS=Homo sapiens GN=HLA-B<br>PE=2 SV=1 | 25.38         | 10.9477    | 32       |              |        |         | Cell surface, membrane |                      | Receptor, cell surface molecules |            |  |
| 1B38_HUMAN | HLA class I histocompatibility antigen, B-38 alpha chain<br>OS=Homo sapiens GN=HLA-B<br>PE=2 SV=1 | 24.42         | 9.3742     | 36       |              |        |         | Cell surface, membrane |                      | Receptor, cell surface molecules |            |  |
| 1B40_HUMAN | HLA class I histocompatibility antigen, B-40 alpha chain<br>OS=Homo sapiens GN=HLA-B<br>PE=1 SV=1 | 21.71         | 8.2768     | 52       |              |        |         | Cell surface, membrane |                      | Receptor, cell surface molecules |            |  |
| 1B41_HUMAN | HLA class I histocompatibility antigen, B-41 alpha chain<br>OS=Homo sapiens GN=HLA-B<br>PE=1 SV=1 | 20.78         | 2.4254     | 56       |              |        |         | Cell surface, membrane |                      | Receptor, cell surface molecules |            |  |
| 1B44_HUMAN | HLA class I histocompatibility antigen, B-44 alpha chain<br>OS=Homo sapiens GN=HLA-B<br>PE=1 SV=1 | 25.1          | 9.9429     | 27       | M            |        | H       | Cell surface, membrane |                      | Receptor, cell surface molecules |            |  |
| 1B45_HUMAN | HLA class I histocompatibility antigen, B-45 alpha chain                                          | 5.95          | 3.8605     | 9        |              |        |         | Cell surface, membrane |                      | Receptor, cell surface molecules |            |  |
| 1B47_HUMAN | HLA class I histocompatibility antigen, B-47 alpha chain<br>OS=Homo sapiens GN=HLA-B<br>PE=2 SV=1 | 27.52         | 2.0725     | 35       |              |        |         | Cell surface, membrane |                      | Receptor, cell surface molecules |            |  |
| 1B48_HUMAN | HLA class I histocompatibility antigen, B-48 alpha chain<br>OS=Homo sapiens GN=HLA-B<br>PE=1 SV=1 | 22.86         | 4.8256     | 46       |              |        |         | Cell surface, membrane |                      | Receptor, cell surface molecules |            |  |
| 1B49_HUMAN | HLA class I histocompatibility antigen, B-49 alpha chain<br>OS=Homo sapiens GN=HLA-B<br>PE=2 SV=2 | 26.73         | 10.9244    | 37       |              |        |         | Cell surface, membrane |                      | Receptor, cell surface molecules |            |  |

|             |                                                                                                    |               |            | Prior Screen |        |         |         |                        |                      |                                                |            |  |  |
|-------------|----------------------------------------------------------------------------------------------------|---------------|------------|--------------|--------|---------|---------|------------------------|----------------------|------------------------------------------------|------------|--|--|
|             |                                                                                                    |               |            | Reference #  | 18     | 12      | 13      |                        |                      |                                                |            |  |  |
|             |                                                                                                    |               |            | Cells        | Du-145 | Jurkat  | Neuro n |                        |                      |                                                |            |  |  |
|             |                                                                                                    |               |            | Method       | ABE    | 17-ODYA | ABE     |                        |                      |                                                |            |  |  |
| Protein ID  | Protein Name and Description                                                                       | Ratio (+/-HA) | STDEV(+/-) | #Peptide     |        |         |         | Location               | Known Palmitoylation | Function Class                                 | References |  |  |
| 1B51_HUMAN  | HLA class I histocompatibility antigen, B-51 alpha chain OS=Homo sapiens GN=HLA-B PE=1 SV=1        | 22.67         | 10.0964    | 33           |        |         |         | Cell surface, membrane |                      | Receptor, cell surface molecules               |            |  |  |
| 1B54_HUMAN  | HLA class I histocompatibility antigen, B-54 alpha chain OS=Homo sapiens GN=HLA-B PE=2 SV=1        | 22.92         | 10.602     | 36           |        |         |         | Cell surface, membrane |                      | Receptor, cell surface molecules               |            |  |  |
| 1B55_HUMAN  | HLA class I histocompatibility antigen, B-55 alpha chain OS=Homo sapiens GN=HLA-B PE=1 SV=1        | 23.59         | 10.9688    | 35           |        |         |         | Cell surface, membrane |                      | Receptor, cell surface molecules               |            |  |  |
| 1B57_HUMAN  | HLA class I histocompatibility antigen, B-57 alpha chain OS=Homo sapiens GN=HLA-B PE=1 SV=1        | 22.58         | 11.8872    | 35           |        |         |         | Cell surface, membrane |                      | Receptor, cell surface molecules               |            |  |  |
| 1B58_HUMAN  | HLA class I histocompatibility antigen, B-58 alpha chain OS=Homo sapiens GN=HLA-B PE=2 SV=1        | 21.39         | 10.1557    | 36           |        |         |         | Cell surface, membrane |                      | Receptor, cell surface molecules               |            |  |  |
| 1B73_HUMAN  | HLA class I histocompatibility antigen, B-73 alpha chain OS=Homo sapiens GN=HLA-B PE=1 SV=1        | 13.68         | 6.673      | 43           |        |         |         | Cell surface, membrane |                      | Receptor, cell surface molecules               |            |  |  |
| 1B82_HUMAN  | HLA class I histocompatibility antigen, B-82 alpha chain OS=Homo sapiens GN=HLA-B PE=2 SV=1        | 27.77         | 10.1414    | 32           |        |         |         | Cell surface, membrane |                      | Receptor, cell surface molecules               |            |  |  |
| 1C01_HUMAN  | HLA class I histocompatibility antigen, Cw-1 alpha chain OS=Homo sapiens GN=HLA-C PE=2 SV=1        | 10.29         | 7.0502     | 38           | M      | H       |         | Cell surface, membrane |                      | Receptor, cell surface molecules               |            |  |  |
| 1C02_HUMAN  | HLA class I histocompatibility antigen, Cw-2 alpha chain OS=Homo sapiens GN=HLA-C PE=1 SV=1        | 12.58         | 9.5193     | 42           |        |         |         | Cell surface, membrane |                      | Receptor, cell surface molecules               |            |  |  |
| 1C03_HUMAN  | HLA class I histocompatibility antigen, Cw-3 alpha chain OS=Homo sapiens GN=HLA-C PE=1 SV=2        | 11.58         | 4.4743     | 52           |        |         |         | Cell surface, membrane |                      | Receptor, cell surface molecules               |            |  |  |
| 1C04_HUMAN  | HLA class I histocompatibility antigen, Cw-4 alpha chain OS=Homo sapiens GN=HLA-C PE=1 SV=1        | 12.12         | 7.3604     | 36           |        |         |         | Cell surface, membrane |                      | Receptor, cell surface molecules               |            |  |  |
| 1C06_HUMAN  | HLA class I histocompatibility antigen, Cw-6 alpha chain OS=Homo sapiens GN=HLA-C PE=1 SV=2        | 9.99          | 7.7701     | 45           |        |         |         | Cell surface, membrane |                      | Receptor, cell surface molecules               |            |  |  |
| 1C07_HUMAN  | HLA class I histocompatibility antigen, Cw-7 alpha chain OS=Homo sapiens GN=HLA-C PE=1 SV=3        | 11.9          | 5.3138     | 52           |        |         |         | Cell surface, membrane |                      | Receptor, cell surface molecules               |            |  |  |
| 1C12_HUMAN  | HLA class I histocompatibility antigen, Cw-12 alpha chain OS=Homo sapiens GN=HLA-C PE=1 SV=2       | 10.92         | 7.4722     | 51           |        |         |         | Cell surface, membrane |                      | Receptor, cell surface molecules               |            |  |  |
| 1C15_HUMAN  | HLA class I histocompatibility antigen, Cw-15 alpha chain OS=Homo sapiens GN=HLA-C PE=1 SV=1       | 11.94         | 4.7821     | 45           |        |         |         | Cell surface, membrane |                      | Receptor, cell surface molecules               |            |  |  |
| 1C16_HUMAN  | HLA class I histocompatibility antigen, Cw-16 alpha chain                                          | 5.64          | 4.1842     | 5            |        |         |         | Cell surface, membrane |                      | Receptor, cell surface molecules               |            |  |  |
| 1C17_HUMAN  | HLA class I histocompatibility antigen, Cw-17 alpha chain OS=Homo sapiens GN=HLA-C PE=1 SV=1       | 12.53         | 6.181      | 46           |        |         |         | Cell surface, membrane |                      | Receptor, cell surface molecules               |            |  |  |
| 1C18_HUMAN  | HLA class I histocompatibility antigen, Cw-18 alpha chain OS=Homo sapiens GN=HLA-C PE=2 SV=1       | 12.74         | 7.0073     | 38           |        |         |         | Cell surface, membrane |                      | Receptor, cell surface molecules               |            |  |  |
| 4F2_HUMAN   | 4F2 cell-surface antigen heavy chain OS=Homo sapiens GN=SLC3A2 PE=1 SV=3                           | 1.71          | 0.0906     | 4            |        |         | H       | Cell membrane          |                      | Transporter, vesicular or membrane trafficking |            |  |  |
| AAAT_HUMAN  | Neutral amino acid transporter B(0) OS=Homo sapiens GN=SLC1A5 PE=1 SV=2                            | 14.39         | 6.5197     | 61           | H      | H       |         | Cell membrane          |                      | Transporter, vesicular or membrane trafficking |            |  |  |
| ADA10_HUMAN | Disintegrin and metalloproteinase domain-containing protein 10 OS=Homo sapiens GN=ADAM10 PE=1 SV=1 | 16.29         | 9.7333     | 15           |        | M       | M       | Cell membrane, Golgi   |                      | Protease or protein degradation                |            |  |  |
| ADA17_HUMAN | Disintegrin and metalloproteinase domain-containing protein 17                                     | 16.68         | 5.7417     | 9            | H      |         |         | Cell membrane          |                      | Protease or protein degradation                |            |  |  |

|             |                                                                                                         |               |            | Prior Screen |        |         |         |                      |                             |   |                                                |                                                                                        |  |                |  |            |  |
|-------------|---------------------------------------------------------------------------------------------------------|---------------|------------|--------------|--------|---------|---------|----------------------|-----------------------------|---|------------------------------------------------|----------------------------------------------------------------------------------------|--|----------------|--|------------|--|
|             |                                                                                                         |               |            | Reference #  | 18     | 12      | 13      |                      |                             |   |                                                | Location                                                                               |  | Function Class |  | References |  |
|             |                                                                                                         |               |            | Cells        | Du-145 | Jurkat  | Neuro n |                      |                             |   |                                                |                                                                                        |  |                |  |            |  |
|             |                                                                                                         |               |            | Method       | ABE    | 17-ODYA | ABE     |                      |                             |   |                                                |                                                                                        |  |                |  |            |  |
| Protein ID  | Protein Name and Description                                                                            | Ratio (+/-HA) | STDEV(+/-) | #Peptide     |        |         |         | Known Palmitoylation |                             |   |                                                |                                                                                        |  |                |  |            |  |
|             | OS=Homo sapiens GN=ADAM17 PE=1 SV=1                                                                     |               |            |              |        |         |         |                      |                             |   |                                                |                                                                                        |  |                |  |            |  |
| AKAP9_HUMAN | A-kinase anchor protein 9 OS=Homo sapiens GN=AKAP9 PE=1 SV=3                                            | 20.66         | 2.1429     | 2            |        |         |         |                      | Cytoplasm, Golgi            |   | Scaffolding protein                            |                                                                                        |  |                |  |            |  |
| AL1B1_HUMAN | Aldehyde dehydrogenase X, mitochondrial OS=Homo sapiens GN=ALDH1B1 PE=1 SV=3                            | 3.51          | 1.2549     | 6            | H      |         |         |                      | Mitochondrial matrix        |   | Metabolism                                     |                                                                                        |  |                |  |            |  |
| ANKZ1_HUMAN | Ankyrin repeat and zinc finger domain-containing protein 1 OS=Homo sapiens GN=ANKZF1 PE=1 SV=1          | 4.24          | 0.1804     | 3            |        |         |         |                      | Unknown                     |   | Others                                         |                                                                                        |  |                |  |            |  |
| ANTR2_HUMAN | Anthrax toxin receptor 2 OS=Homo sapiens GN=ANTXR2 PE=1 SV=5                                            | 13.18         | 5.5924     | 5            | M      |         |         |                      | Cell, ER membrane, secreted | Y | Receptor, cell surface molecules               | <a href="#">J Cell Biol. 2006 Jan 16;172(2):309-20. Epub 2006 Jan 9.</a>               |  |                |  |            |  |
| ARL15_HUMAN | ADP-ribosylation factor-like protein 15 OS=Homo sapiens GN=ARL15 PE=1 SV=1                              | 12.77         | 3.4194     | 7            | H      | M       | M       |                      | Unknown                     |   | G protein associated regulator                 |                                                                                        |  |                |  |            |  |
| ARVC_HUMAN  | Armadillo repeat protein deleted in velo-cardio-facial syndrome OS=Homo sapiens GN=ARVCF PE=1 SV=1      | 7.08          | 2.3202     | 16           |        |         | M       |                      | Cell surface, membrane      |   | Cell adhesion or ECM interaction               |                                                                                        |  |                |  |            |  |
| AT11A_HUMAN | Probable phospholipid-transporting ATPase 1H OS=Homo sapiens GN=ATP11A PE=2 SV=3                        | 1.8           | 0.0906     | 2            | H      |         |         |                      | Cell surface, membrane      |   | Transporter, vesicular or membrane trafficking |                                                                                        |  |                |  |            |  |
| ATG3_HUMAN  | Ubiquitin-like-conjugating enzyme ATG3 OS=Homo sapiens GN=ATG3 PE=1 SV=1                                | 1.65          | 0.1001     | 5            |        |         |         |                      | Cytoplasm                   |   | Autophagy or apoptosis                         |                                                                                        |  |                |  |            |  |
| ATG7_HUMAN  | Ubiquitin-like modifier-activating enzyme ATG7 OS=Homo sapiens GN=ATG7 PE=1 SV=1                        | 1.85          | 0.0566     | 6            |        |         |         |                      | Cytoplasm                   |   | Autophagy or apoptosis                         |                                                                                        |  |                |  |            |  |
| AUP1_HUMAN  | Ancient ubiquitous protein 1 OS=Homo sapiens GN=AUP1 PE=1 SV=1                                          | 9.85          | 4.1179     | 14           | H      | H       |         |                      | ER membrane                 |   | Chaperone                                      |                                                                                        |  |                |  |            |  |
| B2L12_HUMAN | Bcl-2-like protein 12 OS=Homo sapiens GN=BCL2L12 PE=1 SV=1                                              | 16.51         | 6.1301     | 2            | M      |         |         |                      | Unknown                     |   | Autophagy or apoptosis                         |                                                                                        |  |                |  |            |  |
| B4GT1_HUMAN | Beta-1,4-galactosyltransferase 1 OS=Homo sapiens GN=B4GALT1 PE=1 SV=5                                   | 13.3          | 5.1149     | 2            | M      | M       |         |                      | Golgi                       |   | Phosphorylation or glycosylation               |                                                                                        |  |                |  |            |  |
| B4GT5_HUMAN | Beta-1,4-galactosyltransferase 5 OS=Homo sapiens GN=B4GALT5 PE=2 SV=1                                   | 13.3          | 5.1149     | 2            |        |         |         |                      | Golgi                       |   | Phosphorylation or glycosylation               |                                                                                        |  |                |  |            |  |
| BCAM_HUMAN  | Basal cell adhesion molecule OS=Homo sapiens GN=BCAM PE=1 SV=2                                          | 5.56          | 3.3602     | 7            | H      |         |         |                      | Cell membrane               |   | Cell adhesion or ECM interaction               |                                                                                        |  |                |  |            |  |
| BET1_HUMAN  | BET1 homolog OS=Homo sapiens GN=BET1 PE=1 SV=1                                                          | 8.01          | 0.3536     | 5            |        |         |         |                      | Golgi, ER membrane          |   | Transporter, vesicular or membrane trafficking |                                                                                        |  |                |  |            |  |
| BET1L_HUMAN | BET1-like protein OS=Homo sapiens GN=BET1L PE=1 SV=1                                                    | 25.52         | 19.4602    | 2            |        |         |         |                      | Golgi, ER membrane          |   | Transporter, vesicular or membrane trafficking |                                                                                        |  |                |  |            |  |
| BGAL_HUMAN  | Beta-galactosidase                                                                                      | 20.2805       | 15.14      | 2            |        |         |         |                      | Cytoplasm, lysosome         |   | Phosphorylation or glycosylation               |                                                                                        |  |                |  |            |  |
| BST2_HUMAN  | Bone marrow stromal antigen 2 OS=Homo sapiens GN=BST2 PE=1 SV=1                                         | 7.52          | 0.1001     | 3            |        |         |         |                      | Cell membrane               |   | Transporter, vesicular or membrane trafficking |                                                                                        |  |                |  |            |  |
| BTF3_HUMAN  | Transcription factor BTF3 OS=Homo sapiens GN=BTF3 PE=1 SV=1                                             | 2.12          | 0.0407     | 2            |        |         |         |                      | Nucleus                     |   | Transcription or translation regulator         |                                                                                        |  |                |  |            |  |
| C1QBP_HUMAN | Complement component 1 Q subcomponent-binding protein, mitochondrial OS=Homo sapiens GN=C1QBP PE=1 SV=1 | 2.01          | 0.2042     | 15           |        |         |         |                      | Mitochondrion               |   | Others                                         |                                                                                        |  |                |  |            |  |
| CALX_HUMAN  | Calnexin OS=Homo sapiens GN=CANX PE=1 SV=2                                                              | 35.9          | 18.8499    | 254          | H      | H       | H       |                      | ER membrane                 | Y | Chaperone                                      | <a href="#">EMBO J. 2011 Nov 1. doi: 10.1038/emboj.2011.384. [Epub ahead of print]</a> |  |                |  |            |  |
| CAN5_HUMAN  | Calpain-5 OS=Homo sapiens GN=CAPN5 PE=2 SV=2                                                            | 9.27          | 2.6542     | 12           |        |         | H       |                      | Cytoplasm                   |   | Protease or protein degradation                |                                                                                        |  |                |  |            |  |
| CATB_HUMAN  | Cathepsin B OS=Homo sapiens GN=CTSB PE=1 SV=3                                                           | 1.87          | 0.1706     | 15           |        |         | M       |                      | Lysosome                    |   | Protease or protein degradation                |                                                                                        |  |                |  |            |  |
| CATZ_HUMAN  | Cathepsin Z OS=Homo sapiens GN=CTSZ PE=1 SV=1                                                           | 2.01          | 0.0799     | 2            |        |         |         |                      | Lysosome                    |   | Protease or protein degradation                |                                                                                        |  |                |  |            |  |
| CAV1_HUMAN  | Caveolin-1 OS=Homo sapiens GN=CAV1 PE=1 SV=4                                                            | 32.18         | 12.884     | 213          | H      |         |         |                      | Cell membrane               | Y | Scaffolding protein                            | <a href="#">J Biol Chem. 1995 Mar 24;270(12):6838-42.</a>                              |  |                |  |            |  |
| CAV2_HUMAN  | Caveolin-2 OS=Homo sapiens GN=CAV2 PE=1 SV=2                                                            | 30.09         | 6.3199     | 42           | H      |         |         |                      | Cell membrane               |   | Scaffolding protein                            |                                                                                        |  |                |  |            |  |



|             |                                                                                                                 |               |            | Prior Screen |        |         |         |                      |                        |  |                                                |                                                                              |  |                |  |            |  |
|-------------|-----------------------------------------------------------------------------------------------------------------|---------------|------------|--------------|--------|---------|---------|----------------------|------------------------|--|------------------------------------------------|------------------------------------------------------------------------------|--|----------------|--|------------|--|
|             |                                                                                                                 |               |            | Reference #  | 18     | 12      | 13      |                      |                        |  |                                                | Location                                                                     |  | Function Class |  | References |  |
|             |                                                                                                                 |               |            | Cells        | Du-145 | Jurkat  | Neuro n |                      |                        |  |                                                |                                                                              |  |                |  |            |  |
|             |                                                                                                                 |               |            | Method       | ABE    | 17-ODYA | ABE     |                      |                        |  |                                                |                                                                              |  |                |  |            |  |
| Protein ID  | Protein Name and Description                                                                                    | Ratio (+/-HA) | STDEV(+/-) | #Peptide     |        |         |         | Known Palmitoylation |                        |  |                                                |                                                                              |  |                |  |            |  |
| CB018_HUMAN | Transmembrane protein C2orf18 OS=Homo sapiens GN=C2orf18 PE=1 SV=1                                              | 13.25         | 4.4482     | 2            | H      |         |         |                      | Cell membrane          |  | Others                                         |                                                                              |  |                |  |            |  |
| CBR3_HUMAN  | Carbonyl reductase [NADPH] 3 OS=Homo sapiens GN=CBR3 PE=1 SV=3                                                  | 1.51          | 0.134      | 4            |        |         |         |                      | Cytoplasm              |  | Metabolism                                     |                                                                              |  |                |  |            |  |
| CCNY_HUMAN  | Cyclin-Y OS=Homo sapiens GN=CCNY PE=1 SV=2                                                                      | 10.39         | 3.131      | 12           | H      | H       |         |                      | Cell membrane          |  | Others                                         |                                                                              |  |                |  |            |  |
| CCYL1_HUMAN | Cyclin-Y-like protein 1 OS=Homo sapiens GN=CCYL1 PE=1 SV=2                                                      | 10.09         | 1.13       | 4            | M      | M       |         |                      | Cell membrane          |  | Others                                         |                                                                              |  |                |  |            |  |
| CD151_HUMAN | CD151 antigen OS=Homo sapiens GN=CD151 PE=1 SV=3                                                                | 15.7          | 2.449      | 27           | H      |         |         | Y                    | Cell surface, membrane |  | Cell adhesion or ECM interaction               | <a href="#">Mol Biol Cell. 2002 Mar;13(3):767-81.</a>                        |  |                |  |            |  |
| CD276_HUMAN | CD276 antigen OS=Homo sapiens GN=CD276 PE=1 SV=1                                                                | 5.32          | 0.134      | 3            | M      |         |         | M                    | Cell surface, membrane |  | Receptor, cell surface molecules               |                                                                              |  |                |  |            |  |
| CD44_HUMAN  | CD44 antigen OS=Homo sapiens GN=CD44 PE=1 SV=3                                                                  | 34.4          | 10.1955    | 143          | H      |         |         | Y                    | Cell surface, membrane |  | Receptor, cell surface molecules               | <a href="#">J Biol Chem. 2006 Nov 10;281(45):34601-9. Epub 2006 Aug 30.</a>  |  |                |  |            |  |
| CD63_HUMAN  | CD63 antigen OS=Homo sapiens GN=CD63 PE=1 SV=2                                                                  | 28.54         | 4.2133     | 42           | H      |         |         |                      | Cell membrane          |  | Scaffolding protein                            |                                                                              |  |                |  |            |  |
| CD81_HUMAN  | CD81 antigen OS=Homo sapiens GN=CD81 PE=1 SV=1                                                                  | 30.74         | 15.5121    | 45           | H      | M       |         | Y                    | Cell surface, membrane |  | Receptor, cell surface molecules               | <a href="#">J Biol Chem. 2004 Jul 23;279(30):31973-82. Epub 2004 May 25.</a> |  |                |  |            |  |
| CD82_HUMAN  | CD82 antigen OS=Homo sapiens GN=CD82 PE=1 SV=1                                                                  | 20.77         | 0.4288     | 6            |        | M       |         | Y                    | Cell surface, membrane |  | Receptor, cell surface molecules               | <a href="#">Cancer Res. 2004 Oct 15;64(20):7455-63.</a>                      |  |                |  |            |  |
| CD9_HUMAN   | CD9 antigen OS=Homo sapiens GN=CD9 PE=1 SV=4                                                                    | 19.69         | 5.3344     | 133          | H      |         |         | Y                    | Cell membrane          |  | Cell adhesion or ECM interaction               | <a href="#">Mol Biol Cell. 2008 Aug;19(8):3415-25. Epub 2008 May 28.</a>     |  |                |  |            |  |
| CDK1_HUMAN  | Cyclin-dependent kinase 1                                                                                       | 2.84          | <0.0001    | 2            |        |         |         |                      | Cytoplasm, Nucleus     |  | Phosphorylation or glycosylation               |                                                                              |  |                |  |            |  |
| CF125_HUMAN | Uncharacterized protein C6orf125 OS=Homo sapiens GN=C6orf125 PE=1 SV=1                                          | 26.21         | 13.21      | 12           | M      |         |         | M                    | Unknown                |  | Others                                         |                                                                              |  |                |  |            |  |
| CH082_HUMAN | UPF0598 protein C8orf82 OS=Homo sapiens GN=C8orf82 PE=1 SV=2                                                    | 7.02          | 0.2133     | 2            |        |         |         |                      | Unknown                |  | Others                                         |                                                                              |  |                |  |            |  |
| CHD3_HUMAN  | Chromodomain-helicase-DNA-binding protein 3 OS=Homo sapiens GN=CHD3 PE=1 SV=3                                   | 16.14         | 1.4152     | 2            |        |         |         |                      | Cytoplasm, Nucleus     |  | Transcription or translation regulator         |                                                                              |  |                |  |            |  |
| CISD1_HUMAN | CDGSH iron-sulfur domain-containing protein 1 OS=Homo sapiens GN=CISD1 PE=1 SV=1                                | 1.57          | 0.142      | 3            |        |         |         |                      | Mitochondrial membrane |  | Metabolism                                     |                                                                              |  |                |  |            |  |
| CJ058_HUMAN | UPF0765 protein C10orf58 OS=Homo sapiens GN=C10orf58 PE=1 SV=3                                                  | 2.02          | 0.2224     | 16           |        |         |         |                      | Secreted               |  | Others                                         |                                                                              |  |                |  |            |  |
| CK059_HUMAN | RhoA activator C11orf59 OS=Homo sapiens GN=C11orf59 PE=1 SV=2                                                   | 24.94         | 7.0557     | 63           | H      | H       | H       |                      | Cell membrane          |  | Scaffolding protein                            |                                                                              |  |                |  |            |  |
| CKAP4_HUMAN | Cytoskeleton-associated protein 4 OS=Homo sapiens GN=CKAP4 PE=1 SV=2                                            | 18.7          | 5.5033     | 201          | H      |         |         | Y                    | ER membrane            |  | Cytoskeleton associated protein                | <a href="#">Mol Biol Cell. 2009 Mar;20(5):1454-63. Epub 2009 Jan 14.</a>     |  |                |  |            |  |
| CKLF7_HUMAN | CKLF-like MARVEL transmembrane domain-containing protein 7 OS=Homo sapiens GN=CMTM7 PE=2 SV=1                   | 12.99         | 8.4097     | 7            |        |         |         |                      | Cell membrane          |  | Others                                         |                                                                              |  |                |  |            |  |
| CLC14_HUMAN | C-type lectin domain family 14 member A OS=Homo sapiens GN=CLEC14A PE=1 SV=1                                    | 16.7          | 3.3199     | 51           |        |         |         |                      | Cell membrane          |  | Cell adhesion or ECM interaction               |                                                                              |  |                |  |            |  |
| CLD11_HUMAN | Claudin-11 OS=Homo sapiens GN=CLDN11 PE=1 SV=2                                                                  | 8.33          | 2.2527     | 26           |        |         |         |                      | Cell membrane          |  | Cell adhesion or ECM interaction               |                                                                              |  |                |  |            |  |
| CLD5_HUMAN  | Claudin-5 OS=Homo sapiens GN=CLDN5 PE=1 SV=1                                                                    | 10.76         | 2.7699     | 10           |        |         |         |                      | Cell membrane          |  | Cell adhesion or ECM interaction               |                                                                              |  |                |  |            |  |
| CLGN_HUMAN  | Calmeglin OS=Homo sapiens GN=CLGN PE=1 SV=1                                                                     | 19.46         | <0.0001    | 2            |        | M       |         |                      | ER membrane            |  | Others                                         |                                                                              |  |                |  |            |  |
| CPSF1_HUMAN | Cleavage and polyadenylation specificity factor subunit 1 OS=Homo sapiens GN=CPSF1 PE=1 SV=2                    | 2.2           | 0.2605     | 2            |        |         |         |                      | Nucleus                |  | Transcription or translation regulator         |                                                                              |  |                |  |            |  |
| CRIM1_HUMAN | Cysteine-rich motor neuron 1 protein OS=Homo sapiens GN=CRIM1 PE=1 SV=1                                         | 41.58         | 1.4647     | 8            |        |         |         |                      | Cell membrane          |  | Receptor, cell surface molecules               |                                                                              |  |                |  |            |  |
| CSPG2_HUMAN | Versican core protein OS=Homo sapiens GN=VCAN PE=1 SV=3                                                         | 1.55          | 0.142      | 3            |        |         |         |                      | Secreted               |  | Cell adhesion or ECM interaction               |                                                                              |  |                |  |            |  |
| CTDS1_HUMAN | Carboxy-terminal domain RNA polymerase II polypeptide A small phosphatase 1 OS=Homo sapiens GN=CTDSP1 PE=1 SV=1 | 9.88          | 3.3199     | 3            | H      | M       |         |                      | Nucleus                |  | Transcription or translation regulator         |                                                                              |  |                |  |            |  |
| CTL1_HUMAN  | Choline transporter-like protein 1 OS=Homo sapiens GN=SLC44A1 PE=1 SV=1                                         | 16.6          | 5.2688     | 12           | H      |         |         |                      | Cell membrane          |  | Transporter, vesicular or membrane trafficking |                                                                              |  |                |  |            |  |
| CTL2_HUMAN  | Choline transporter-like protein 2 OS=Homo sapiens                                                              | 33.2          | 2.1073     | 6            | M      |         |         | H                    | Cell membrane          |  | Transporter, vesicular or                      |                                                                              |  |                |  |            |  |

|             |                                                                                                    |               |            | Prior Screen |        |         |         |                         |                      |                                                |                                                                            |  |  |  |  |
|-------------|----------------------------------------------------------------------------------------------------|---------------|------------|--------------|--------|---------|---------|-------------------------|----------------------|------------------------------------------------|----------------------------------------------------------------------------|--|--|--|--|
|             |                                                                                                    |               |            | Reference #  | 18     | 12      | 13      |                         |                      |                                                |                                                                            |  |  |  |  |
|             |                                                                                                    |               |            | Cells        | Du-145 | Jurkat  | Neuro n |                         |                      |                                                |                                                                            |  |  |  |  |
|             |                                                                                                    |               |            | Method       | ABE    | 17-ODYA | ABE     |                         |                      |                                                |                                                                            |  |  |  |  |
| Protein ID  | Protein Name and Description                                                                       | Ratio (+/-HA) | STDEV(+/-) | #Peptide     |        |         |         | Location                | Known Palmitoylation | Function Class                                 | References                                                                 |  |  |  |  |
|             | GN=SLC44A2 PE=1 SV=3                                                                               |               |            |              |        |         |         |                         |                      | membrane trafficking                           |                                                                            |  |  |  |  |
| CTND1_HUMAN | Catenin delta-1 OS=Homo sapiens GN=CTNND1 PE=1 SV=1                                                | 17.76         | 5.2931     | 152          | H      |         | M       | Cell membrane           |                      | Cell adhesion or ECM interaction               |                                                                            |  |  |  |  |
| CY1_HUMAN   | Cytochrome c1, heme protein, mitochondrial OS=Homo sapiens GN=CYC1 PE=1 SV=3                       | 2.01          | 0.1834     | 2            |        |         | M       | Mitochondrion           |                      | Metabolism                                     |                                                                            |  |  |  |  |
| CYB5B_HUMAN | Cytochrome b5 type B OS=Homo sapiens GN=CYB5B PE=1 SV=2                                            | 9.67          | 0.7954     | 12           | M      |         | M       | Mitochondrion           |                      | Metabolism                                     |                                                                            |  |  |  |  |
| CYC_HUMAN   | Cytochrome c OS=Homo sapiens GN=CYCS PE=1 SV=2                                                     | 1.96          | 0.0414     | 7            |        |         | M       | Mitochondrial matrix    |                      | Metabolism                                     |                                                                            |  |  |  |  |
| DAG1_HUMAN  | Dystroglycan OS=Homo sapiens GN=DAG1 PE=1 SV=2                                                     | 34.02         | 9.159      | 9            |        |         | M       | Cell membrane, secreted |                      | Receptor, cell surface molecules               |                                                                            |  |  |  |  |
| DCTN1_HUMAN | Dynactin subunit 1 OS=Homo sapiens GN=DCTN1 PE=1 SV=3                                              | 3.17          | 3.363      | 2            |        |         |         | Cytoskeleton            |                      | Cytoskeleton associated protein                |                                                                            |  |  |  |  |
| DESM_HUMAN  | Desmin OS=Homo sapiens GN=DES PE=1 SV=3                                                            | 3.96          | 6.4389     | 10           |        |         |         | cytoplasm               |                      | Cytoskeleton associated protein                |                                                                            |  |  |  |  |
| DNJC5_HUMAN | DnaJ homolog subfamily C member 5 OS=Homo sapiens GN=DNJC5 PE=1 SV=1                               | 31.79         | 24.0672    | 29           | H      |         | M       | Cell membrane           | Y                    | Chaperone                                      | <a href="#">J Biol Chem. 2008 Sep 5;283(36):25014-26. Epub 2008 Jul 2.</a> |  |  |  |  |
| DOC2A_HUMAN | Double C2-like domain-containing protein alpha                                                     | 5.32          | 0          | 2            |        |         |         | Cell membrane           |                      | Transporter, vesicular or membrane trafficking |                                                                            |  |  |  |  |
| DPB1_HUMAN  | HLA class II histocompatibility antigen, DP beta 1 chain OS=Homo sapiens GN=HLA-DPB1 PE=1 SV=1     | 11.04         | 5.172      | 2            |        |         |         | Cell membrane           |                      | Receptor, cell surface molecules               |                                                                            |  |  |  |  |
| DTNA_HUMAN  | Dystrobrevin alpha OS=Homo sapiens GN=DTNA PE=1 SV=2                                               | 6.82          | 0.5541     | 3            |        |         |         | Cell membrane           |                      | Cell adhesion or ECM interaction               |                                                                            |  |  |  |  |
| DUS23_HUMAN | Dual specificity protein phosphatase 23 OS=Homo sapiens GN=DUSP23 PE=1 SV=1                        | 5.67          | 1.0979     | 33           |        |         |         | Cytoplasm, Nucleus      |                      | Phosphorylation or glycosylation               |                                                                            |  |  |  |  |
| ECE1_HUMAN  | Endothelin-converting enzyme 1 OS=Homo sapiens GN=ECE1 PE=1 SV=2                                   | 32.28         | 13.5625    | 109          | H      |         |         | Cell membrane           | Y                    | Protease or protein degradation                | <a href="#">Biochem J. 1999 Jun 15;340 ( Pt 3):649-56.</a>                 |  |  |  |  |
| EFR3A_HUMAN | Protein EFR3 homolog A OS=Homo sapiens GN=EFR3A PE=1 SV=2                                          | 14.77         | <0.0001    | 5            | H      |         |         | Cell membrane           |                      | Receptor, cell surface molecules               |                                                                            |  |  |  |  |
| EGLN_HUMAN  | Endoglin OS=Homo sapiens GN=ENG PE=1 SV=2                                                          | 1.72          | 0.7792     | 43           |        |         |         | Cell membrane           |                      | Cell adhesion or ECM interaction               |                                                                            |  |  |  |  |
| EPC1_HUMAN  | Enhancer of polycomb homolog 1                                                                     | 2.68          | 2.8353     | 2            |        |         |         | Nucleus                 |                      | Transcription or translation regulator         |                                                                            |  |  |  |  |
| EPCR_HUMAN  | Endothelial protein C receptor OS=Homo sapiens GN=PROCR PE=1 SV=1                                  | 60.17         | 27.9277    | 110          | H      |         |         | Cell surface, membrane  |                      | Receptor, cell surface molecules               |                                                                            |  |  |  |  |
| ERGI1_HUMAN | Endoplasmic reticulum-Golgi intermediate compartment protein 1 OS=Homo sapiens GN=ERGIC1 PE=1 SV=1 | 5.61          | 0.2579     | 2            |        |         | H       | ER membrane, Golgi      |                      | Transporter, vesicular or membrane trafficking |                                                                            |  |  |  |  |
| ERGI3_HUMAN | Endoplasmic reticulum-Golgi intermediate compartment protein 3 OS=Homo sapiens GN=ERGIC3 PE=1 SV=1 | 33.32         | 19.5728    | 11           | H      |         | H       | ER membrane, Golgi      |                      | Transporter, vesicular or membrane trafficking |                                                                            |  |  |  |  |
| ERO1A_HUMAN | ERO1-like protein alpha OS=Homo sapiens GN=ERO1L PE=1 SV=2                                         | 1.52          | 0.3831     | 3            |        |         |         | ER membrane             |                      | Metabolism                                     |                                                                            |  |  |  |  |
| ERP44_HUMAN | Endoplasmic reticulum resident protein 44 OS=Homo sapiens GN=ERP44 PE=1 SV=1                       | 1.58          | 0.3023     | 8            |        |         |         | ER                      |                      | Metabolism                                     |                                                                            |  |  |  |  |
| F108B_HUMAN | Abhydrolase domain-containing protein FAM108B1 OS=Homo sapiens GN=FAM108B1 PE=2 SV=1               | 23.08         | 20.2579    | 6            | H      |         | H       | Secreted                |                      | Others                                         |                                                                            |  |  |  |  |
| F162A_HUMAN | Protein FAM162A OS=Homo sapiens GN=FAM162A PE=1 SV=2                                               | 1.8           | 0.2438     | 2            |        |         |         | Secreted                |                      | Others                                         |                                                                            |  |  |  |  |
| F16P2_HUMAN | Fructose-1,6-bisphosphatase isozyme 2 OS=Homo sapiens GN=FBP2 PE=1 SV=2                            | 2.06          | 0.4652     | 2            |        |         |         | Cytoplasm               |                      | Metabolism                                     |                                                                            |  |  |  |  |
| F1711_HUMAN | Protein FAM171A1 OS=Homo sapiens GN=FAM171A1 PE=1 SV=1                                             | 31.27         | 20.0437    | 2            |        |         |         | Cell membrane           |                      | Others                                         |                                                                            |  |  |  |  |
| F176A_HUMAN | Protein FAM176A OS=Homo sapiens GN=FAM176A PE=2 SV=1                                               | 26.25         | 15.0818    | 5            |        |         |         | ER membrane             |                      | Autophagy or apoptosis                         |                                                                            |  |  |  |  |
| F184A_HUMAN | Protein FAM184A OS=Homo sapiens GN=FAM184A PE=2 SV=3                                               | 22.38         | 2.6149     | 3            |        |         |         | Unknown                 |                      | Others                                         |                                                                            |  |  |  |  |
| F193B_HUMAN | Protein FAM193B OS=Homo sapiens GN=FAM193B PE=2 SV=2                                               | 27.54         | 13.1992    | 8            |        |         |         | Unknown                 |                      | Others                                         |                                                                            |  |  |  |  |

|             |                                                                                                |               |            | Prior Screen |        |         |         |  |                         |   |  |                                                |                                                                              |                      |  |                |  |            |  |
|-------------|------------------------------------------------------------------------------------------------|---------------|------------|--------------|--------|---------|---------|--|-------------------------|---|--|------------------------------------------------|------------------------------------------------------------------------------|----------------------|--|----------------|--|------------|--|
|             |                                                                                                |               |            | Reference #  | 18     | 12      | 13      |  |                         |   |  | Location                                       |                                                                              | Known Palmitoylation |  | Function Class |  | References |  |
|             |                                                                                                |               |            | Cells        | Du-145 | Jurkat  | Neuro n |  |                         |   |  |                                                |                                                                              |                      |  |                |  |            |  |
|             |                                                                                                |               |            | Method       | ABE    | 17-ODYA | ABE     |  |                         |   |  |                                                |                                                                              |                      |  |                |  |            |  |
| Protein ID  | Protein Name and Description                                                                   | Ratio (+/-HA) | STDEV(+/-) | #Peptide     |        |         |         |  |                         |   |  |                                                |                                                                              |                      |  |                |  |            |  |
| FA38B_HUMAN | Protein FAM38B OS=Homo sapiens GN=FAM38B PE=2 SV=1                                             | 2.95          | 0.3269     | 29           |        |         |         |  | Cell membrane           |   |  | Receptor, cell surface molecules               |                                                                              |                      |  |                |  |            |  |
| FA49A_HUMAN | FAM49A                                                                                         | 3.59          | 0.9966     | 4            |        |         |         |  | Unknown                 |   |  | Others                                         |                                                                              |                      |  |                |  |            |  |
| FA49B_HUMAN | Protein FAM49B                                                                                 | 21.54         | 10.4692    | 8            |        | H       | M       |  | Unknown                 |   |  | Others                                         |                                                                              |                      |  |                |  |            |  |
| FABP5_HUMAN | Fatty acid-binding protein, epidermal OS=Homo sapiens GN=FABP5 PE=1 SV=3                       | 3.91          | 0.7628     | 17           |        |         |         |  | Cytoplasm               |   |  | Chaperone                                      |                                                                              |                      |  |                |  |            |  |
| FAS_HUMAN   | Fatty acid synthase OS=Homo sapiens GN=FASN PE=1 SV=3                                          | 2.27          | 0.4973     | 81           | M      |         |         |  | Cytoplasm               |   |  | Metabolism                                     |                                                                              |                      |  |                |  |            |  |
| FBLI1_HUMAN | Filamin-binding LIM protein 1 OS=Homo sapiens GN=FBLIM1 PE=1 SV=2                              | 2.15          | 0.3062     | 7            |        |         |         |  | Cytoplasm, cytoskeleton |   |  | Cytoskeleton associated protein                |                                                                              |                      |  |                |  |            |  |
| FBLN3_HUMAN | EGF-containing fibulin-like extracellular matrix protein 1 OS=Homo sapiens GN=EFEMP1 PE=1 SV=2 | 1.84          | 0.101      | 4            |        |         |         |  | Secreted                |   |  | Cell adhesion or ECM interaction               |                                                                              |                      |  |                |  |            |  |
| FIG4_HUMAN  | Polyphosphoinositide phosphatase OS=Homo sapiens GN=FIG4 PE=1 SV=1                             | 36.73         | 7.7691     | 3            |        |         |         |  | Endosome membrane       |   |  | Transporter, vesicular or membrane trafficking |                                                                              |                      |  |                |  |            |  |
| FLOT1_HUMAN | Flotillin-1 OS=Homo sapiens GN=FLOT1 PE=1 SV=3                                                 | 4.58          | 1.5989     | 126          | H      | H       |         |  | Cell membrane           | Y |  | Scaffolding protein                            | <a href="#">J Biol Chem. 2002 Dec 13;277(50):48834-41. Epub 2002 Oct 4.</a>  |                      |  |                |  |            |  |
| FLOT2_HUMAN | Flotillin-2 OS=Homo sapiens GN=FLOT2 PE=1 SV=2                                                 | 16.11         | 5.8293     | 5            | H      | H       |         |  | Cell membrane           | Y |  | Scaffolding protein                            | <a href="#">Biochem J. 2004 Mar 1;378(Pt 2):509-18.</a>                      |                      |  |                |  |            |  |
| FND3A_HUMAN | Fibronectin type-III domain-containing protein 3A OS=Homo sapiens GN=FND3A PE=1 SV=4           | 2.16          | 1.5683     | 2            |        |         | M       |  | Golgi membrane          |   |  | Cell adhesion or ECM interaction               |                                                                              |                      |  |                |  |            |  |
| FPRP_HUMAN  | Prostaglandin F2 receptor negative regulator OS=Homo sapiens GN=PTGFRN PE=1 SV=2               | 2.61          | 0.8622     | 28           | H      |         | H       |  | Cell membrane           |   |  | Receptor, cell surface molecules               |                                                                              |                      |  |                |  |            |  |
| FRPD4_HUMAN | FERM and PDZ domain-containing protein 4 OS=Homo sapiens GN=FRMPD4 PE=1 SV=1                   | 7.67          | 0.1434     | 2            |        |         |         |  | Unknown                 |   |  | Others                                         |                                                                              |                      |  |                |  |            |  |
| FUBP3_HUMAN | Far upstream element-binding protein 3                                                         | 2.7           | 0.7062     | 4            |        |         |         |  | Nucleus                 |   |  | Transcription or translation regulator         |                                                                              |                      |  |                |  |            |  |
| FYN_HUMAN   | Tyrosine-protein kinase Fyn OS=Homo sapiens GN=FYN PE=1 SV=3                                   | 4.33          | 0.4947     | 6            |        |         | H       |  | Cell membrane           | Y |  | Phosphorylation or glycosylation               | <a href="#">J Cell Biol. 1994 Jul;126(2):353-63.</a>                         |                      |  |                |  |            |  |
| GALT1_HUMAN | Polypeptide N-acetylgalactosaminyltransferase 1 OS=Homo sapiens GN=GALNT1 PE=1 SV=1            | 14.89         | 3.1039     | 27           |        |         | M       |  | Golgi, secreted         |   |  | Phosphorylation or glycosylation               |                                                                              |                      |  |                |  |            |  |
| GAPR1_HUMAN | Golgi-associated plant pathogenesis-related protein 1 OS=Homo sapiens GN=GLIPR2 PE=1 SV=3      | 1.99          | 0.1509     | 9            |        |         |         |  | Golgi                   |   |  | Others                                         |                                                                              |                      |  |                |  |            |  |
| GIMA7_HUMAN | GTPase IMAP family member 7 OS=Homo sapiens GN=GIMAP7 PE=2 SV=1                                | 34.39         | <0.0001    | 2            |        |         |         |  | Unknown                 |   |  | Others                                         |                                                                              |                      |  |                |  |            |  |
| GLCE_HUMAN  | D-glucuronyl C5-epimerase OS=Homo sapiens GN=GLCE PE=1 SV=3                                    | 10.57         | 2.3473     | 28           |        |         |         |  | Golgi membrane          |   |  | Metabolism                                     |                                                                              |                      |  |                |  |            |  |
| GLT10_HUMAN | Polypeptide N-acetylgalactosaminyltransferase 10 OS=Homo sapiens GN=GALNT10 PE=1 SV=2          | 16.64         | <0.0001    | 2            |        |         |         |  | Golgi membrane          |   |  | Phosphorylation or glycosylation               |                                                                              |                      |  |                |  |            |  |
| GLU2B_HUMAN | Glucosidase 2 subunit beta OS=Homo sapiens GN=PRKCSH PE=1 SV=2                                 | 1.82          | 0.2591     | 2            |        |         | M       |  | ER membrane             |   |  | Metabolism                                     |                                                                              |                      |  |                |  |            |  |
| GNA11_HUMAN | Guanine nucleotide-binding protein subunit alpha-11 OS=Homo sapiens GN=GNA11 PE=1 SV=2         | 31.71         | 16.3218    | 105          | H      | H       |         |  | Cell membrane           | Y |  | G protein associated regulator                 | <a href="#">J Biol Chem. 2001 Sep 21;276(38):35883-90. Epub 2001 Jul 18.</a> |                      |  |                |  |            |  |
| GNA12_HUMAN | Guanine nucleotide-binding protein subunit alpha-12 OS=Homo sapiens GN=GNA12 PE=1 SV=4         | 4.42          | 1.2641     | 16           | H      |         |         |  | Cell membrane           | Y |  | G protein associated regulator                 | <a href="#">J Biol Chem. 2002 Sep 6;277(36):32409-12. Epub 2002 Jul 12.</a>  |                      |  |                |  |            |  |
| GNA13_HUMAN | Guanine nucleotide-binding protein subunit alpha-13 OS=Homo sapiens GN=GNA13 PE=1 SV=2         | 23.54         | 13.1964    | 44           | H      | H       |         |  | Cell membrane           | Y |  | G protein associated regulator                 | <a href="#">J Biol Chem. 2000 May 19;275(20):14992-9.</a>                    |                      |  |                |  |            |  |
| GNA14_HUMAN | Guanine nucleotide-binding protein subunit alpha-14 OS=Homo sapiens GN=GNA14 PE=2 SV=1         | 25.49         | 12.5275    | 38           |        |         |         |  | Cell membrane           | Y |  | G protein associated regulator                 | <a href="#">J Biol Chem. 2007 Aug 31;282(35):25199-212. Epub 2007 Jul 9.</a> |                      |  |                |  |            |  |
| GNA15_HUMAN | Guanine nucleotide-binding protein subunit alpha-15 OS=Homo sapiens GN=GNA15 PE=2 SV=2         | 7.55          | 3.1512     | 2            |        |         | H       |  | Cell membrane           |   |  | G protein associated regulator                 |                                                                              |                      |  |                |  |            |  |

|             |                                                                                                        |               |            | Prior Screen |        |         |         |                          |   |  |                                                |                                                                                                                               |  |                      |  |                |  |            |  |
|-------------|--------------------------------------------------------------------------------------------------------|---------------|------------|--------------|--------|---------|---------|--------------------------|---|--|------------------------------------------------|-------------------------------------------------------------------------------------------------------------------------------|--|----------------------|--|----------------|--|------------|--|
|             |                                                                                                        |               |            | Reference #  | 18     | 12      | 13      |                          |   |  |                                                | Location                                                                                                                      |  | Known Palmitoylation |  | Function Class |  | References |  |
|             |                                                                                                        |               |            | Cells        | Du-145 | Jurkat  | Neuro n |                          |   |  |                                                |                                                                                                                               |  |                      |  |                |  |            |  |
|             |                                                                                                        |               |            | Method       | ABE    | 17-ODYA | ABE     |                          |   |  |                                                |                                                                                                                               |  |                      |  |                |  |            |  |
| Protein ID  | Protein Name and Description                                                                           | Ratio (+/-HA) | STDEV(+/-) | #Peptide     |        |         |         |                          |   |  |                                                |                                                                                                                               |  |                      |  |                |  |            |  |
| GNAI2_HUMAN | Guanine nucleotide-binding protein G(i) subunit alpha-2 OS=Homo sapiens GN=GNAI2 PE=1 SV=3             | 4.99          | 2.857      | 62           | H      | H       |         | Cytoplasm, cell membrane |   |  | G protein associated regulator                 |                                                                                                                               |  |                      |  |                |  |            |  |
| GNAI3_HUMAN | Guanine nucleotide-binding protein G(k) subunit alpha OS=Homo sapiens GN=GNAI3 PE=1 SV=3               | 5.84          | 4.5352     | 21           | H      | H       |         | Cytoplasm, cell membrane |   |  | G protein associated regulator                 |                                                                                                                               |  |                      |  |                |  |            |  |
| GNAO_HUMAN  | Guanine nucleotide-binding protein G(o) subunit alpha                                                  | 3.79          | 0.8861     | 5            | M      | H       |         | Cytoplasm, cell membrane | Y |  | G protein associated regulator                 | <a href="http://www.ncbi.nlm.nih.gov/pubmed/12082501">Int J Biochem Cell Biol. 2009 Jul;41(7):1495-501. Epub 2008 Dec 25.</a> |  |                      |  |                |  |            |  |
| GNAQ_HUMAN  | Guanine nucleotide-binding protein G(q) subunit alpha OS=Homo sapiens GN=GNAQ PE=1 SV=4                | 27.83         | 13.9933    | 74           | H      | H       |         | Cytoplasm, cell membrane | Y |  | G protein associated regulator                 | <a href="http://www.ncbi.nlm.nih.gov/pubmed/12082501">J Biol Chem. 2000 Jan 14;275(2):1327-36.</a>                            |  |                      |  |                |  |            |  |
| GNAS2_HUMAN | Guanine nucleotide-binding protein G(s) subunit alpha isoforms short OS=Homo sapiens GN=GNAS PE=1 SV=1 | 6.75          | 5.0749     | 20           | H      | H       |         | Cytoplasm, cell membrane | Y |  | G protein associated regulator                 | <a href="http://www.ncbi.nlm.nih.gov/pubmed/12082501">Proc Natl Acad Sci U S A. 1997 Jun 10;94(12):6116-20.</a>               |  |                      |  |                |  |            |  |
| GNPAT_HUMAN | Dihydroxyacetone phosphate acyltransferase OS=Homo sapiens GN=GNPAT PE=1 SV=1                          | 1.82          | 0.4182     | 3            | M      | M       |         | Cell membrane            |   |  | Metabolism                                     |                                                                                                                               |  |                      |  |                |  |            |  |
| GOGA7_HUMAN | Golgin subfamily A member 7 OS=Homo sapiens GN=GOLGA7 PE=1 SV=2                                        | 40.64         | 23.8972    | 21           | H      | H       |         | Golgi membrane           |   |  | Transporter, vesicular or membrane trafficking |                                                                                                                               |  |                      |  |                |  |            |  |
| GOLI4_HUMAN | Golgi integral membrane protein 4 OS=Homo sapiens GN=GOLIM4 PE=1 SV=1                                  | 7.18          | 1.5821     | 4            | H      |         |         | Golgi, cell membrane     |   |  | Transporter, vesicular or membrane trafficking |                                                                                                                               |  |                      |  |                |  |            |  |
| GPX1_HUMAN  | Glutathione peroxidase 1 OS=Homo sapiens GN=GPX1 PE=1 SV=4                                             | 7.95          | 1.0962     | 7            |        |         | M       | Cytoplasm                |   |  | Metabolism                                     |                                                                                                                               |  |                      |  |                |  |            |  |
| GPX4_HUMAN  | Phospholipid hydroperoxide glutathione peroxidase, mitochondrial OS=Homo sapiens GN=GPX4 PE=1 SV=3     | 4.29          | <0.0001    | 2            |        |         | M       | Cytoplasm, mitochondrion |   |  | Metabolism                                     |                                                                                                                               |  |                      |  |                |  |            |  |
| GPX8_HUMAN  | Probable glutathione peroxidase 8 OS=Homo sapiens GN=GPX8 PE=1 SV=2                                    | 5.73          | 0.5386     | 13           |        |         |         | Cell membrane            |   |  | Metabolism                                     |                                                                                                                               |  |                      |  |                |  |            |  |
| GRHPR_HUMAN | Glyoxylate reductase/hydroxypyruvate reductase OS=Homo sapiens GN=GRHPR PE=1 SV=1                      | 2.45          | 1.3448     | 2            |        |         |         | Unknown                  |   |  | Metabolism                                     |                                                                                                                               |  |                      |  |                |  |            |  |
| GRIK2_HUMAN | Glutamate receptor, ionotropic kainate 2 OS=Homo sapiens GN=GRIK2 PE=1 SV=1                            | 5.9           | 3.9837     | 2            |        |         |         | Cell membrane            |   |  | Receptor, cell surface molecules               |                                                                                                                               |  |                      |  |                |  |            |  |
| GROA_HUMAN  | Growth-regulated alpha protein OS=Homo sapiens GN=CXCL1 PE=1 SV=1                                      | 112.99        | 60.642     | 2            |        |         |         | Secreted                 |   |  | Cell adhesion or ECM interaction               |                                                                                                                               |  |                      |  |                |  |            |  |
| GSLG1_HUMAN | Golgi apparatus protein 1 OS=Homo sapiens GN=GLG1 PE=1 SV=2                                            | 19.69         | 10.1229    | 28           |        | M       | H       | Golgi membrane           |   |  | Cell adhesion or ECM interaction               |                                                                                                                               |  |                      |  |                |  |            |  |
| HDAC1_HUMAN | Histone deacetylase 1 OS=Homo sapiens GN=HDAC1 PE=1 SV=1                                               | 1.69          | 0.86       | 2            |        |         |         | Nucleus                  |   |  | Transcription or translation regulator         |                                                                                                                               |  |                      |  |                |  |            |  |
| HLA_G_HUMAN | HLA class I histocompatibility antigen, alpha chain G OS=Homo sapiens GN=HLA-G PE=1 SV=1               | 8.75          | 15.99      | 5.6154       |        |         |         | Cell surface, membrane   |   |  | Receptor, cell surface molecules               |                                                                                                                               |  |                      |  |                |  |            |  |
| ICAM2_HUMAN | Intercellular adhesion molecule 2 OS=Homo sapiens GN=ICAM2 PE=1 SV=2                                   | 17.22         | 0.7257     | 22           |        |         |         | Cell membrane            |   |  | Cell adhesion or ECM interaction               |                                                                                                                               |  |                      |  |                |  |            |  |
| IF2G_HUMAN  | Eukaryotic translation initiation factor 2 subunit 3 OS=Homo sapiens GN=EIF2S3 PE=1 SV=3               | 1.83          | 0.2895     | 8            |        |         |         | Cytoplasm                |   |  | Transcription or translation regulator         |                                                                                                                               |  |                      |  |                |  |            |  |
| IFM1_HUMAN  | Interferon-induced transmembrane protein 1                                                             | 14.18         | 6.1603     | 8            |        |         |         | Cell membrane            |   |  | Cell adhesion or ECM interaction               |                                                                                                                               |  |                      |  |                |  |            |  |
| IFM3_HUMAN  | Interferon-induced transmembrane protein 3 OS=Homo sapiens GN=IFITM3 PE=1 SV=2                         | 14.07         | 6.0265     | 40           |        |         |         | Cell membrane            | Y |  | Cell adhesion or ECM interaction               | <a href="http://www.ncbi.nlm.nih.gov/pubmed/20107444">Nat Chem Biol. 2010 Aug;6(8):610-4. Epub 2010 Jul 4.</a>                |  |                      |  |                |  |            |  |
| IL6RB_HUMAN | Interleukin-6 receptor subunit beta OS=Homo sapiens GN=IL6ST PE=1 SV=2                                 | 5.15          | 0.7581     | 2            | M      |         |         | Cell membrane, secreted  |   |  | Receptor, cell surface molecules               |                                                                                                                               |  |                      |  |                |  |            |  |
| INF2_HUMAN  | Inverted formin-2 OS=Homo sapiens GN=INF2 PE=1 SV=2                                                    | 2.21          | 1.836      | 3            |        |         |         | Cytoplasm                |   |  | Cytoskeleton associated protein                |                                                                                                                               |  |                      |  |                |  |            |  |
| ITA3_HUMAN  | Integrin alpha-3 OS=Homo sapiens GN=ITGA3 PE=1 SV=4                                                    | 24.81         | 5.8207     | 20           | M      |         |         | Cell membrane            |   |  | Receptor, cell surface molecules               |                                                                                                                               |  |                      |  |                |  |            |  |
| ITA5_HUMAN  | Integrin alpha-5 OS=Homo sapiens GN=ITGA5 PE=1 SV=2                                                    | 1.65          | 0.1706     | 8            |        |         |         | Cell membrane            |   |  | Receptor, cell surface molecules               |                                                                                                                               |  |                      |  |                |  |            |  |
| ITA6_HUMAN  | Integrin alpha-6 OS=Homo sapiens GN=ITGA6 PE=1 SV=4                                                    | 34.88         | 13.0605    | 53           | M      |         |         | Cell membrane            |   |  | Receptor, cell surface molecules               |                                                                                                                               |  |                      |  |                |  |            |  |
| ITM2B_HUMAN | Integral membrane protein 2B OS=Homo sapiens GN=ITM2B                                                  | 20.02         | <0.0001    | 2            | M      |         |         | Cell membrane            |   |  | Protease or protein degradation                |                                                                                                                               |  |                      |  |                |  |            |  |

|             |                                                                                                          |               |            | Prior Screen |        |         |         |               |                      |                                                |                                                                        |
|-------------|----------------------------------------------------------------------------------------------------------|---------------|------------|--------------|--------|---------|---------|---------------|----------------------|------------------------------------------------|------------------------------------------------------------------------|
|             |                                                                                                          |               |            | Reference #  | 18     | 12      | 13      |               |                      |                                                |                                                                        |
|             |                                                                                                          |               |            | Cells        | Du-145 | Jurkat  | Neuro n |               |                      |                                                |                                                                        |
|             |                                                                                                          |               |            | Method       | ABE    | 17-ODYA | ABE     |               |                      |                                                |                                                                        |
| Protein ID  | Protein Name and Description                                                                             | Ratio (+/-HA) | STDEV(+/-) | #Peptide     |        |         |         | Location      | Known Palmitoylation | Function Class                                 | References                                                             |
|             | PE=1 SV=1                                                                                                |               |            |              |        |         |         |               |                      |                                                |                                                                        |
| JAK1_HUMAN  | Tyrosine-protein kinase JAK1 OS=Homo sapiens GN=JAK1 PE=1 SV=2                                           | 4.89          | 0.9315     | 5            |        |         |         | Cell membrane |                      | Phosphorylation or glycosylation               |                                                                        |
| JAM3_HUMAN  | Junctional adhesion molecule C OS=Homo sapiens GN=JAM3 PE=1 SV=1                                         | 29.63         | 4.1189     | 17           |        |         | M       | Cell membrane |                      | Cell adhesion or ECM interaction               |                                                                        |
| K1C40_HUMAN | Keratin, type I cytoskeletal 40 OS=Homo sapiens GN=KRT40 PE=1 SV=2                                       | 14.33         | 16.8763    | 4            |        |         |         | Cytoplasm     |                      | Cytoskeleton associated protein                |                                                                        |
| K2013_HUMAN | Uncharacterized protein KIAA2013 OS=Homo sapiens GN=KIAA2013 PE=2 SV=1                                   | 51.7          | 35.8231    | 6            |        |         |         | Unknown       |                      | Others                                         |                                                                        |
| KDIS_HUMAN  | Kinase D-interacting substrate of 220 kDa                                                                | 7.67          | 11.3627    | 3            |        |         |         | Cell membrane |                      | Scaffolding protein                            |                                                                        |
| KIF3B_HUMAN | Kinesin-like protein KIF3B OS=Homo sapiens GN=KIF3B PE=1 SV=1                                            | 67.66         | 45.4555    | 9            |        |         |         | Cytoplasm     |                      | Cytoskeleton associated protein                |                                                                        |
| LAMA4_HUMAN | Laminin subunit alpha-4 OS=Homo sapiens GN=LAMA4 PE=1 SV=4                                               | 22.38         | 2.6149     | 2            |        |         |         | Secreted      |                      | Cell adhesion or ECM interaction               |                                                                        |
| LAP2_HUMAN  | Protein LAP2 OS=Homo sapiens GN=ERBB2IP PE=1 SV=2                                                        | 9.15          | 1.3026     | 4            | H      | H       |         | Cell membrane | Y                    | Receptor, cell surface molecules               | <a href="#">Genes Cells. 2008 Jul;13(7):691-701. Epub 2008 May 21.</a> |
| LAP4A_HUMAN | Lysosomal-associated transmembrane protein 4A OS=Homo sapiens GN=LAPTM4A PE=1 SV=1                       | 11.42         | 1.4112     | 4            | H      |         |         | Lysosome      |                      | Transporter, vesicular or membrane trafficking |                                                                        |
| LAPM5_HUMAN | Lysosomal-associated transmembrane protein 5 OS=Homo sapiens GN=LAPTM5 PE=1 SV=1                         | 11.92         | 6.9478     | 2            |        |         |         | Lysosome      |                      | Others                                         |                                                                        |
| LCAP_HUMAN  | Leucyl-cystinyl aminopeptidase OS=Homo sapiens GN=LNPEP PE=1 SV=3                                        | 15.68         | 5.3075     | 26           | H      | H       |         | Cell membrane |                      | Protease or protein degradation                |                                                                        |
| LHPL2_HUMAN | Lipoma HMGIC fusion partner-like 2 protein OS=Homo sapiens GN=LHFPL2 PE=2 SV=2                           | 25.52         | 6.8352     | 3            |        |         |         | Cell membrane |                      | Others                                         |                                                                        |
| LMBL3_HUMAN | Lethal(3)malignant brain tumor-like protein 3 OS=Homo sapiens GN=L3MBTL3 PE=1 SV=2                       | 42.55         | 23.1112    | 2            |        |         |         | Nucleus       |                      | Transcription or translation regulator         |                                                                        |
| LRC32_HUMAN | Leucine-rich repeat-containing protein 32 OS=Homo sapiens GN=LRRRC32 PE=1 SV=1                           | 26.8          | 10.394     | 32           |        |         |         | Cell membrane |                      | Others                                         |                                                                        |
| LRC47_HUMAN | Leucine-rich repeat-containing protein 47 OS=Homo sapiens GN=LRRRC47 PE=1 SV=1                           | 3.06          | 2.6149     | 5            |        |         |         | Unknown       |                      | Others                                         |                                                                        |
| LRRC1_HUMAN | Leucine-rich repeat-containing protein 1 OS=Homo sapiens GN=LRRC1 PE=1 SV=1                              | 20.68         | 7.0865     | 4            | H      | M       |         | Cell membrane |                      | Scaffolding protein                            |                                                                        |
| LYRIC_HUMAN | Protein LYRIC OS=Homo sapiens GN=MTDH PE=1 SV=2                                                          | 35.97         | 17.0441    | 79           | H      | H       | H       | Cell membrane |                      | Cell adhesion or ECM interaction               |                                                                        |
| LYVE1_HUMAN | Lymphatic vessel endothelial hyaluronate receptor 1 OS=Homo sapiens GN=LYVE1 PE=1 SV=2                   | 13.04         | 0.0868     | 2            |        |         |         | Cell membrane |                      | Transporter, vesicular or membrane trafficking |                                                                        |
| MA1B1_HUMAN | Endoplasmic reticulum mannosyl-oligosaccharide 1,2-alpha-mannosidase OS=Homo sapiens GN=MAN1B1 PE=1 SV=2 | 17.9          | 5.0509     | 21           |        |         |         | ER membrane   |                      | Phosphorylation or glycosylation               |                                                                        |
| MALD1_HUMAN | Putative MARVEL domain-containing protein 1 OS=Homo sapiens GN=MARVELD1 PE=5 SV=1                        | 13.17         | 1.4492     | 5            |        |         |         | Cell membrane |                      | Cytoskeleton associated protein                |                                                                        |
| MAML3_HUMAN | Mastermind-like protein 3                                                                                | 57.3          | 34.88      | 2            |        |         |         | Nucleus       |                      | Transcription or translation regulator         |                                                                        |
| MAT2B_HUMAN | Methionine adenosyltransferase 2 subunit beta OS=Homo sapiens GN=MAT2B PE=1 SV=1                         | 5.08          | 1.9874     | 2            |        |         |         | Unknown       |                      | Metabolism                                     |                                                                        |
| MBL2_HUMAN  | Metallo-beta-lactamase domain-containing protein 2 OS=Homo sapiens GN=MBL2 PE=1 SV=3                     | 21.65         | 8.3129     | 9            |        |         |         | Unknown       |                      | Others                                         |                                                                        |
| MCM6_HUMAN  | DNA replication licensing factor MCM6 OS=Homo sapiens GN=MCM6 PE=1 SV=1                                  | 2.89          | 0.3968     | 7            |        |         |         | Nucleus       |                      | Transcription or translation regulator         |                                                                        |
| MCRS1_HUMAN | Microspherule protein 1 OS=Homo sapiens GN=MCRS1 PE=1 SV=1                                               | 3             | 1.8889     | 2            |        |         |         | Nucleus       |                      | Transcription or translation regulator         |                                                                        |
| MDC1_HUMAN  | Mediator of DNA damage checkpoint protein 1                                                              | 4.21          | 2.4197     | 2            |        |         |         | Nucleus       |                      | Scaffolding protein                            |                                                                        |

|             |                                                                                                                                                    |               |            | Prior Screen |        |         |        |                      |                      |                                                |                                                                            |  |  |  |  |
|-------------|----------------------------------------------------------------------------------------------------------------------------------------------------|---------------|------------|--------------|--------|---------|--------|----------------------|----------------------|------------------------------------------------|----------------------------------------------------------------------------|--|--|--|--|
|             |                                                                                                                                                    |               |            | Reference #  | 18     | 12      | 13     |                      |                      |                                                |                                                                            |  |  |  |  |
|             |                                                                                                                                                    |               |            | Cells        | Du-145 | Jurkat  | Neuron |                      |                      |                                                |                                                                            |  |  |  |  |
|             |                                                                                                                                                    |               |            | Method       | ABE    | 17-ODYA | ABE    |                      |                      |                                                |                                                                            |  |  |  |  |
| Protein ID  | Protein Name and Description                                                                                                                       | Ratio (+/-HA) | STDEV(+/-) | #Peptide     |        |         |        | Location             | Known Palmitoylation | Function Class                                 | References                                                                 |  |  |  |  |
| MENTO_HUMAN | MLN64 N-terminal domain homolog OS=Homo sapiens GN=STARD3NL PE=1 SV=1                                                                              | 7.63          | 4.6286     | 2            | H      |         |        | Endosome membrane    |                      | Others                                         |                                                                            |  |  |  |  |
| MFS10_HUMAN | Major facilitator superfamily domain-containing protein 10 OS=Homo sapiens GN=MFS10 PE=2 SV=1                                                      | 1.83          | 0.126      | 3            |        |         |        | Cell membrane        |                      | Others                                         |                                                                            |  |  |  |  |
| MGST3_HUMAN | Microsomal glutathione S-transferase 3 OS=Homo sapiens GN=MGST3 PE=1 SV=1                                                                          | 1.6           | 0.0846     | 8            |        |         |        | ER membrane          |                      | Metabolism                                     |                                                                            |  |  |  |  |
| MINT_HUMAN  | Msx2-interacting protein OS=Homo sapiens GN=SPEN PE=1 SV=1                                                                                         | 20.35         | 0.6328     | 2            |        |         |        | Nucleus              |                      | Scaffolding protein                            |                                                                            |  |  |  |  |
| MIRO2_HUMAN | Mitochondrial Rho GTPase 2 OS=Homo sapiens GN=RHOT2 PE=1 SV=2                                                                                      | 22.78         | 1.2429     | 3            |        |         |        | Mitochondrion        |                      | G protein associated regulator                 |                                                                            |  |  |  |  |
| MLEC_HUMAN  | Malectin OS=Homo sapiens GN=MLEC PE=1 SV=1                                                                                                         | 11.92         | 6.9478     | 17           |        |         |        | ER membrane          |                      | Phosphorylation or glycosylation               |                                                                            |  |  |  |  |
| MMP14_HUMAN | Matrix metalloproteinase-14 OS=Homo sapiens GN=MMP14 PE=1 SV=2                                                                                     | 5.07          | 1.9774     | 11           | H      |         |        | Cell membrane        | Y                    | Cell adhesion or ECM interaction               | <a href="#">FASEB J. 2005 Aug;19(10):1326-8. Epub 2005 Jun 9.</a>          |  |  |  |  |
| MOFA1_HUMAN | MORF4 family-associated protein 1                                                                                                                  | 3.64          | 3.5343     | 2            |        |         |        | Cytoplasm, Nucleus   |                      | Others                                         |                                                                            |  |  |  |  |
| MPRD_HUMAN  | Cation-dependent mannose-6-phosphate receptor OS=Homo sapiens GN=M6PR PE=1 SV=1                                                                    | 32.29         | 26.7646    | 16           | M      |         |        | Lysosome membrane    | Y                    | Transporter, vesicular or membrane trafficking | <a href="#">J Cell Biol. 1996 Feb;132(4):577-84.</a>                       |  |  |  |  |
| MREG_HUMAN  | Melanoregulin OS=Homo sapiens GN=MREG PE=1 SV=1                                                                                                    | 22.37         | 10.7142    | 2            | M      | M       |        | Cell membrane        |                      | Others                                         |                                                                            |  |  |  |  |
| MUC18_HUMAN | Cell surface glycoprotein MUC18 OS=Homo sapiens GN=MCAM PE=1 SV=2                                                                                  | 28.92         | 13.6417    | 511          | H      |         | H      | Cell membrane        |                      | Cell adhesion or ECM interaction               |                                                                            |  |  |  |  |
| MYCT1_HUMAN | Myc target protein 1 OS=Homo sapiens GN=MYCT1 PE=2 SV=1                                                                                            | 12.69         | 4.5881     | 5            |        |         |        | Nucleus              |                      | Transcription or translation regulator         |                                                                            |  |  |  |  |
| MYOF_HUMAN  | Myoferlin OS=Homo sapiens GN=MYOF PE=1 SV=1                                                                                                        | 5.42          | 2.4383     | 139          |        |         |        | Cell membrane        |                      | Transporter, vesicular or membrane trafficking |                                                                            |  |  |  |  |
| MYST4_HUMAN | Histone acetyltransferase MYST4                                                                                                                    | 3.26          | 0.5942     | 2            |        |         |        | Nucleus              |                      | Transcription or translation regulator         |                                                                            |  |  |  |  |
| NAV3_HUMAN  | Neuron navigator 3 OS=Homo sapiens GN=NAV3 PE=1 SV=2                                                                                               | 3.66          | 2.0209     | 2            |        |         |        | Nucleus              |                      | Others                                         |                                                                            |  |  |  |  |
| NCEH1_HUMAN | Neutral cholesterol ester hydrolase 1 OS=Homo sapiens GN=NCEH1 PE=1 SV=3                                                                           | 3.14          | 0.4523     | 7            |        |         |        | Cell membrane        |                      | Metabolism                                     |                                                                            |  |  |  |  |
| NICA_HUMAN  | Nicastrin OS=Homo sapiens GN=NCSTN PE=1 SV=2                                                                                                       | 4.68          | 1.8155     | 3            | M      |         |        | Cell membrane        | Y                    | Protease or protein degradation                | <a href="#">J Biol Chem. 2009 Jan 16;284(3):1373-84. Epub 2008 Nov 20.</a> |  |  |  |  |
| NOS3_HUMAN  | Nitric oxide synthase, endothelial OS=Homo sapiens GN=NOS3 PE=1 SV=3                                                                               | 4.9           | 0.3951     | 6            |        |         |        | Cell membrane        | Y                    | Metabolism                                     | <a href="#">Biochemistry. 1995 Sep 26;34(38):12333-40.</a>                 |  |  |  |  |
| NRCAM_HUMAN | Neuronal cell adhesion molecule OS=Homo sapiens GN=NRCAM PE=1 SV=3                                                                                 | 9.19          | <0.0001    | 2            |        |         |        | Cell membrane        |                      | Cell adhesion or ECM interaction               |                                                                            |  |  |  |  |
| NRP1_HUMAN  | Neuropilin-1 OS=Homo sapiens GN=NRP1 PE=1 SV=3                                                                                                     | 22.29         | 8.6618     | 39           | H      |         | M      | Cell membrane        |                      | Receptor, cell surface molecules               |                                                                            |  |  |  |  |
| NRP2_HUMAN  | Neuropilin-2 OS=Homo sapiens GN=NRP2 PE=1 SV=2                                                                                                     | 5.8           | 2.7944     | 5            |        |         |        | Cell membrane        |                      | Receptor, cell surface molecules               |                                                                            |  |  |  |  |
| NSUN2_HUMAN | tRNA (cytosine-5)-methyltransferase NSUN2 OS=Homo sapiens GN=NSUN2 PE=1 SV=2                                                                       | 2.64          | 0.9908     | 6            |        |         |        | Nucleus              |                      | Transcription or translation regulator         |                                                                            |  |  |  |  |
| NUMA1_HUMAN | Nuclear mitotic apparatus protein 1 OS=Homo sapiens GN=NUMA1 PE=1 SV=2                                                                             | 58.52         | 3.9817     | 4            |        |         |        | Nucleus              |                      | Scaffolding protein                            |                                                                            |  |  |  |  |
| ODO2_HUMAN  | Dihydrolipoyllysine-residue succinyltransferase component of 2-oxoglutarate dehydrogenase complex, mitochondrial OS=Homo sapiens GN=DLST PE=1 SV=3 | 1.96          | 0.565      | 117          |        |         |        | Mitochondrion        |                      | Metabolism                                     |                                                                            |  |  |  |  |
| ODP2_HUMAN  | DLAT; Dihydrolipoyllysine-residue acetyltransferase component of pyruvate dehydrogenase complex, mitochondrial                                     | 7.78          | 2.2783     | 8            |        |         |        | Mitochondrial matrix |                      | Metabolism                                     |                                                                            |  |  |  |  |
| ODPX_HUMAN  | Pyruvate dehydrogenase protein X component, mitochondrial OS=Homo sapiens GN=PDHX PE=1 SV=3                                                        | 11.08         | 2.8249     | 5            |        |         |        | Mitochondrial matrix |                      | Metabolism                                     |                                                                            |  |  |  |  |
| OXSM_HUMAN  | 3-oxoacyl-[acyl-carrier-protein] synthase, mitochondrial OS=Homo sapiens GN=OXSM PE=1 SV=1                                                         | 5.85          | 0.6459     | 2            |        |         | M      | Mitochondrion        |                      | Metabolism                                     |                                                                            |  |  |  |  |

|             |                                                                                                      |               |            | Prior Screen |        |         |         |                          |                      |                                                |                                                                                    |
|-------------|------------------------------------------------------------------------------------------------------|---------------|------------|--------------|--------|---------|---------|--------------------------|----------------------|------------------------------------------------|------------------------------------------------------------------------------------|
|             |                                                                                                      |               |            | Reference #  | 18     | 12      | 13      |                          |                      |                                                |                                                                                    |
|             |                                                                                                      |               |            | Cells        | Du-145 | Jurkat  | Neuro n |                          |                      |                                                |                                                                                    |
|             |                                                                                                      |               |            | Method       | ABE    | 17-ODYA | ABE     |                          |                      |                                                |                                                                                    |
| Protein ID  | Protein Name and Description                                                                         | Ratio (+/-HA) | STDEV(+/-) | #Peptide     |        |         |         | Location                 | Known Palmitoylation | Function Class                                 | References                                                                         |
| P4K2A_HUMAN | Phosphatidylinositol 4-kinase type 2-alpha OS=Homo sapiens GN=P4K2A PE=1 SV=1                        | 26.72         | 9.1088     | 17           | H      | H       |         | Cytoplasm, cell membrane |                      | Metabolism                                     |                                                                                    |
| PANK4_HUMAN | Pantothenate kinase 4 OS=Homo sapiens GN=PANK4 PE=1 SV=1                                             | 11.04         | 5.172      | 2            |        |         |         | Cytoplasm                |                      | Metabolism                                     |                                                                                    |
| PBIP1_HUMAN | Pre-B-cell leukemia transcription factor-interacting protein 1 OS=Homo sapiens GN=PBIP1 PE=1 SV=1    | 1.66          | 1.1599     | 3            |        |         |         | Cytoplasm, Nucleus       |                      | Transcription or translation regulator         |                                                                                    |
| PCD17_HUMAN | Protocadherin-17 OS=Homo sapiens GN=PCDH17 PE=2 SV=2                                                 | 18.08         | 8.2532     | 2            |        |         | M       | Cell membrane            |                      | Cell adhesion or ECM interaction               |                                                                                    |
| PCF11_HUMAN | Pre-mRNA cleavage complex 2 protein Pcf11 OS=Homo sapiens GN=PCF11 PE=1 SV=3                         | 21.12         | 8.5946     | 4            |        |         |         | Nucleus                  |                      | Transcription or translation regulator         |                                                                                    |
| PDLI1_HUMAN | PDZ and LIM domain protein 1 OS=Homo sapiens GN=PDLIM1 PE=1 SV=4                                     | 5.62          | 1.2381     | 17           |        |         |         | Cytoplasm                |                      | Cytoskeleton associated protein                |                                                                                    |
| PECA1_HUMAN | Platelet endothelial cell adhesion molecule OS=Homo sapiens GN=PECAM1 PE=1 SV=1                      | 18.84         | 4.6203     | 124          |        |         |         | Cell membrane            | Y                    | Cell adhesion or ECM interaction               | <a href="#">Thromb Haemost. 2006 Dec;96(6):756-66.</a>                             |
| PECI_HUMAN  | Peroxisomal 3,2-trans-enoyl-CoA isomerase OS=Homo sapiens GN=PECI PE=1 SV=4                          | 5.08          | 2.8347     | 3            |        |         |         | Mitochondrion            |                      | Metabolism                                     |                                                                                    |
| PERI_HUMAN  | Peripherin OS=Homo sapiens GN=PRPH PE=1 SV=2                                                         | 3.7           | 6.1702     | 11           |        |         |         | Cytoplasm                |                      | Cytoskeleton associated protein                |                                                                                    |
| PLCB4_HUMAN | 1-phosphatidylinositol-4,5-bisphosphate phosphodiesterase beta-4 OS=Homo sapiens GN=PLCB4 PE=1 SV=3  | 2.86          | 0.6087     | 3            |        |         |         | Unkown                   |                      | Metabolism                                     |                                                                                    |
| PLD6_HUMAN  | Phospholipase D6 OS=Homo sapiens GN=PLD6 PE=2 SV=1                                                   | 2.89          | 0.8562     | 2            |        |         |         | Mitochondrion            |                      | Metabolism                                     |                                                                                    |
| PLEC_HUMAN  | Plectin OS=Homo sapiens GN=PLEC PE=1 SV=3                                                            | 10.77         | 9.3584     | 5            |        |         |         | Cytoplasm                |                      | Cytoskeleton associated protein                |                                                                                    |
| PLP2_HUMAN  | Proteolipid protein 2 OS=Homo sapiens GN=PLP2 PE=1 SV=1                                              | 4.5           | 6.9994     | 6            | M      |         |         | Cell membrane            |                      | Others                                         |                                                                                    |
| PLS1_HUMAN  | Phospholipid scramblase 1 OS=Homo sapiens GN=PLSCR1 PE=1 SV=1                                        | 16.43         | 7.3806     | 16           | H      |         |         | Cell membrane            | Y                    | Transporter, vesicular or membrane trafficking | <a href="#">Biochemistry. 2003 Feb 11;42(5):1227-33.</a>                           |
| PLS3_HUMAN  | Phospholipid scramblase 3 OS=Homo sapiens GN=PLSCR3 PE=1 SV=2                                        | 2.33          | 0.3753     | 6            | H      |         |         | Cell membrane            | Y                    | Transporter, vesicular or membrane trafficking | <a href="#">Mol Cell Proteomics. 2011 Oct;10(10):M110.006007 Epub 2011 Jul 23.</a> |
| PLS4_HUMAN  | Phospholipid scramblase 4 OS=Homo sapiens GN=PLSCR4 PE=1 SV=2                                        | 29.39         | 10.6352    | 12           |        |         |         | Cell membrane            |                      | Transporter, vesicular or membrane trafficking |                                                                                    |
| PLXB2_HUMAN | Plexin-B2 OS=Homo sapiens GN=PLXNB2 PE=1 SV=3                                                        | 9.09          | 1.8488     | 3            |        |         | H       | Cell membrane            |                      | Receptor, cell surface molecules               |                                                                                    |
| PODXL_HUMAN | Podocalyxin OS=Homo sapiens GN=PODXL PE=1 SV=2                                                       | 9.47          | 16.9328    | 11           |        |         | M       | Cell membrane            |                      | Cell adhesion or ECM interaction               |                                                                                    |
| PPDE1_HUMAN | PPPDE peptidase domain-containing protein 1 OS=Homo sapiens GN=PPPDE1 PE=2 SV=1                      | 11.3          | <0.0001    | 7            |        |         |         | Unknown                  |                      | Others                                         |                                                                                    |
| PPOX_HUMAN  | Protoporphyrinogen oxidase OS=Homo sapiens GN=PPOX PE=1 SV=1                                         | 33.38         | 2.6084     | 6            |        |         |         | Mitochondrion            |                      | Metabolism                                     |                                                                                    |
| PRAF2_HUMAN | PRA1 family protein 2 OS=Homo sapiens GN=PRAF2 PE=1 SV=1                                             | 2.68          | 3.8262     | 19           |        | H       | M       | Endosome membrane        |                      | Transporter, vesicular or membrane trafficking |                                                                                    |
| PRDX5_HUMAN | Peroxisiredoxin-5, mitochondrial OS=Homo sapiens GN=PRDX5 PE=1 SV=3                                  | 1.53          | 0.3337     | 41           |        |         | M       | Cytoplasm                |                      | Metabolism                                     |                                                                                    |
| PRDX6_HUMAN | Peroxisiredoxin-6 OS=Homo sapiens GN=PRDX6 PE=1 SV=3                                                 | 3.67          | 1.0972     | 64           |        | H       |         | Cytoplasm                |                      | Metabolism                                     |                                                                                    |
| PSMD1_HUMAN | 26S proteasome non-ATPase regulatory subunit 1 OS=Homo sapiens GN=PSMD1 PE=1 SV=2                    | 3.86          | 1.3752     | 13           |        |         | M       | Unknown                  |                      | Protease or protein degradation                |                                                                                    |
| PTH2_HUMAN  | Peptidyl-tRNA hydrolase 2, mitochondrial OS=Homo sapiens GN=PTRH2 PE=1 SV=1                          | 3.98          | 0.3805     | 8            | H      | H       |         | Mitochondrion            |                      | Metabolism                                     |                                                                                    |
| PTTG_HUMAN  | Pituitary tumor-transforming gene 1 protein-interacting protein OS=Homo sapiens GN=PTTG1IP PE=1 SV=1 | 5.85          | 0.4905     | 14           | H      | H       |         | Unknown                  |                      | Others                                         |                                                                                    |
| PVR_HUMAN   | Poliovirus receptor OS=Homo sapiens GN=PVR PE=1 SV=2                                                 | 24.58         | 10.4757    | 54           | H      |         |         | Cell membrane, secreted  |                      | Receptor, cell surface molecules               |                                                                                    |
| PVRL2_HUMAN | Poliovirus receptor-related protein 2 OS=Homo sapiens GN=PVRL2 PE=1 SV=1                             | 12.26         | 4.7683     | 11           | H      |         |         | Cell membrane            |                      | Cell adhesion or ECM interaction               |                                                                                    |

|             |                                                                                                            |               |            | Prior Screen |        |         |        |               |   |   |                                        |                                                                                        |  |                      |  |                |  |            |  |
|-------------|------------------------------------------------------------------------------------------------------------|---------------|------------|--------------|--------|---------|--------|---------------|---|---|----------------------------------------|----------------------------------------------------------------------------------------|--|----------------------|--|----------------|--|------------|--|
|             |                                                                                                            |               |            | Reference #  | 18     | 12      | 13     |               |   |   |                                        | Location                                                                               |  | Known Palmitoylation |  | Function Class |  | References |  |
|             |                                                                                                            |               |            | Cells        | Du-145 | Jurkat  | Neuron |               |   |   |                                        |                                                                                        |  |                      |  |                |  |            |  |
|             |                                                                                                            |               |            | Method       | ABE    | 17-ODYA | ABE    |               |   |   |                                        |                                                                                        |  |                      |  |                |  |            |  |
| Protein ID  | Protein Name and Description                                                                               | Ratio (+/-HA) | STDEV(+/-) | #Peptide     |        |         |        |               |   |   |                                        |                                                                                        |  |                      |  |                |  |            |  |
| RAB18_HUMAN | Ras-related protein Rab-18 OS=Homo sapiens GN=RAB18 PE=1 SV=1                                              | 3.28          | 0.3919     | 3            |        |         |        | Cell membrane |   |   | G protein associated regulator         |                                                                                        |  |                      |  |                |  |            |  |
| RAB8B_HUMAN | Ras-related protein Rab-8B OS=Homo sapiens GN=RAB8B PE=1 SV=2                                              | 1.88          | 1.3047     | 11           |        |         |        | Cell membrane |   |   | G protein associated regulator         |                                                                                        |  |                      |  |                |  |            |  |
| RAI3_HUMAN  | Retinoic acid-induced protein 3 OS=Homo sapiens GN=GPRC5A PE=1 SV=2                                        | 19.62         | 7.7167     | 6            | H      |         |        | Cell membrane |   |   | G protein associated regulator         |                                                                                        |  |                      |  |                |  |            |  |
| RALA_HUMAN  | Ras-related protein Ral-A OS=Homo sapiens GN=RALA PE=1 SV=1                                                | 20.52         | 8.2615     | 40           | H      |         | H      | Cell membrane |   |   | G protein associated regulator         |                                                                                        |  |                      |  |                |  |            |  |
| RALB_HUMAN  | Ras-related protein Ral-B OS=Homo sapiens GN=RALB PE=1 SV=1                                                | 20.58         | 7.1147     | 29           | H      |         | H      | Cell membrane |   |   | G protein associated regulator         |                                                                                        |  |                      |  |                |  |            |  |
| RAP1B_HUMAN | Ras-related protein Rap-1b OS=Homo sapiens GN=RAP1B PE=1 SV=1                                              | 4.09          | 3.8084     | 11           |        |         | M      | Cell membrane |   |   | G protein associated regulator         |                                                                                        |  |                      |  |                |  |            |  |
| RAP2A_HUMAN | Ras-related protein Rap-2a OS=Homo sapiens GN=RAP2A PE=1 SV=1                                              | 18.68         | 5.1397     | 42           | H      |         | H      | Cell membrane | Y |   | G protein associated regulator         | <a href="#">Biochem Biophys Res Commun. 2009 Jan 23;378(4):732-7. Epub 2008 Dec 4.</a> |  |                      |  |                |  |            |  |
| RAP2B_HUMAN | Ras-related protein Rap-2b OS=Homo sapiens GN=RAP2B PE=1 SV=1                                              | 18.88         | 5.6659     | 62           | H      |         | H      | Cell membrane | Y |   | G protein associated regulator         | <a href="#">Biochem Biophys Res Commun. 2009 Jan 23;378(4):732-7. Epub 2008 Dec 4.</a> |  |                      |  |                |  |            |  |
| RAP2C_HUMAN | Ras-related protein Rap-2c OS=Homo sapiens GN=RAP2C PE=1 SV=1                                              | 21.18         | 10.3544    | 48           | H      |         | H      | Cell membrane | Y |   | G protein associated regulator         | <a href="#">Biochem Biophys Res Commun. 2009 Jan 23;378(4):732-7. Epub 2008 Dec 4.</a> |  |                      |  |                |  |            |  |
| RASH_HUMAN  | GTPase HRas OS=Homo sapiens GN=HRAS PE=1 SV=1                                                              | 22.51         | 9.9055     | 32           | H      |         | H      | Cell membrane | Y |   | G protein associated regulator         | <a href="#">Cell. 1989 Jun 30;57(7):1167-77.</a>                                       |  |                      |  |                |  |            |  |
| RASK_HUMAN  | GTPase KRas OS=Homo sapiens GN=KRAS PE=1 SV=1                                                              | 18.03         | 6.7606     | 17           | H      |         | H      | Cell membrane | Y |   | G protein associated regulator         | <a href="#">Cell. 1989 Jun 30;57(7):1167-77.</a>                                       |  |                      |  |                |  |            |  |
| RASN_HUMAN  | GTPase NRas OS=Homo sapiens GN=NRAS PE=1 SV=1                                                              | 23.54         | 9.4841     | 37           | H      |         |        | Cell membrane | Y |   | G protein associated regulator         | <a href="#">J Biol Chem. 1996 Sep 20;271(38):23269-76.</a>                             |  |                      |  |                |  |            |  |
| REEP5_HUMAN | Receptor expression-enhancing protein 5 OS=Homo sapiens GN=REEP5 PE=1 SV=3                                 | 13            | 3.3802     | 42           |        | M       |        | Cell membrane |   | H | Others                                 |                                                                                        |  |                      |  |                |  |            |  |
| RELL1_HUMAN | RELT-like protein 1 OS=Homo sapiens GN=RELL1 PE=1 SV=1                                                     | 19.38         | 10.5021    | 19           | H      |         |        | Cell membrane |   |   | Others                                 |                                                                                        |  |                      |  |                |  |            |  |
| RGPD1_HUMAN | RANBP2-like and GRIP domain-containing protein 1/2; RGPD1                                                  | 10.47         | 4.9376     | 2            |        |         |        | Unknown       |   |   | Others                                 |                                                                                        |  |                      |  |                |  |            |  |
| RGS19_HUMAN | Regulator of G-protein signaling 19 OS=Homo sapiens GN=RGS19 PE=1 SV=1                                     | 2.43          | <0.0001    | 3            |        |         | M      | Cell membrane | Y |   | G protein associated regulator         | <a href="#">Proc Natl Acad Sci U S A. 1996 Dec 24;93(26):15203-8.</a>                  |  |                      |  |                |  |            |  |
| RHOB_HUMAN  | Rho-related GTP-binding protein RhoB OS=Homo sapiens GN=RHOB PE=1 SV=1                                     | 5.35          | 3.8041     | 7            | H      |         |        | Cell membrane | Y |   | G protein associated regulator         | <a href="#">J Biol Chem. 1992 Oct 5;267(28):20033-8.</a>                               |  |                      |  |                |  |            |  |
| RHOJ_HUMAN  | Rho-related GTP-binding protein RhoJ OS=Homo sapiens GN=RHOJ PE=1 SV=1                                     | 10.36         | 2.0316     | 5            |        |         |        | Cell membrane |   |   | G protein associated regulator         |                                                                                        |  |                      |  |                |  |            |  |
| RL15_HUMAN  | 60S ribosomal protein L15 OS=Homo sapiens GN=RPL15 PE=1 SV=2                                               | 1.89          | 0.1814     | 3            |        |         | M      | Cytoplasm     |   |   | Transcription or translation regulator |                                                                                        |  |                      |  |                |  |            |  |
| RL35_HUMAN  | 60S ribosomal protein L35 OS=Homo sapiens GN=RPL35 PE=1 SV=2                                               | 1.57          | 0.1709     | 7            |        |         |        | Cytoplasm     |   |   | Transcription or translation regulator |                                                                                        |  |                      |  |                |  |            |  |
| RL5_HUMAN   | 60S ribosomal protein L5                                                                                   | 1.69          | 0.4839     | 2            | M      | M       | M      | Cytoplasm     |   |   | Transcription or translation regulator |                                                                                        |  |                      |  |                |  |            |  |
| RMP_HUMAN   | Unconventional prefoldin RPB5 interactor OS=Homo sapiens GN=RMP PE=1 SV=3                                  | 16.14         | 1.4152     | 2            |        |         | M      | Nucleus       |   |   | Scaffolding protein                    |                                                                                        |  |                      |  |                |  |            |  |
| RPN2_HUMAN  | Dolichyl-diphosphooligosaccharide--protein glycosyltransferase subunit 2 OS=Homo sapiens GN=RPN2 PE=1 SV=3 | 1.72          | 0.0223     | 17           | M      |         | M      | ER membrane   |   |   | Phosphorylation or glycosylation       |                                                                                        |  |                      |  |                |  |            |  |
| RRAS_HUMAN  | Ras-related protein R-Ras OS=Homo sapiens GN=RRAS PE=1 SV=1                                                | 23.67         | 6.1036     | 73           | H      | H       | H      | Cell membrane | Y |   | G protein associated regulator         | <a href="#">J Cell Sci. 2003 Sep 15;116(Pt 18):3729-38. Epub 2003 Jul 30.</a>          |  |                      |  |                |  |            |  |
| RRAS2_HUMAN | Ras-related protein R-Ras2 OS=Homo sapiens GN=RRAS2 PE=1 SV=1                                              | 24.19         | 9.7482     | 69           | H      |         | H      | Cell membrane |   |   | G protein associated regulator         |                                                                                        |  |                      |  |                |  |            |  |
| RS11_HUMAN  | 40S ribosomal protein S11 OS=Homo sapiens GN=RPS11 PE=1 SV=3                                               | 2.84          | 0.9836     | 18           | M      |         |        | Cytoplasm     |   |   | Transcription or translation regulator |                                                                                        |  |                      |  |                |  |            |  |
| RS15_HUMAN  | 40S ribosomal protein S15 OS=Homo sapiens GN=RPS15 PE=1 SV=2                                               | 2.14          | 2.5207     | 8            |        |         |        | Cytoplasm     |   |   | Transcription or translation regulator |                                                                                        |  |                      |  |                |  |            |  |
| RS24_HUMAN  | 40S ribosomal protein S24 OS=Homo sapiens GN=RPS24 PE=1 SV=1                                               | 1.78          | 0.0975     | 17           |        |         | M      | Cytoplasm     |   |   | Transcription or translation regulator |                                                                                        |  |                      |  |                |  |            |  |



|             |                                                                                              |               |            | Prior Screen |        |         |         |                      |               |   |                                                |                                                                        |  |                |  |            |  |
|-------------|----------------------------------------------------------------------------------------------|---------------|------------|--------------|--------|---------|---------|----------------------|---------------|---|------------------------------------------------|------------------------------------------------------------------------|--|----------------|--|------------|--|
|             |                                                                                              |               |            | Reference #  | 18     | 12      | 13      |                      |               |   |                                                | Location                                                               |  | Function Class |  | References |  |
|             |                                                                                              |               |            | Cells        | Du-145 | Jurkat  | Neuro n |                      |               |   |                                                |                                                                        |  |                |  |            |  |
|             |                                                                                              |               |            | Method       | ABE    | 17-ODYA | ABE     |                      |               |   |                                                |                                                                        |  |                |  |            |  |
| Protein ID  | Protein Name and Description                                                                 | Ratio (+/-HA) | STDEV(+/-) | #Peptide     |        |         |         | Known Palmitoylation |               |   |                                                |                                                                        |  |                |  |            |  |
| RS27A_HUMAN | Ubiquitin-40S ribosomal protein S27a OS=Homo sapiens GN=RPS27A PE=1 SV=2                     | 2.54          | 0.095      | 83           | M      |         |         |                      | Cytoplasm     |   | Transcription or translation regulator         |                                                                        |  |                |  |            |  |
| RTN1_HUMAN  | Reticulon-1 OS=Homo sapiens GN=RTN1 PE=1 SV=1                                                | 2.41          | 0.17       | 5            |        |         |         |                      | ER membrane   |   | Transporter, vesicular or membrane trafficking |                                                                        |  |                |  |            |  |
| RTN3_HUMAN  | Reticulon-3 OS=Homo sapiens GN=RTN3 PE=1 SV=2                                                | 2.69          | 0.1604     | 19           |        |         | M       |                      | ER membrane   |   | Transporter, vesicular or membrane trafficking |                                                                        |  |                |  |            |  |
| RTN4_HUMAN  | Reticulon-4 OS=Homo sapiens GN=RTN4 PE=1 SV=2                                                | 6.18          | 1.2065     | 66           |        |         |         |                      | ER membrane   |   | Transporter, vesicular or membrane trafficking |                                                                        |  |                |  |            |  |
| S1PR1_HUMAN | Sphingosine 1-phosphate receptor 1 OS=Homo sapiens GN=S1PR1 PE=1 SV=2                        | 4.66          | 0.1614     | 2            |        |         |         | Y                    | Cell membrane |   | Receptor, cell surface molecules               | <a href="#">Genes Cells. 2009 Aug;14(8):911-23. Epub 2009 Jul 10.</a>  |  |                |  |            |  |
| S22A8_HUMAN | Solute carrier family 22 member 8                                                            | 5.35          | 0.8288     | 2            |        |         |         |                      | Cell membrane |   | Transporter, vesicular or membrane trafficking |                                                                        |  |                |  |            |  |
| S61A1_HUMAN | Protein transport protein Sec61 subunit alpha isoform 1 OS=Homo sapiens GN=SEC61A1 PE=1 SV=2 | 3.02          | 1.142      | 2            |        |         |         |                      | ER membrane   |   | Transporter, vesicular or membrane trafficking |                                                                        |  |                |  |            |  |
| SAE2_HUMAN  | SUMO-activating enzyme subunit 2 OS=Homo sapiens GN=UBA2 PE=1 SV=2                           | 1.79          | 0.3398     | 15           |        |         |         |                      | Nucleus       |   | Others                                         |                                                                        |  |                |  |            |  |
| SC11A_HUMAN | Signal peptidase complex catalytic subunit SEC11A OS=Homo sapiens GN=SEC11A PE=1 SV=1        | 2.13          | 0.1929     | 7            |        |         |         |                      | ER membrane   |   | Protease or protein degradation                |                                                                        |  |                |  |            |  |
| SCAM1_HUMAN | Secretory carrier-associated membrane protein 1 OS=Homo sapiens GN=SCAMP1 PE=1 SV=2          | 23.61         | 8.3367     | 7            | H      | H       | H       |                      | Golgi         |   | Transporter, vesicular or membrane trafficking |                                                                        |  |                |  |            |  |
| SCAM2_HUMAN | Secretory carrier-associated membrane protein 2 OS=Homo sapiens GN=SCAMP2 PE=1 SV=2          | 18.03         | 2.132      | 9            | H      | H       | M       |                      | Golgi         |   | Transporter, vesicular or membrane trafficking |                                                                        |  |                |  |            |  |
| SCAM3_HUMAN | Secretory carrier-associated membrane protein 3 OS=Homo sapiens GN=SCAMP3 PE=1 SV=3          | 15.67         | 4.5005     | 39           | H      | H       | H       |                      | Golgi         |   | Transporter, vesicular or membrane trafficking |                                                                        |  |                |  |            |  |
| SCRB1_HUMAN | Scavenger receptor class B member 1 OS=Homo sapiens GN=SCRAB1 PE=1 SV=1                      | 21.73         | 7.9393     | 15           | H      |         |         |                      | Cell membrane | Y | Receptor, cell surface molecules               | <a href="#">J Biol Chem. 1996 Sep 13;271(37):22315-20.</a>             |  |                |  |            |  |
| SCRB2_HUMAN | Lysosome membrane protein 2 OS=Homo sapiens GN=SCRAB2 PE=1 SV=2                              | 17.12         | 2.9779     | 72           | H      |         | H       |                      | Lysosome      |   | Receptor, cell surface molecules               |                                                                        |  |                |  |            |  |
| SCRIB_HUMAN | Protein scribble homolog OS=Homo sapiens GN=SCRIB PE=1 SV=4                                  | 14.06         | 4.6675     | 13           | H      | H       | M       |                      | Cell membrane |   | Scaffolding protein                            |                                                                        |  |                |  |            |  |
| SELO_HUMAN  | Selenoprotein O OS=Homo sapiens GN=SELO PE=2 SV=3                                            | 2.21          | <0.0001    | 2            |        |         |         |                      | Unknown       |   | Others                                         |                                                                        |  |                |  |            |  |
| SELT_HUMAN  | Selenoprotein T OS=Homo sapiens GN=SELT PE=2 SV=2                                            | 5.57          | 0.9737     | 7            |        |         |         |                      | Unknown       |   | Others                                         |                                                                        |  |                |  |            |  |
| SEP15_HUMAN | 15 kDa selenoprotein OS=Homo sapiens GN=SEP15 PE=1 SV=3                                      | 4.67          | 1.2882     | 3            |        |         |         |                      | ER membrane   |   | Others                                         |                                                                        |  |                |  |            |  |
| SERC1_HUMAN | Serine incorporator 1 OS=Homo sapiens GN=SERINC1 PE=1 SV=1                                   | 9.5           | <0.0001    | 4            | M      |         |         |                      | ER membrane   |   | Metabolism                                     |                                                                        |  |                |  |            |  |
| SERPH_HUMAN | Serpin H1                                                                                    | 1.64          | 0.0759     | 2            |        |         | M       |                      | ER membrane   |   | Chaperone                                      |                                                                        |  |                |  |            |  |
| SFPQ_HUMAN  | Splicing factor, proline- and glutamine-rich OS=Homo sapiens GN=SFPQ PE=1 SV=2               | 1.5           | 0.387      | 9            |        |         | M       |                      | Nucleus       |   | Transcription or translation regulator         |                                                                        |  |                |  |            |  |
| SLFN5_HUMAN | Schlafen family member 5 OS=Homo sapiens GN=SLFN5 PE=1 SV=1                                  | 16.68         | 2.0632     | 2            |        |         |         |                      | Unknown       |   | Others                                         |                                                                        |  |                |  |            |  |
| SNP23_HUMAN | Synaptosomal-associated protein 23 OS=Homo sapiens GN=SNAP23 PE=1 SV=1                       | 18.4          | 7.4899     | 23           | H      | H       |         |                      | Cell membrane | Y | Transporter, vesicular or membrane trafficking | <a href="#">Biochem Biophys Res Commun. 1999 May 10;258(2):407-10.</a> |  |                |  |            |  |
| SORC2_HUMAN | VPS10 domain-containing receptor SorCS2 OS=Homo sapiens GN=SORCS2 PE=1 SV=3                  | 20.35         | 0.6328     | 2            |        |         |         |                      | Cell membrane |   | Others                                         |                                                                        |  |                |  |            |  |
| STML3_HUMAN | Stomatin-like protein 3                                                                      | 5.21          | 0.9904     | 3            |        |         |         |                      | Cell membrane |   | Others                                         |                                                                        |  |                |  |            |  |
| STOM_HUMAN  | Erythrocyte band 7 integral membrane protein OS=Homo sapiens GN=STOM PE=1 SV=3               | 16.02         | 3.8221     | 148          | H      | H       |         |                      | Cell membrane | Y | Others                                         | <a href="#">FEBS Lett. 1999 Apr 23;449(2-3):101-4.</a>                 |  |                |  |            |  |

|             |                                                                                                                 |               |            | Prior Screen |        |         |         |                               |                      |                                                |                                                                                                   |
|-------------|-----------------------------------------------------------------------------------------------------------------|---------------|------------|--------------|--------|---------|---------|-------------------------------|----------------------|------------------------------------------------|---------------------------------------------------------------------------------------------------|
|             |                                                                                                                 |               |            | Reference #  | 18     | 12      | 13      |                               |                      |                                                |                                                                                                   |
|             |                                                                                                                 |               |            | Cells        | Du-145 | Jurkat  | Neuro n |                               |                      |                                                |                                                                                                   |
|             |                                                                                                                 |               |            | Method       | ABE    | 17-ODYA | ABE     |                               |                      |                                                |                                                                                                   |
| Protein ID  | Protein Name and Description                                                                                    | Ratio (+/-HA) | STDEV(+/-) | #Peptide     |        |         |         | Location                      | Known Palmitoylation | Function Class                                 | References                                                                                        |
| STT3A_HUMAN | Dolichyl-diphosphooligosaccharide--protein glycosyltransferase subunit STT3A OS=Homo sapiens GN=STT3A PE=1 SV=2 | 1.74          | 0.1953     | 3            |        |         |         | ER membrane                   |                      | Phosphorylation or glycosylation               |                                                                                                   |
| STX10_HUMAN | Syntaxin-10 OS=Homo sapiens GN=STX10 PE=1 SV=1                                                                  | 6.56          | 2.6165     | 5            | M      | H       |         | Golgi                         |                      | Transporter, vesicular or membrane trafficking |                                                                                                   |
| STX11_HUMAN | Syntaxin-11 OS=Homo sapiens GN=STX11 PE=1 SV=1                                                                  | 18.85         | 2.3659     | 5            |        |         |         | Cell membrane                 |                      | Transporter, vesicular or membrane trafficking |                                                                                                   |
| STX12_HUMAN | Syntaxin-12 OS=Homo sapiens GN=STX12 PE=1 SV=1                                                                  | 32.67         | 5.6257     | 24           |        | H       | H       | Cell membrane                 |                      | Transporter, vesicular or membrane trafficking |                                                                                                   |
| STX6_HUMAN  | Syntaxin-6 OS=Homo sapiens GN=STX6 PE=1 SV=1                                                                    | 5.47          | 0.3969     | 11           | H      | H       | H       | Cell membrane                 |                      | Transporter, vesicular or membrane trafficking |                                                                                                   |
| SUSD5_HUMAN | Sushi domain-containing protein 5 OS=Homo sapiens GN=SUSD5 PE=1 SV=3                                            | 29.78         | 8.0197     | 2            |        |         |         | Cell membrane                 |                      | Others                                         |                                                                                                   |
| SYAC_HUMAN  | Alanyl-tRNA synthetase, cytoplasmic OS=Homo sapiens GN=AARS PE=1 SV=2                                           | 10.57         | 2.7566     | 5            |        |         |         | Cytoplasm                     |                      | Metabolism                                     |                                                                                                   |
| SYDM_HUMAN  | Aspartyl-tRNA synthetase, mitochondrial OS=Homo sapiens GN=DARS2 PE=1 SV=1                                      | 17.43         | 6.0376     | 2            |        |         |         | Mitochondrion                 |                      | Metabolism                                     |                                                                                                   |
| SYWC_HUMAN  | Tryptophanyl-tRNA synthetase, cytoplasmic OS=Homo sapiens GN=WARS PE=1 SV=2                                     | 1.65          | 0.4433     | 7            |        |         |         | Cytoplasm                     |                      | Metabolism                                     |                                                                                                   |
| T126A_HUMAN | Transmembrane protein 126A OS=Homo sapiens GN=TMEM126A PE=1 SV=1                                                | 1.99          | 0.3122     | 3            |        |         |         | Mitochondrion                 |                      | Others                                         |                                                                                                   |
| T184C_HUMAN | Transmembrane protein 184C OS=Homo sapiens GN=TMEM184C PE=2 SV=2                                                | 4.99          | 2.0142     | 2            |        |         |         | Cell membrane                 |                      | Others                                         |                                                                                                   |
| T4S1_HUMAN  | Transmembrane 4 L6 family member 1 OS=Homo sapiens GN=TM4SF1 PE=1 SV=1                                          | 24.35         | 2.3225     | 16           |        |         |         | Cell membrane                 |                      | Others                                         |                                                                                                   |
| TALDO_HUMAN | Transaldolase OS=Homo sapiens GN=TALDO1 PE=1 SV=2                                                               | 3.3           | 3.3394     | 3            |        |         |         | Cytoplasm                     |                      | Metabolism                                     |                                                                                                   |
| TFB2M_HUMAN | Dimethyladenosine transferase 2, mitochondrial OS=Homo sapiens GN=TFB2M PE=1 SV=1                               | 4.43          | 0.8662     | 2            |        |         |         | Mitochondrion                 |                      | Metabolism                                     |                                                                                                   |
| TFR1_HUMAN  | Transferrin receptor protein 1 OS=Homo sapiens GN=TFRC PE=1 SV=2                                                | 11.65         | 3.168      | 90           | H      | H       |         | Cell membrane                 | Y                    | Receptor, cell surface molecules               | <a href="https://pubmed.ncbi.nlm.nih.gov/1664455/">J Biol Chem. 1990 Sep 25;265(27):16644-55.</a> |
| THIC_HUMAN  | Acetyl-CoA acetyltransferase, cytosolic OS=Homo sapiens GN=ACAT2 PE=1 SV=2                                      | 4.86          | 0.9801     | 41           |        |         |         | Cytoplasm                     |                      | Metabolism                                     |                                                                                                   |
| THIK_HUMAN  | 3-ketoacyl-CoA thiolase, peroxisomal OS=Homo sapiens GN=ACAA1 PE=1 SV=2                                         | 2.04          | 0.1931     | 13           |        |         |         | Peroxisome                    |                      | Metabolism                                     |                                                                                                   |
| THIL_HUMAN  | Acetyl-CoA acetyltransferase, mitochondrial OS=Homo sapiens GN=ACAT1 PE=1 SV=1                                  | 2.45          | 0.3108     | 60           |        |         |         | Mitochondrion                 |                      | Metabolism                                     |                                                                                                   |
| THTM_HUMAN  | 3-mercaptopyruvate sulfurtransferase OS=Homo sapiens GN=MPST PE=1 SV=3                                          | 8.43          | 2.5477     | 38           |        |         | H       | Cytoplasm                     |                      | Metabolism                                     |                                                                                                   |
| THTR_HUMAN  | Thiosulfate sulfurtransferase OS=Homo sapiens GN=TST PE=1 SV=4                                                  | 11.71         | 2.4711     | 3            |        |         |         | Mitochondrion                 |                      | Metabolism                                     |                                                                                                   |
| TITIN_HUMAN | Titin OS=Homo sapiens GN=TTN PE=1 SV=2                                                                          | 25.67         | 16.541     | 3            |        | M       |         | Cytoplasm                     |                      | Cytoskeleton associated protein                |                                                                                                   |
| TM109_HUMAN | Transmembrane protein 109 OS=Homo sapiens GN=TMEM109 PE=1 SV=1                                                  | 2.66          | 0.2977     | 5            |        |         |         | Nucleus membrane, ER membrane |                      | Others                                         |                                                                                                   |
| TM222_HUMAN | Transmembrane protein 222 OS=Homo sapiens GN=TMEM222 PE=1 SV=2                                                  | 12.09         | 2.8716     | 4            |        |         |         | Cell membrane                 |                      | Others                                         |                                                                                                   |
| TM63A_HUMAN | Transmembrane protein 63A OS=Homo sapiens GN=TMEM63A PE=1 SV=3                                                  | 25.67         | 16.541     | 6            | M      | M       |         | Lysosome membrane             |                      | Others                                         |                                                                                                   |
| TMEDA_HUMAN | Transmembrane emp24 domain-containing protein 10 OS=Homo sapiens GN=TMED10 PE=1 SV=2                            | 2.14          | 0.2655     | 3            |        |         | M       | Golgi, ER membrane            |                      | Transporter, vesicular or membrane trafficking |                                                                                                   |
| TMM98_HUMAN | Transmembrane protein 98 OS=Homo sapiens GN=TMEM98 PE=2 SV=1                                                    | 33.38         | 16.1485    | 2            |        |         |         | Membrane                      |                      | Others                                         |                                                                                                   |
| TMTC3_HUMAN | Transmembrane and TPR repeat-containing protein 3                                                               | 16.14         | 1.4152     | 2            |        |         |         | Membrane                      |                      | Others                                         |                                                                                                   |

|             |                                                                                              |               |            | Prior Screen |        |         |         |                        |                      |                                                |                                                                                         |  |  |  |  |
|-------------|----------------------------------------------------------------------------------------------|---------------|------------|--------------|--------|---------|---------|------------------------|----------------------|------------------------------------------------|-----------------------------------------------------------------------------------------|--|--|--|--|
|             |                                                                                              |               |            | Reference #  | 18     | 12      | 13      |                        |                      |                                                |                                                                                         |  |  |  |  |
|             |                                                                                              |               |            | Cells        | Du-145 | Jurkat  | Neuro n |                        |                      |                                                |                                                                                         |  |  |  |  |
|             |                                                                                              |               |            | Method       | ABE    | 17-ODYA | ABE     |                        |                      |                                                |                                                                                         |  |  |  |  |
| Protein ID  | Protein Name and Description                                                                 | Ratio (+/-HA) | STDEV(+/-) | #Peptide     |        |         |         | Location               | Known Palmitoylation | Function Class                                 | References                                                                              |  |  |  |  |
|             | OS=Homo sapiens GN=TMTC3 PE=1 SV=2                                                           |               |            |              |        |         |         |                        |                      |                                                |                                                                                         |  |  |  |  |
| TMX1_HUMAN  | Thioredoxin-related transmembrane protein 1 OS=Homo sapiens GN=TMX1 PE=1 SV=1                | 21.28         | 9.0688     | 26           |        |         |         | ER membrane            | Y                    | Metabolism                                     | <a href="#">EMBO J. 2011 Nov 1. doi: 10.1038/emboj.2011.384 . [Epub ahead of print]</a> |  |  |  |  |
| TMX3_HUMAN  | Protein disulfide-isomerase TMX3 OS=Homo sapiens GN=TMX3 PE=1 SV=2                           | 9.1           | 3.2985     | 16           |        |         |         | ER membrane            |                      | Metabolism                                     |                                                                                         |  |  |  |  |
| TMX4_HUMAN  | Thioredoxin-related transmembrane protein 4 OS=Homo sapiens GN=TMX4 PE=1 SV=1                | 21.63         | 7.9342     | 13           |        |         |         | ER membrane            |                      | Metabolism                                     |                                                                                         |  |  |  |  |
| TNR12_HUMAN | Tumor necrosis factor receptor superfamily member 12A OS=Homo sapiens GN=TNFRSF12A PE=1 SV=1 | 16.71         | 21.6335    | 7            |        |         |         | Cell membrane          |                      | Receptor, cell surface molecules               |                                                                                         |  |  |  |  |
| TPBG_HUMAN  | Trophoblast glycoprotein OS=Homo sapiens GN=TPBG PE=1 SV=1                                   | 8.85          | 6.956      | 5            | H      |         |         | Cell membrane          |                      | Others                                         |                                                                                         |  |  |  |  |
| TPPC3_HUMAN | Trafficking protein particle complex subunit 3 OS=Homo sapiens GN=TRAPPC3 PE=1 SV=1          | 31.63         | 6.0602     | 50           | H      |         |         | Golgi, ER              | Y                    | Transporter, vesicular or membrane trafficking | <a href="#">EMBO J. 2005 Mar 9;24(5):875-84. Epub 2005 Feb 3.</a>                       |  |  |  |  |
| TR10B_HUMAN | Tumor necrosis factor receptor superfamily member 10B OS=Homo sapiens GN=TNFRSF10B PE=1 SV=1 | 33.27         | 8.7389     | 9            | H      |         |         | Cell membrane          |                      | Receptor, cell surface molecules               |                                                                                         |  |  |  |  |
| TRBM_HUMAN  | Thrombomodulin OS=Homo sapiens GN=THBD PE=1 SV=2                                             | 17.67         | 2.646      | 2            |        |         |         | Cell membrane          |                      | Receptor, cell surface molecules               |                                                                                         |  |  |  |  |
| TRXR1_HUMAN | Thioredoxin reductase 1, cytoplasmic OS=Homo sapiens GN=TXNRD1 PE=1 SV=3                     | 1.76          | 0.1869     | 88           |        |         |         | Cytoplasm              |                      | Metabolism                                     |                                                                                         |  |  |  |  |
| TSN14_HUMAN | Tetraspanin-14 OS=Homo sapiens GN=TSPAN14 PE=2 SV=1                                          | 24.86         | 14.4482    | 11           | M      |         |         | Cell membrane          |                      | Others                                         |                                                                                         |  |  |  |  |
| TSN3_HUMAN  | Tetraspanin-3 OS=Homo sapiens GN=TSPAN3 PE=2 SV=1                                            | 11.7          | 0.8296     | 5            |        |         |         | Cell membrane          |                      | Cell adhesion or ECM interaction               |                                                                                         |  |  |  |  |
| TSN6_HUMAN  | Tetraspanin-6 OS=Homo sapiens GN=TSPAN6 PE=1 SV=1                                            | 2.34          | 0.687      | 6            |        |         |         | Cell membrane          |                      | Others                                         |                                                                                         |  |  |  |  |
| TTL12_HUMAN | Tubulin-tyrosine ligase-like protein 12 OS=Homo sapiens GN=TTLL12 PE=1 SV=2                  | 3.47          | 0.4975     | 9            |        |         |         | Unknown                |                      | Others                                         |                                                                                         |  |  |  |  |
| TTYH3_HUMAN | Protein tweety homolog 3 OS=Homo sapiens GN=TTYH3 PE=1 SV=3                                  | 10.42         | 2.5107     | 16           | H      |         | H       | Cell membrane          |                      | Transporter, vesicular or membrane trafficking |                                                                                         |  |  |  |  |
| TXTP_HUMAN  | Tricarboxylate transport protein, mitochondrial OS=Homo sapiens GN=SLC25A1 PE=1 SV=2         | 1.86          | 1.2073     | 2            |        | M       |         | Mitochondrial membrane |                      | Transporter, vesicular or membrane trafficking |                                                                                         |  |  |  |  |
| UB2G1_HUMAN | Ubiquitin-conjugating enzyme E2 G1 OS=Homo sapiens GN=UBE2G1 PE=1 SV=3                       | 5.38          | 2.0968     | 2            |        |         |         | Unknown                |                      | Protease or protein degradation                |                                                                                         |  |  |  |  |
| UB2G2_HUMAN | Ubiquitin-conjugating enzyme E2 G2 OS=Homo sapiens GN=UBE2G2 PE=1 SV=1                       | 3.18          | 0.1578     | 4            |        |         |         | Unknown                |                      | Protease or protein degradation                |                                                                                         |  |  |  |  |
| UB2L3_HUMAN | Ubiquitin-conjugating enzyme E2 L3 OS=Homo sapiens GN=UBE2L3 PE=1 SV=1                       | 2.34          | 0.687      | 64           |        |         |         | Unknown                |                      | Protease or protein degradation                |                                                                                         |  |  |  |  |
| UB2L6_HUMAN | Ubiquitin/ISG15-conjugating enzyme E2 L6 OS=Homo sapiens GN=UBE2L6 PE=1 SV=4                 | 4.78          | 0.8748     | 5            |        |         |         | Unknown                |                      | Protease or protein degradation                |                                                                                         |  |  |  |  |
| UB2V1_HUMAN | Ubiquitin-conjugating enzyme E2 variant 1 OS=Homo sapiens GN=UBE2V1 PE=1 SV=2                | 1.51          | 0.5617     | 5            |        |         |         | Unknown                |                      | Protease or protein degradation                |                                                                                         |  |  |  |  |
| UBC12_HUMAN | NEDD8-conjugating enzyme Ubc12 OS=Homo sapiens GN=UBE2M PE=1 SV=1                            | 2.69          | 0.318      | 5            |        |         |         | Unknown                |                      | Protease or protein degradation                |                                                                                         |  |  |  |  |
| UBE2K_HUMAN | Ubiquitin-conjugating enzyme E2 K OS=Homo sapiens GN=UBE2K PE=1 SV=3                         | 6.1           | 0.4924     | 18           |        |         |         | Unknown                |                      | Protease or protein degradation                |                                                                                         |  |  |  |  |
| UBE2N_HUMAN | Ubiquitin-conjugating enzyme E2 N OS=Homo sapiens GN=UBE2N PE=1 SV=1                         | 6.56          | 1.9147     | 47           |        |         |         | Unknown                |                      | Protease or protein degradation                |                                                                                         |  |  |  |  |
| UBIQ_HUMAN  | Ubiquitin                                                                                    | 2.42          | 0.1716     | 6            |        |         |         | Cytoplasm              |                      | Protease or protein degradation                |                                                                                         |  |  |  |  |
| UBR4_HUMAN  | E3 ubiquitin-protein ligase UBR4 OS=Homo sapiens GN=UBR4 PE=1 SV=1                           | 27.36         | 2.1717     | 3            |        |         |         | Cytoplasm              |                      | Protease or protein degradation                |                                                                                         |  |  |  |  |
| UCRI_HUMAN  | Cytochrome b-c1 complex subunit Rieske, mitochondrial OS=Homo sapiens GN=UQCRCF1 PE=1 SV=2   | 2.06          | 0.1126     | 2            |        |         | M       | Mitochondrion          |                      | Metabolism                                     |                                                                                         |  |  |  |  |

|             |                                                                                        |               |            | Prior Screen |        |         |         |                    |                      |                                                |            |
|-------------|----------------------------------------------------------------------------------------|---------------|------------|--------------|--------|---------|---------|--------------------|----------------------|------------------------------------------------|------------|
|             |                                                                                        |               |            | Reference #  | 18     | 12      | 13      |                    |                      |                                                |            |
|             |                                                                                        |               |            | Cells        | Du-145 | Jurkat  | Neuro n |                    |                      |                                                |            |
|             |                                                                                        |               |            | Method       | ABE    | 17-ODYA | ABE     |                    |                      |                                                |            |
| Protein ID  | Protein Name and Description                                                           | Ratio (+/-HA) | STDEV(+/-) | #Peptide     |        |         |         | Location           | Known Palmitoylation | Function Class                                 | References |
| UE2NL_HUMAN | Putative ubiquitin-conjugating enzyme E2 N-like                                        | 5.05          | 1.2635     | 16           |        |         |         | Unknown            |                      | Protease or protein degradation                |            |
| UFC1_HUMAN  | Ubiquitin-fold modifier-conjugating enzyme 1 OS=Homo sapiens GN=UFC1 PE=1 SV=3         | 3.02          | 0.3213     | 4            |        |         |         | Unknown            |                      | Protease or protein degradation                |            |
| VAMP3_HUMAN | Vesicle-associated membrane protein 3 OS=Homo sapiens GN=VAMP3 PE=1 SV=3               | 39.33         | 18.9501    | 55           | H      | H       |         | Cell membrane      |                      | Transporter, vesicular or membrane trafficking |            |
| VAMP4_HUMAN | Vesicle-associated membrane protein 4 OS=Homo sapiens GN=VAMP4 PE=1 SV=2               | 47.81         | 20.3333    | 16           | M      |         | H       | Golgi              |                      | Transporter, vesicular or membrane trafficking |            |
| VAMP5_HUMAN | Vesicle-associated membrane protein 5 OS=Homo sapiens GN=VAMP5 PE=1 SV=1               | 34.59         | 16.0758    | 33           |        | M       |         | Cell membrane      |                      | Transporter, vesicular or membrane trafficking |            |
| VAMP7_HUMAN | Vesicle-associated membrane protein 7 OS=Homo sapiens GN=VAMP7 PE=1 SV=3               | 29.5          | 11.4987    | 11           | H      |         | M       | Cell membrane      |                      | Transporter, vesicular or membrane trafficking |            |
| VATA_HUMAN  | V-type proton ATPase catalytic subunit A OS=Homo sapiens GN=ATP6V1A PE=1 SV=2          | 2.06          | 0.1126     | 36           |        |         |         | Cell membrane      |                      | Metabolism                                     |            |
| VDAC3_HUMAN | Voltage-dependent anion-selective channel protein 3 OS=Homo sapiens GN=VDAC3 PE=1 SV=1 | 1.62          | 1.65       | 0.4874       |        |         | M       | Mitochondrion      |                      | Transporter, vesicular or membrane trafficking |            |
| VIGLN_HUMAN | Vigilin OS=Homo sapiens GN=HDLBP PE=1 SV=2                                             | 2.06          | 0.0213     | 13           |        |         |         | Cytoplasm, Nucleus |                      | Metabolism                                     |            |
| VWF_HUMAN   | von Willebrand factor OS=Homo sapiens GN=VWF PE=1 SV=3                                 | 3.07          | 2.61       | 0.3172       |        |         |         | Secreted           |                      | Cell adhesion or ECM interaction               |            |
| ZBED5_HUMAN | Zinc finger BED domain-containing protein 5 OS=Homo sapiens GN=ZBED5 PE=1 SV=2         | 16.68         | 9.6735     | 2            |        |         |         | Unknown            |                      | Others                                         |            |
| ZC3H6_HUMAN | Zinc finger CCH domain-containing protein 6 OS=Homo sapiens GN=ZC3H6 PE=2 SV=1         | 3.42          | 0.1963     | 3            |        |         |         | Unknown            |                      | Others                                         |            |
| ZDH13_HUMAN | Palmitoyltransferase ZDHC13 OS=Homo sapiens GN=ZDHC13 PE=2 SV=3                        | 6.88          | 2.1593     | 8            |        |         |         | Golgi              |                      | Others (Palmitoyltransferase)                  |            |
| ZN426_HUMAN | Zinc finger protein 426                                                                | 17.1          | 0.3625     | 2            |        |         |         | Nucleus            |                      | Transcription or translation regulator         |            |
| ZN806_HUMAN | Zinc finger protein 806                                                                | 31            | 7.0619     | 2            |        |         |         | Nucleus            |                      | Transcription or translation regulator         |            |
| ZN827_HUMAN | Zinc finger protein 827 OS=Homo sapiens GN=ZNF827 PE=2 SV=1                            | 22.11         | <0.0001    | 7            |        |         |         | Nucleus            |                      | Transcription or translation regulator         |            |

Online-Table III

Palmitoylation candidates increased or decreased by insulin. Those implicated in membrane trafficking, cell migration, or angiogenesis are shown in bold.

| Protein name                                                                         | SILAC ratio (+/- insulin) | P value |
|--------------------------------------------------------------------------------------|---------------------------|---------|
| FIG4 Polyphosphoinositide phosphatase                                                | 71.0                      | 0.0343  |
| KIF3B Kinesin-like protein                                                           | 57.4                      | <0.0001 |
| Protein SLC7A6OS                                                                     | 53.1                      | 0.3090  |
| MAML3 Mastermind-like protein 3                                                      | 50.7                      | 0.0296  |
| Uncharacterized protein C1orf131                                                     | 49.4                      | <0.0001 |
| DPPA2 Developmental pluripotency-associated protein 2                                | 34.7                      | <0.0001 |
| Zinc finger BED domain-containing protein 5                                          | 33.1                      | 0.0152  |
| Transcription elongation regulator 1                                                 | 22.9                      | 0.0494  |
| <b>PA1B3 Platelet-activating factor acetylhydrolase IB subunit gamma</b>             | 21                        | 0.0083  |
| Ataxin-7                                                                             | 19.3                      | <0.0001 |
| Microtubule-actin cross-linking factor 1                                             | 8.3                       | <0.0001 |
| Autophagy-related protein 16-1                                                       | 7.5                       | <0.0001 |
| Fructose-1,6-bisphosphatase isozyme 2                                                | 7.0                       | 0.0196  |
| SH3 domain and tetratricopeptide repeats-containing protein 1                        | 6.6                       | 0.1832  |
| <b>Ras-related protein Rab-18</b>                                                    | 4.9                       | 0.5040  |
| <b>Lymphatic vessel endothelial hyaluronic acid receptor 1</b>                       | 2.7                       | 0.0001  |
| <b>T4S1 Transmembrane 4 L6 family member 1</b>                                       | 2.3                       | 0.1157  |
| <b>FBLN3 EGF-containing fibulin-like extracellular matrix protein 1</b>              | 2.29                      | <0.0001 |
| <b>Bone marrow stromal antigen 2</b>                                                 | 2.0                       | 0.0012  |
| Ras-related protein Rab-27A                                                          | 0.3                       | 0.1515  |
| Glomulin                                                                             | 0.29                      | 0.0542  |
| MAGUK p55 subfamily member 5                                                         | 0.28                      | <0.0001 |
| Oligophrenin-1                                                                       | 0.27                      | <0.0001 |
| Gap junction alpha-3 protein                                                         | 0.255                     | 0.1772  |
| Latrophilin-3                                                                        | 0.25                      | 0.0282  |
| Ankyrin repeat and sterile alpha motif domain-containing protein 1B                  | 0.25                      | 0.0045  |
| Nebulin-related-anchoring protein                                                    | 0.21                      | 0.0300  |
| Autophagy-related protein 12                                                         | 0.2                       | 0.0599  |
| Beta-1,3-glucosyltransferase                                                         | 0.15                      | 0.0008  |
| Disintegrin and metalloproteinase domain-containing protein 23                       | 0.1                       | 0.0036  |
| Ig gamma-1 chain C region                                                            | 0.1                       | 0.0106  |
| Coilin                                                                               | 0.08                      | 0.0003  |
| U2 small nuclear ribonucleoprotein auxiliary factor 35 kDa subunit-related protein 1 | 0.075                     | 0.0034  |
| A-kinase anchor protein 10, mitochondrial                                            | 0.045                     | 0.0033  |
| Negative elongation factor B                                                         | 0.03                      | <0.0001 |

**Online-Table IV**

| Insulin effect |                                                                                                    | Palmitoylation candidates: Peptide >=2 |             |                    |
|----------------|----------------------------------------------------------------------------------------------------|----------------------------------------|-------------|--------------------|
|                | Also found in 1st screen                                                                           |                                        |             |                    |
|                | Not found in 1st screen                                                                            |                                        |             |                    |
| Protein ID     | Description                                                                                        | Ratio (+/- Insulin)                    | STDEV (+/-) | Number of Peptides |
| 1A25_HUMAN     | HLA class I histocompatibility antigen, A-25 alpha chain OS=Homo sapiens GN=HLA-A PE=2 SV=1        | 1.62                                   | 0.1513      | 7                  |
| 1A34_HUMAN     | HLA class I histocompatibility antigen, A-34 alpha chain OS=Homo sapiens GN=HLA-A PE=1 SV=1        | 1.25                                   | 0.1426      | 59                 |
| 1A69_HUMAN     | HLA class I histocompatibility antigen, A-69 alpha chain OS=Homo sapiens GN=HLA-A PE=1 SV=2        | 1.24                                   | 0.1544      | 48                 |
| 1B07_HUMAN     | HLA class I histocompatibility antigen, B-7 alpha chain OS=Homo sapiens GN=HLA-B PE=1 SV=3         | 1.27                                   | 0.1094      | 80                 |
| 1B08_HUMAN     | HLA class I histocompatibility antigen, B-8 alpha chain OS=Homo sapiens GN=HLA-B PE=1 SV=1         | 1.28                                   | 0.1208      | 76                 |
| 1B15_HUMAN     | HLA class I histocompatibility antigen, B-15 alpha chain OS=Homo sapiens GN=HLA-B PE=1 SV=2        | 1.32                                   | 0.1227      | 71                 |
| 1B27_HUMAN     | HLA class I histocompatibility antigen, B-27 alpha chain OS=Homo sapiens GN=HLA-B PE=1 SV=2        | 1.68                                   | 0.1139      | 16                 |
| 1B35_HUMAN     | HLA class I histocompatibility antigen, B-35 alpha chain OS=Homo sapiens GN=HLA-B PE=1 SV=1        | 1.35                                   | 0.1052      | 71                 |
| 1B38_HUMAN     | HLA class I histocompatibility antigen, B-38 alpha chain OS=Homo sapiens GN=HLA-B PE=2 SV=1        | 1.3                                    | 0.1204      | 74                 |
| 1B40_HUMAN     | HLA class I histocompatibility antigen, B-40 alpha chain OS=Homo sapiens GN=HLA-B PE=1 SV=1        | 1.33                                   | 0.127       | 77                 |
| 1B41_HUMAN     | HLA class I histocompatibility antigen, B-41 alpha chain OS=Homo sapiens GN=HLA-B PE=1 SV=1        | 1.31                                   | 0.126       | 79                 |
| 1B44_HUMAN     | HLA class I histocompatibility antigen, B-44 alpha chain OS=Homo sapiens GN=HLA-B PE=1 SV=1        | 1.31                                   | 0.1144      | 55                 |
| 1B47_HUMAN     | HLA class I histocompatibility antigen, B-47 alpha chain OS=Homo sapiens GN=HLA-B PE=2 SV=1        | 1.33                                   | 0.1259      | 65                 |
| 1B48_HUMAN     | HLA class I histocompatibility antigen, B-48 alpha chain OS=Homo sapiens GN=HLA-B PE=1 SV=1        | 1.37                                   | 0.1222      | 98                 |
| 1B49_HUMAN     | HLA class I histocompatibility antigen, B-49 alpha chain OS=Homo sapiens GN=HLA-B PE=2 SV=2        | 1.32                                   | 0.13        | 63                 |
| 1B51_HUMAN     | HLA class I histocompatibility antigen, B-51 alpha chain OS=Homo sapiens GN=HLA-B PE=1 SV=1        | 1.33                                   | 0.1084      | 61                 |
| 1B54_HUMAN     | HLA class I histocompatibility antigen, B-54 alpha chain OS=Homo sapiens GN=HLA-B PE=2 SV=1        | 1.37                                   | 0.1221      | 56                 |
| 1B73_HUMAN     | HLA class I histocompatibility antigen, B-73 alpha chain OS=Homo sapiens GN=HLA-B PE=1 SV=1        | 1.67                                   | 0.1217      | 12                 |
| 1B82_HUMAN     | HLA class I histocompatibility antigen, B-82 alpha chain OS=Homo sapiens GN=HLA-B PE=2 SV=1        | 1.3                                    | 0.1235      | 64                 |
| 1C01_HUMAN     | HLA class I histocompatibility antigen, Cw-1 alpha chain OS=Homo sapiens GN=HLA-C PE=2 SV=1        | 1.22                                   | 0.0815      | 37                 |
| 1C02_HUMAN     | HLA class I histocompatibility antigen, Cw-2 alpha chain OS=Homo sapiens GN=HLA-C PE=1 SV=1        | 1.33                                   | 0.0999      | 74                 |
| 1C03_HUMAN     | HLA class I histocompatibility antigen, Cw-3 alpha chain OS=Homo sapiens GN=HLA-C PE=1 SV=2        | 1.26                                   | 0.1073      | 51                 |
| 1C04_HUMAN     | HLA class I histocompatibility antigen, Cw-4 alpha chain OS=Homo sapiens GN=HLA-C PE=1 SV=1        | 1.34                                   | 0.1121      | 43                 |
| 1C06_HUMAN     | HLA class I histocompatibility antigen, Cw-6 alpha chain OS=Homo sapiens GN=HLA-C PE=1 SV=2        | 1.08                                   | 0.0813      | 12                 |
| 1C07_HUMAN     | HLA class I histocompatibility antigen, Cw-7 alpha chain OS=Homo sapiens GN=HLA-C PE=1 SV=3        | 1.21                                   | 0.1061      | 54                 |
| 1C12_HUMAN     | HLA class I histocompatibility antigen, Cw-12 alpha chain OS=Homo sapiens GN=HLA-C PE=1 SV=2       | 1.3                                    | 0.1186      | 61                 |
| 1C15_HUMAN     | HLA class I histocompatibility antigen, Cw-15 alpha chain OS=Homo sapiens GN=HLA-C PE=1 SV=1       | 1.27                                   | 0.1067      | 54                 |
| 1C17_HUMAN     | HLA class I histocompatibility antigen, Cw-17 alpha chain OS=Homo sapiens GN=HLA-C PE=1 SV=1       | 1.39                                   | 0.1197      | 83                 |
| 1C18_HUMAN     | HLA class I histocompatibility antigen, Cw-18 alpha chain OS=Homo sapiens GN=HLA-C PE=2 SV=1       | 1.27                                   | 0.0993      | 47                 |
| 4F2_HUMAN      | 4F2 cell-surface antigen heavy chain OS=Homo sapiens GN=SLC3A2 PE=1 SV=3                           | 0.77                                   | 0.0643      | 4                  |
| A16L1_HUMAN    | Autophagy-related protein 16-1 OS=Homo sapiens GN=ATG16L1 PE=1 SV=2                                | 7.51                                   | <0.0001     | 2                  |
| AAAT_HUMAN     | Neutral amino acid transporter B(0) OS=Homo sapiens GN=SLC1A5 PE=1 SV=2                            | 1.32                                   | 0.1575      | 13                 |
| ADA10_HUMAN    | Disintegrin and metalloproteinase domain-containing protein 10 OS=Homo sapiens GN=ADAM10 PE=1 SV=1 | 0.93                                   | 0.1589      | 29                 |
| ADA17_HUMAN    | Disintegrin and metalloproteinase domain-containing protein 17 OS=Homo sapiens GN=ADAM17 PE=1 SV=1 | 0.93                                   | 0.1844      | 5                  |
| ADA23_HUMAN    | Disintegrin and metalloproteinase domain-containing protein 23                                     | 0.1                                    | 0.0071      | 2                  |
| ADCYA_HUMAN    | Adenylate cyclase type 10 OS=Homo sapiens GN=ADCY10 PE=1 SV=3                                      | 1.72                                   | 0.1289      | 4                  |
| AKA10_HUMAN    | A-kinase anchor protein 10, mitochondrial                                                          | 0.045                                  | <0.0001     | 2                  |
| AL1A1_HUMAN    | Retinal dehydrogenase 1 OS=Homo sapiens GN=ALDH1A1 PE=1 SV=2                                       | 1.07                                   | 0.21        | 7                  |
| AL1B1_HUMAN    | Aldehyde dehydrogenase X, mitochondrial OS=Homo sapiens GN=ALDH1B1 PE=1 SV=3                       | 1.59                                   | 0.08        | 20                 |
| ANGP2_HUMAN    | Angiopoietin-2 OS=Homo sapiens GN=ANGPT2 PE=1 SV=1                                                 | 2                                      | 0.2439      | 3                  |
| ANKZ1_HUMAN    | Ankyrin repeat and zinc finger domain-containing protein 1 OS=Homo sapiens GN=ANKZF1 PE=1 SV=1     | 0.8                                    | 0.0076      | 4                  |

| Insulin effect |                                                                                                         | Palmitoylation candidates: Peptide >=2 |             |                    |
|----------------|---------------------------------------------------------------------------------------------------------|----------------------------------------|-------------|--------------------|
|                | Also found in 1st screen                                                                                |                                        |             |                    |
|                | Not found in 1st screen                                                                                 |                                        |             |                    |
| Protein ID     | Description                                                                                             | Ratio (+/- Insulin)                    | STDEV (+/-) | Number of Peptides |
| ANS1B_HUMAN    | Ankyrin repeat and sterile alpha motif domain-containing protein 1B                                     | 0.25                                   | 0.0465      | 2                  |
| ANTR2_HUMAN    | Anthrax toxin receptor 2 OS=Homo sapiens GN=ANTXR2 PE=1 SV=5                                            | 0.89                                   | 0.05        | 20                 |
| AP2M1_HUMAN    | AP-2 complex subunit mu OS=Homo sapiens GN=AP2M1 PE=1 SV=2                                              | 0.95                                   | 0.23        | 4                  |
| ARL15_HUMAN    | ADP-ribosylation factor-like protein 15 OS=Homo sapiens GN=ARL15 PE=1 SV=1                              | 1                                      | 0.1724      | 12                 |
| ARVC_HUMAN     | Armadillo repeat protein deleted in velo-cardio-facial syndrome OS=Homo sapiens GN=ARVCF PE=1 SV=1      | 1.15                                   | 0.1072      | 38                 |
| AT11A_HUMAN    | Probable phospholipid-transporting ATPase 1H OS=Homo sapiens GN=ATP11A PE=2 SV=3                        | 0.7                                    | <0.0001     | 2                  |
| ATG12_HUMAN    | Autophagy-related protein 12                                                                            | 0.2                                    | 0.1073      | 2                  |
| ATG3_HUMAN     | Ubiquitin-like-conjugating enzyme ATG3 OS=Homo sapiens GN=ATG3 PE=1 SV=1                                | 0.94                                   | 0.0463      | 7                  |
| ATG7_HUMAN     | Ubiquitin-like modifier-activating enzyme ATG7 OS=Homo sapiens GN=ATG7 PE=1 SV=1                        | 1.02                                   | 0.1426      | 13                 |
| ATX7_HUMAN     | Ataxin-7                                                                                                | 19.33                                  | <0.0001     | 5                  |
| AUP1_HUMAN     | Ancient ubiquitous protein 1 OS=Homo sapiens GN=AUP1 PE=1 SV=1                                          | 0.87                                   | 0.0992      | 18                 |
| B3GLT_HUMAN    | Beta-1,3-glucosyltransferase                                                                            | 0.15                                   | 0.1183      | 4                  |
| B4GT1_HUMAN    | Beta-1,4-galactosyltransferase 1 OS=Homo sapiens GN=B4GALT1 PE=1 SV=5                                   | 1.07                                   | 0.08        | 5                  |
| B4GT5_HUMAN    | Beta-1,4-galactosyltransferase 5 OS=Homo sapiens GN=B4GALT5 PE=2 SV=1                                   | 1.13                                   | 0.05        | 2                  |
| BAZ1B_HUMAN    | Tyrosine-protein kinase BAZ1B OS=Homo sapiens GN=BAZ1B PE=1 SV=2                                        | 1.07                                   | 0.0177      | 3                  |
| BCAM_HUMAN     | Basal cell adhesion molecule OS=Homo sapiens GN=BCAM PE=1 SV=2                                          | 1.02                                   | 0.1205      | 13                 |
| BET1_HUMAN     | BET1 homolog OS=Homo sapiens GN=BET1 PE=1 SV=1                                                          | 1.12                                   | 0.1011      | 11                 |
| BET1L_HUMAN    | BET1-like protein OS=Homo sapiens GN=BET1L PE=1 SV=1                                                    | 1.3                                    | 0.181       | 2                  |
| BST2_HUMAN     | Bone marrow stromal antigen 2 OS=Homo sapiens GN=BST2 PE=1 SV=1                                         | 2.01                                   | 0.0681      | 3                  |
| BTF3_HUMAN     | Transcription factor BTF3 OS=Homo sapiens GN=BTF3 PE=1 SV=1                                             | 1.55                                   | 0.0388      | 2                  |
| C1QBP_HUMAN    | Complement component 1 Q subcomponent-binding protein, mitochondrial OS=Homo sapiens GN=C1QBP PE=1 SV=1 | 0.88                                   | 0.1074      | 17                 |
| CA131_HUMAN    | Uncharacterized protein C1orf131 OS=Homo sapiens GN=C1orf131 PE=1 SV=3                                  | 49.42                                  | <0.0001     | 2                  |
| CALX_HUMAN     | Calnexin OS=Homo sapiens GN=CANX PE=1 SV=2                                                              | 1.13                                   | 0.0393      | 8                  |
| CAN5_HUMAN     | Calpain-5 OS=Homo sapiens GN=CAPN5 PE=2 SV=2                                                            | 1.04                                   | 0.1099      | 18                 |
| CATB_HUMAN     | Cathepsin B OS=Homo sapiens GN=CTSB PE=1 SV=3                                                           | 0.97                                   | 0.0636      | 14                 |
| CATZ_HUMAN     | Cathepsin Z OS=Homo sapiens GN=CTSZ PE=1 SV=1                                                           | 1.47                                   | 0.2263      | 6                  |
| CAV1_HUMAN     | Caveolin-1 OS=Homo sapiens GN=CAV1 PE=1 SV=4                                                            | 1.54                                   | 0.354       | 51                 |
| CAV2_HUMAN     | Caveolin-2 OS=Homo sapiens GN=CAV2 PE=1 SV=2                                                            | 1.58                                   | 0.1221      | 89                 |
| CBPD_HUMAN     | Carboxypeptidase D OS=Homo sapiens GN=CPD PE=1 SV=2                                                     | 0.94                                   | 0.0183      | 2                  |
| CBR3_HUMAN     | Carbonyl reductase [NADPH] 3 OS=Homo sapiens GN=CBR3 PE=1 SV=3                                          | 0.94                                   | 0.146       | 6                  |
| CCNY_HUMAN     | Cyclin-Y OS=Homo sapiens GN=CCNY PE=1 SV=2                                                              | 0.95                                   | 0.0655      | 11                 |
| CCYL1_HUMAN    | Cyclin-Y-like protein 1 OS=Homo sapiens GN=CCYL1 PE=1 SV=2                                              | 1.03                                   | 0.03        | 6                  |
| CD151_HUMAN    | CD151 antigen OS=Homo sapiens GN=CD151 PE=1 SV=3                                                        | 0.69                                   | 0.0753      | 7                  |
| CD276_HUMAN    | CD276 antigen OS=Homo sapiens GN=CD276 PE=1 SV=1                                                        | 1.08                                   | 0.0464      | 5                  |
| CD44_HUMAN     | CD44 antigen OS=Homo sapiens GN=CD44 PE=1 SV=3                                                          | 0.87                                   | 0.0562      | 88                 |
| CD63_HUMAN     | CD63 antigen OS=Homo sapiens GN=CD63 PE=1 SV=2                                                          | 1.5                                    | 0.0604      | 8                  |
| CD81_HUMAN     | CD81 antigen OS=Homo sapiens GN=CD81 PE=1 SV=1                                                          | 1.11                                   | 0.059       | 10                 |
| CD82_HUMAN     | CD82 antigen OS=Homo sapiens GN=CD82 PE=1 SV=1                                                          | 1.01                                   | 0.0309      | 3                  |
| CD9_HUMAN      | CD9 antigen OS=Homo sapiens GN=CD9 PE=1 SV=4                                                            | 1                                      | 0.0805      | 16                 |
| CDK1_HUMAN     | Cell division protein kinase 1 OS=Homo sapiens GN=CDK1 PE=1 SV=2                                        | 1.35                                   | 0.05        | 2                  |
| CF125_HUMAN    | Uncharacterized protein C6orf125 OS=Homo sapiens GN=C6orf125 PE=1 SV=1                                  | 0.9                                    | 0.1045      | 14                 |
| CHD2_HUMAN     | Chromodomain-helicase-DNA-binding protein 2 OS=Homo sapiens GN=CHD2 PE=1 SV=2                           | 0.61                                   | <0.0001     | 2                  |
| CHD3_HUMAN     | Chromodomain-helicase-DNA-binding protein 3 OS=Homo sapiens GN=CHD3 PE=1 SV=3                           | 0.81                                   | 0.16        | 2                  |

| Insulin effect |                                                                                                                 | Palmitoylation candidates: Peptide >=2 |             |                    |
|----------------|-----------------------------------------------------------------------------------------------------------------|----------------------------------------|-------------|--------------------|
|                |                                                                                                                 | Also found in 1st screen               |             |                    |
|                |                                                                                                                 | Not found in 1st screen                |             |                    |
| Protein ID     | Description                                                                                                     | Ratio (+/- Insulin)                    | STDEV (+/-) | Number of Peptides |
| CISD1_HUMAN    | CDGSH iron-sulfur domain-containing protein 1 OS=Homo sapiens GN=CISD1 PE=1 SV=1                                | 0.83                                   | 0.2273      | 5                  |
| CJ058_HUMAN    | UPF0765 protein C10orf58 OS=Homo sapiens GN=C10orf58 PE=1 SV=3                                                  | 1.06                                   | 0.1025      | 18                 |
| CK059_HUMAN    | RhoA activator C11orf59 OS=Homo sapiens GN=C11orf59 PE=1 SV=2                                                   | 0.97                                   | 0.0843      | 78                 |
| CKAP4_HUMAN    | Cytoskeleton-associated protein 4 OS=Homo sapiens GN=CKAP4 PE=1 SV=2                                            | 0.97                                   | 0.1243      | 27                 |
| CKLF7_HUMAN    | CKLF-like MARVEL transmembrane domain-containing protein 7 OS=Homo sapiens GN=CMTM7 PE=2 SV=1                   | 0.99                                   | 0.0963      | 3                  |
| CLAP1_HUMAN    | CLIP-associating protein 1 OS=Homo sapiens GN=CLASP1 PE=1 SV=1                                                  | 0.87                                   | <0.0001     | 2                  |
| CLC14_HUMAN    | C-type lectin domain family 14 member A OS=Homo sapiens GN=CLEC14A PE=1 SV=1                                    | 1.1                                    | 0.1088      | 52                 |
| CLD11_HUMAN    | Claudin-11 OS=Homo sapiens GN=CLDN11 PE=1 SV=2                                                                  | 0.88                                   | 0.1205      | 14                 |
| CLD5_HUMAN     | Claudin-5 OS=Homo sapiens GN=CLDN5 PE=1 SV=1                                                                    | 1.64                                   | 0.1957      | 23                 |
| CLGN_HUMAN     | Calmegin OS=Homo sapiens GN=CLGN PE=1 SV=1                                                                      | 0.69                                   | 0.0029      | 3                  |
| COIL_HUMAN     | Coilin OS=Homo sapiens GN=COIL PE=1 SV=1                                                                        | 0.08                                   | 0.0221      | 3                  |
| CP4X1_HUMAN    | Cytochrome P450 4X1 OS=Homo sapiens GN=CYP4X1 PE=2 SV=1                                                         | 1.55                                   | <0.0001     | 2                  |
| CPSF1_HUMAN    | Cleavage and polyadenylation specificity factor subunit 1 OS=Homo sapiens GN=CPSF1 PE=1 SV=2                    | 0.95                                   | 0.1657      | 2                  |
| CPSM_HUMAN     | Carbamoyl-phosphate synthase [ammonia], mitochondrial OS=Homo sapiens GN=CPS1 PE=1 SV=2                         | 1.22                                   | 0.0777      | 2                  |
| CTDS1_HUMAN    | Carboxy-terminal domain RNA polymerase II polypeptide A small phosphatase 1 OS=Homo sapiens GN=CTDSP1 PE=1 SV=1 | 1.02                                   | 0.2438      | 6                  |
| CTL1_HUMAN     | Choline transporter-like protein 1 OS=Homo sapiens GN=SLC44A1 PE=1 SV=1                                         | 0.85                                   | 0.0681      | 10                 |
| CTL2_HUMAN     | Choline transporter-like protein 2 OS=Homo sapiens GN=SLC44A2 PE=1 SV=3                                         | 1.4                                    | 0.0845      | 12                 |
| CTND1_HUMAN    | Catenin delta-1 OS=Homo sapiens GN=CTNND1 PE=1 SV=1                                                             | 0.93                                   | 0.141       | 35                 |
| CXA3_HUMAN     | Gap junction alpha-3 protein OS=Homo sapiens GN=GJA3 PE=1 SV=4                                                  | 0.255                                  | 0.3536      | 2                  |
| CYB5B_HUMAN    | Cytochrome b5 type B OS=Homo sapiens GN=CYB5B PE=1 SV=2                                                         | 1.11                                   | 0.1064      | 16                 |
| CYC_HUMAN      | Cytochrome c OS=Homo sapiens GN=CYCS PE=1 SV=2                                                                  | 0.95                                   | 0.0472      | 10                 |
| DAG1_HUMAN     | Dystroglycan OS=Homo sapiens GN=DAG1 PE=1 SV=2                                                                  | 1                                      | 0.1836      | 17                 |
| DCBD1_HUMAN    | Discoidin, CUB and LCCL domain-containing protein 1 OS=Homo sapiens GN=DCBLD1 PE=2 SV=2                         | 0.89                                   | 0.1472      | 2                  |
| DCNL3_HUMAN    | DCN1-like protein 3 OS=Homo sapiens GN=DCUN1D3 PE=2 SV=1                                                        | 1.21                                   | 0.2106      | 5                  |
| DESM_HUMAN     | Desmin OS=Homo sapiens GN=DES PE=1 SV=3                                                                         | 0.8                                    | 0.11        | 10                 |
| DNJC5_HUMAN    | DnaJ homolog subfamily C member 5 OS=Homo sapiens GN=DNAJC5 PE=1 SV=1                                           | 1.02                                   | 0.0804      | 4                  |
| DOC2A_HUMAN    | Double C2-like domain-containing protein alpha OS=Homo sapiens GN=DOC2A PE=1 SV=5                               | 0.53                                   | 0.0711      | 2                  |
| DPB1_HUMAN     | HLA class II histocompatibility antigen, DP beta 1 chain OS=Homo sapiens GN=HLA-DPB1 PE=1 SV=1                  | 1.02                                   | 0.0476      | 2                  |
| DPPA2_HUMAN    | Developmental pluripotency-associated protein 2 OS=Homo sapiens GN=DPPA2 PE=2 SV=2                              | 34.73                                  | <0.0001     | 2                  |
| DTNA_HUMAN     | Dystrobrevin alpha OS=Homo sapiens GN=DTNA PE=1 SV=2                                                            | 1.01                                   | 0.0733      | 4                  |
| DUS23_HUMAN    | Dual specificity protein phosphatase 23 OS=Homo sapiens GN=DUSP23 PE=1 SV=1                                     | 0.94                                   | 0.094       | 24                 |
| ECE1_HUMAN     | Endothelin-converting enzyme 1 OS=Homo sapiens GN=ECE1 PE=1 SV=2                                                | 1.26                                   | 0.1569      | 144                |
| EFHD2_HUMAN    | EF-hand domain-containing protein D2 OS=Homo sapiens GN=EFHD2 PE=1 SV=1                                         | 1.33                                   | 0.1771      | 3                  |
| EFR3A_HUMAN    | Protein EFR3 homolog A OS=Homo sapiens GN=EFR3A PE=1 SV=2                                                       | 1.01                                   | 0.0838      | 7                  |
| EGLN_HUMAN     | Endoglin OS=Homo sapiens GN=ENG PE=1 SV=2                                                                       | 1.22                                   | 0.0712      | 5                  |
| EPCR_HUMAN     | Endothelial protein C receptor OS=Homo sapiens GN=PROCR PE=1 SV=1                                               | 1.16                                   | 0.0765      | 24                 |
| ERF1_HUMAN     | Eukaryotic peptide chain release factor subunit 1 OS=Homo sapiens GN=ETF1 PE=1 SV=3                             | 0.99                                   | 0.11        | 2                  |
| ERGI1_HUMAN    | Endoplasmic reticulum-Golgi intermediate compartment protein 1 OS=Homo sapiens GN=ERGIC1 PE=1 SV=1              | 1.06                                   | 0.0734      | 5                  |
| ERGI3_HUMAN    | Endoplasmic reticulum-Golgi intermediate compartment protein 3 OS=Homo sapiens GN=ERGIC3 PE=1 SV=1              | 1.13                                   | 0.23        | 27                 |
| ERO1A_HUMAN    | ERO1-like protein alpha OS=Homo sapiens GN=ERO1L PE=1 SV=2                                                      | 1.03                                   | 0.06        | 14                 |
| ERP44_HUMAN    | Endoplasmic reticulum resident protein 44 OS=Homo sapiens GN=ERP44 PE=1 SV=1                                    | 1.58                                   | 0.0919      | 5                  |



| Insulin effect |                                                                                                    | Palmitoylation candidates: Peptide >=2 |             |                    |
|----------------|----------------------------------------------------------------------------------------------------|----------------------------------------|-------------|--------------------|
|                | Also found in 1st screen                                                                           |                                        |             |                    |
|                | Not found in 1st screen                                                                            |                                        |             |                    |
| Protein ID     | Description                                                                                        | Ratio (+/- Insulin)                    | STDEV (+/-) | Number of Peptides |
| F108B_HUMAN    | Abhydrolase domain-containing protein FAM108B1 OS=Homo sapiens GN=FAM108B1 PE=2 SV=1               | 1.07                                   | 0.027       | 18                 |
| F16P2_HUMAN    | Fructose-1,6-bisphosphatase isozyme 2 OS=Homo sapiens GN=FBP2 PE=1 SV=2                            | 7.02                                   | 0.9151      | 2                  |
| F1711_HUMAN    | Protein FAM171A1 OS=Homo sapiens GN=FAM171A1 PE=1 SV=1                                             | 0.77                                   | 0.0544      | 4                  |
| F176A_HUMAN    | Protein FAM176A OS=Homo sapiens GN=FAM176A PE=2 SV=1                                               | 1.16                                   | 0.0255      | 2                  |
| F184A_HUMAN    | Protein FAM184A OS=Homo sapiens GN=FAM184A PE=2 SV=3                                               | 0.92                                   | 0.03        | 2                  |
| FA49B_HUMAN    | Protein FAM49B OS=Homo sapiens GN=FAM49B PE=1 SV=1                                                 | 0.89                                   | 0.082       | 2                  |
| FABP5_HUMAN    | Fatty acid-binding protein, epidermal OS=Homo sapiens GN=FABP5 PE=1 SV=3                           | 0.65                                   | 0.0488      | 9                  |
| FAS_HUMAN      | Fatty acid synthase OS=Homo sapiens GN=FASN PE=1 SV=3                                              | 0.98                                   | 0.1335      | 7                  |
| FBL1_HUMAN     | Filamin-binding LIM protein 1 OS=Homo sapiens GN=FBLIM1 PE=1 SV=2                                  | 1.07                                   | 0.1         | 23                 |
| FBLN3_HUMAN    | EGF-containing fibulin-like extracellular matrix protein 1 OS=Homo sapiens GN=EFEMP1 PE=1 SV=2     | 2.29                                   | 0.18        | 25                 |
| FIG4_HUMAN     | Polyphosphoinositide phosphatase OS=Homo sapiens GN=FIG4 PE=1 SV=1                                 | 79.9                                   | 3.4522      | 3                  |
| FLOT1_HUMAN    | Flotillin-1 OS=Homo sapiens GN=FLOT1 PE=1 SV=3                                                     | 1.19                                   | 0.1845      | 172                |
| FLOT2_HUMAN    | Flotillin-2 OS=Homo sapiens GN=FLOT2 PE=1 SV=2                                                     | 1.32                                   | 0.1934      | 75                 |
| FPRP_HUMAN     | Prostaglandin F2 receptor negative regulator OS=Homo sapiens GN=PTGFRN PE=1 SV=2                   | 1.3                                    | 0.1751      | 6                  |
| FUBP3_HUMAN    | Far upstream element-binding protein 3 OS=Homo sapiens GN=FUBP3 PE=1 SV=2                          | 0.94                                   | 0.0743      | 3                  |
| FYN_HUMAN      | Tyrosine-protein kinase Fyn OS=Homo sapiens GN=FYN PE=1 SV=3                                       | 1.14                                   | 0.2         | 12                 |
| GALT1_HUMAN    | Polypeptide N-acetylgalactosaminyltransferase 1 OS=Homo sapiens GN=GALNT1 PE=1 SV=1                | 1.1                                    | 0.1452      | 44                 |
| GAPR1_HUMAN    | Golgi-associated plant pathogenesis-related protein 1 OS=Homo sapiens GN=GLIPR2 PE=1 SV=3          | 1.36                                   | 0.1288      | 3                  |
| GDF5_HUMAN     | Growth/differentiation factor 5 OS=Homo sapiens GN=GDF5 PE=1 SV=3                                  | 0.2                                    | 0.0044      | 4                  |
| GLCE_HUMAN     | D-glucuronyl C5-epimerase OS=Homo sapiens GN=GLCE PE=1 SV=3                                        | 1.03                                   | 0.045       | 40                 |
| GLMN_HUMAN     | Glomulin                                                                                           | 0.36                                   | 0.4159      | 3                  |
| GLU2B_HUMAN    | Glucosidase 2 subunit beta OS=Homo sapiens GN=PRKCSH PE=1 SV=2                                     | 1                                      | 0.0375      | 3                  |
| GNA11_HUMAN    | Guanine nucleotide-binding protein subunit alpha-11 OS=Homo sapiens GN=GNA11 PE=1 SV=2             | 0.93                                   | 0.081       | 4                  |
| GNA13_HUMAN    | Guanine nucleotide-binding protein subunit alpha-13 OS=Homo sapiens GN=GNA13 PE=1 SV=2             | 0.96                                   | 0.0734      | 71                 |
| GNA14_HUMAN    | Guanine nucleotide-binding protein subunit alpha-14 OS=Homo sapiens GN=GNA14 PE=2 SV=1             | 0.93                                   | 0.1003      | 59                 |
| GNA15_HUMAN    | Guanine nucleotide-binding protein subunit alpha-15 OS=Homo sapiens GN=GNA15 PE=2 SV=2             | 1.01                                   | 0.0365      | 2                  |
| GNAI2_HUMAN    | Guanine nucleotide-binding protein G(i) subunit alpha-2 OS=Homo sapiens GN=GNAI2 PE=1 SV=3         | 0.99                                   | 0.0906      | 78                 |
| GNAO_HUMAN     | Guanine nucleotide-binding protein G(o) subunit alpha                                              | 0.9                                    | 0.07        | 19                 |
| GNAQ_HUMAN     | Guanine nucleotide-binding protein G(q) subunit alpha OS=Homo sapiens GN=GNAQ PE=1 SV=4            | 1.02                                   | 0.1139      | 121                |
| GNPAT_HUMAN    | Dihydroxyacetone phosphate acyltransferase OS=Homo sapiens GN=GNPAT PE=1 SV=1                      | 1.04                                   | 0.1152      | 7                  |
| GOGA7_HUMAN    | Golgin subfamily A member 7 OS=Homo sapiens GN=GOLGA7 PE=1 SV=2                                    | 0.97                                   | 0.1129      | 28                 |
| GOLI4_HUMAN    | Golgi integral membrane protein 4 OS=Homo sapiens GN=GOLIM4 PE=1 SV=1                              | 1.05                                   | 0.1484      | 2                  |
| GPX1_HUMAN     | Glutathione peroxidase 1 OS=Homo sapiens GN=GPX1 PE=1 SV=4                                         | 1.18                                   | 0.0954      | 42                 |
| GPX4_HUMAN     | Phospholipid hydroperoxide glutathione peroxidase, mitochondrial OS=Homo sapiens GN=GPX4 PE=1 SV=3 | 1.05                                   | 0.0945      | 13                 |
| GPX8_HUMAN     | Probable glutathione peroxidase 8 OS=Homo sapiens GN=GPX8 PE=1 SV=2                                | 0.95                                   | 0.0386      | 29                 |
| GRIK2_HUMAN    | Glutamate receptor, ionotropic kainate 2 OS=Homo sapiens GN=GRIK2 PE=1 SV=1                        | 1.23                                   | 0.0357      | 2                  |
| GSLG1_HUMAN    | Golgi apparatus protein 1 OS=Homo sapiens GN=GLG1 PE=1 SV=2                                        | 1.18                                   | 0.322       | 43                 |
| HDAC1_HUMAN    | Histone deacetylase 1 OS=Homo sapiens GN=HDAC1 PE=1 SV=1                                           | 1.04                                   | 0.02        | 4                  |
| HLA_G_HUMAN    | HLA class I histocompatibility antigen, alpha chain G OS=Homo sapiens GN=HLA-G PE=1 SV=1           | 1.3                                    | 0.0527      | 14                 |
| HM13_HUMAN     | Minor histocompatibility antigen H13 OS=Homo sapiens GN=HM13 PE=1 SV=1                             | 0.67                                   | 0.1315      | 2                  |
| I5P1_HUMAN     | Type I inositol-1,4,5-trisphosphate 5-phosphatase OS=Homo sapiens GN=INPP5A PE=2 SV=1              | 1.36                                   | 0.8192      | 3                  |
| ICAM2_HUMAN    | Intercellular adhesion molecule 2 OS=Homo sapiens GN=ICAM2 PE=1 SV=2                               | 1.05                                   | 0.2317      | 21                 |
| IF2G_HUMAN     | Eukaryotic translation initiation factor 2 subunit 3 OS=Homo sapiens GN=EIF2S3 PE=1 SV=3           | 1.42                                   | 0.28        | 24                 |

| Insulin effect |                                                                                                          | Palmitoylation candidates: Peptide >=2 |             |                    |
|----------------|----------------------------------------------------------------------------------------------------------|----------------------------------------|-------------|--------------------|
|                | Also found in 1st screen                                                                                 |                                        |             |                    |
|                | Not found in 1st screen                                                                                  |                                        |             |                    |
| Protein ID     | Description                                                                                              | Ratio (+/- Insulin)                    | STDEV (+/-) | Number of Peptides |
| IFM1_HUMAN     | Interferon-induced transmembrane protein 1 OS=Homo sapiens GN=IFITM1 PE=1 SV=3                           | 1.13                                   | 0.0174      | 6                  |
| IFM3_HUMAN     | Interferon-induced transmembrane protein 3 OS=Homo sapiens GN=IFITM3 PE=1 SV=2                           | 1.25                                   | 0.0728      | 74                 |
| IGHG1_HUMAN    | Ig gamma-1 chain C region OS=Homo sapiens GN=IGHG1 PE=1 SV=1                                             | 0.1                                    | 0.0212      | 5                  |
| IL6RB_HUMAN    | Interleukin-6 receptor subunit beta OS=Homo sapiens GN=IL6ST PE=1 SV=2                                   | 0.79                                   | 0.1028      | 3                  |
| ITA3_HUMAN     | Integrin alpha-3 OS=Homo sapiens GN=ITGA3 PE=1 SV=4                                                      | 1.1                                    | 0.1037      | 30                 |
| ITA5_HUMAN     | Integrin alpha-5 OS=Homo sapiens GN=ITGA5 PE=1 SV=2                                                      | 0.76                                   | 0.0267      | 8                  |
| ITA6_HUMAN     | Integrin alpha-6 OS=Homo sapiens GN=ITGA6 PE=1 SV=4                                                      | 1.05                                   | 0.0984      | 50                 |
| ITM2B_HUMAN    | Integral membrane protein 2B OS=Homo sapiens GN=ITM2B PE=1 SV=1                                          | 1.27                                   | 0.1274      | 4                  |
| JAK1_HUMAN     | Tyrosine-protein kinase JAK1 OS=Homo sapiens GN=JAK1 PE=1 SV=2                                           | 1.18                                   | 0.0373      | 5                  |
| JAM3_HUMAN     | Junctional adhesion molecule C OS=Homo sapiens GN=JAM3 PE=1 SV=1                                         | 1.19                                   | 0.0889      | 21                 |
| K2013_HUMAN    | Uncharacterized protein KIAA2013 OS=Homo sapiens GN=KIAA2013 PE=2 SV=1                                   | 1.04                                   | 0.0906      | 15                 |
| KANK1_HUMAN    | KN motif and ankyrin repeat domain-containing protein 1 OS=Homo sapiens GN=KANK1 PE=1 SV=3               | 1.45                                   | 0.0424      | 2                  |
| KCNGB4_HUMAN   | Potassium voltage-gated channel subfamily G member 4                                                     | 0.22                                   | 0.1173      | 2                  |
| KIF3B_HUMAN    | Kinesin-like protein KIF3B OS=Homo sapiens GN=KIF3B PE=1 SV=1                                            | 57.4                                   | 5.8934      | 11                 |
| LAMA4_HUMAN    | Laminin subunit alpha-4 OS=Homo sapiens GN=LAMA4 PE=1 SV=4                                               | 0.92                                   | 0.03        | 2                  |
| LAP2_HUMAN     | Protein LAP2 OS=Homo sapiens GN=ERBB2IP PE=1 SV=2                                                        | 1                                      | 0.1801      | 3                  |
| LAPM5_HUMAN    | Lysosomal-associated transmembrane protein 5 OS=Homo sapiens GN=LAPTM5 PE=1 SV=1                         | 0.65                                   | <.0001      | 2                  |
| LCAP_HUMAN     | Leucyl-cystinyl aminopeptidase OS=Homo sapiens GN=LNPEP PE=1 SV=3                                        | 1.01                                   | 0.2122      | 48                 |
| LHPL2_HUMAN    | Lipoma HMGIC fusion partner-like 2 protein OS=Homo sapiens GN=LHFPL2 PE=2 SV=2                           | 1.23                                   | 0.0573      | 7                  |
| LPHN3_HUMAN    | Latrophilin-3 OS=Homo sapiens GN=LPHN3 PE=1 SV=2                                                         | 0.25                                   | 0.0321      | 2                  |
| LRC32_HUMAN    | Leucine-rich repeat-containing protein 32 OS=Homo sapiens GN=LRRC32 PE=1 SV=1                            | 1.79                                   | 0.1272      | 48                 |
| LRC47_HUMAN    | Leucine-rich repeat-containing protein 47 OS=Homo sapiens GN=LRRC47 PE=1 SV=1                            | 1.28                                   | 0.0336      | 2                  |
| LRRC1_HUMAN    | Leucine-rich repeat-containing protein 1 OS=Homo sapiens GN=LRRC1 PE=1 SV=1                              | 1.1                                    | 0.16        | 40                 |
| LYRIC_HUMAN    | Protein LYRIC OS=Homo sapiens GN=MTDH PE=1 SV=2                                                          | 1.48                                   | 0.1365      | 2                  |
| LYVE1_HUMAN    | Lymphatic vessel endothelial hyaluronic acid receptor 1 OS=Homo sapiens GN=LYVE1 PE=1 SV=2               | 2.67                                   | 0.25        | 9                  |
| MA1B1_HUMAN    | Endoplasmic reticulum mannosyl-oligosaccharide 1,2-alpha-mannosidase OS=Homo sapiens GN=MAN1B1 PE=1 SV=2 | 0.97                                   | 0.1031      | 31                 |
| MACF1_HUMAN    | Microtubule-actin cross-linking factor 1, isoforms 1/2/3/5 OS=Homo sapiens GN=MACF1 PE=1 SV=3            | 8.27                                   | <.0001      | 2                  |
| MALD1_HUMAN    | Putative MARVEL domain-containing protein 1 OS=Homo sapiens GN=MARVELD1 PE=5 SV=1                        | 0.89                                   | 0.0491      | 2                  |
| MAML3_HUMAN    | Mastermind-like protein 3 OS=Homo sapiens GN=MAML3 PE=1 SV=3                                             | 50.73                                  | 8.9095      | 2                  |
| MAT2B_HUMAN    | Methionine adenosyltransferase 2 subunit beta OS=Homo sapiens GN=MAT2B PE=1 SV=1                         | 1.07                                   | 0.037       | 2                  |
| MBLC2_HUMAN    | Metallo-beta-lactamase domain-containing protein 2 OS=Homo sapiens GN=MBLAC2 PE=1 SV=3                   | 0.96                                   | 0.0906      | 16                 |
| MENTO_HUMAN    | MLN64 N-terminal domain homolog OS=Homo sapiens GN=STARD3NL PE=1 SV=1                                    | 0.98                                   | 0.0197      | 2                  |
| MGST3_HUMAN    | Microsomal glutathione S-transferase 3 OS=Homo sapiens GN=MGST3 PE=1 SV=1                                | 1.05                                   | 0.0714      | 9                  |
| MINT_HUMAN     | Msx2-interacting protein OS=Homo sapiens GN=SPEN PE=1 SV=1                                               | 1                                      | 0.0158      | 4                  |
| MIRO2_HUMAN    | Mitochondrial Rho GTPase 2 OS=Homo sapiens GN=RHOT2 PE=1 SV=2                                            | 1.01                                   | 0.0553      | 7                  |
| MLEC_HUMAN     | Malectin OS=Homo sapiens GN=MLEC PE=1 SV=1                                                               | 1.12                                   | 0.1437      | 60                 |
| MPP5_HUMAN     | MAGUK p55 subfamily member 5 OS=Homo sapiens GN=MPP5 PE=1 SV=3                                           | 0.28                                   | <.0001      | 2                  |
| MPRD_HUMAN     | Cation-dependent mannose-6-phosphate receptor OS=Homo sapiens GN=M6PR PE=1 SV=1                          | 1.03                                   | 0.2857      | 8                  |
| MREG_HUMAN     | Melanoregulin OS=Homo sapiens GN=MREG PE=1 SV=1                                                          | 0.87                                   | 0.2493      | 3                  |
| MUC18_HUMAN    | Cell surface glycoprotein MUC18 OS=Homo sapiens GN=MCAM PE=1 SV=2                                        | 1.15                                   | 0.1431      | 191                |
| MYCT1_HUMAN    | Myc target protein 1 OS=Homo sapiens GN=MYCT1 PE=2 SV=1                                                  | 1.12                                   | 0.117       | 11                 |
| MYH7B_HUMAN    | Myosin-7B OS=Homo sapiens GN=MYH7B PE=2 SV=2                                                             | 1.14                                   | <.0001      | 2                  |

| Insulin effect |                                                                                                                                                    | Palmitoylation candidates: Peptide >=2 |             |                    |
|----------------|----------------------------------------------------------------------------------------------------------------------------------------------------|----------------------------------------|-------------|--------------------|
|                | Also found in 1st screen                                                                                                                           |                                        |             |                    |
|                | Not found in 1st screen                                                                                                                            |                                        |             |                    |
| Protein ID     | Description                                                                                                                                        | Ratio (+/- Insulin)                    | STDEV (+/-) | Number of Peptides |
| MYOF_HUMAN     | Myoferlin OS=Homo sapiens GN=MYOF PE=1 SV=1                                                                                                        | 1.17                                   | 0.1348      | 11                 |
| NALCN_HUMAN    | Sodium leak channel non-selective protein OS=Homo sapiens GN=NALCN PE=1 SV=1                                                                       | 1.68                                   | 0.2007      | 3                  |
| NCEH1_HUMAN    | Neutral cholesterol ester hydrolase 1 OS=Homo sapiens GN=NCEH1 PE=1 SV=3                                                                           | 1.12                                   | 0.0894      | 8                  |
| NELFB_HUMAN    | Negative elongation factor B                                                                                                                       | 0.03                                   | <0.0001     | 3                  |
| NIPA_HUMAN     | Nuclear-interacting partner of ALK OS=Homo sapiens GN=ZC3HC1 PE=1 SV=1                                                                             | 1.57                                   | 0.2499      | 2                  |
| NOS3_HUMAN     | Nitric oxide synthase, endothelial OS=Homo sapiens GN=NOS3 PE=1 SV=3                                                                               | 1.18                                   | 0.0561      | 2                  |
| NRAP_HUMAN     | Nebulin-related-anchoring protein OS=Homo sapiens GN=NRAP PE=2 SV=2                                                                                | 0.21                                   | 0.0652      | 2                  |
| NRCAM_HUMAN    | Neuronal cell adhesion molecule OS=Homo sapiens GN=NRCAM PE=1 SV=3                                                                                 | 0.74                                   | <0.0001     | 4                  |
| NRP1_HUMAN     | Neuropilin-1 OS=Homo sapiens GN=NRP1 PE=1 SV=3                                                                                                     | 0.96                                   | 0.347       | 20                 |
| NT5D2_HUMAN    | 5'-nucleotidase domain-containing protein 2 OS=Homo sapiens GN=NT5DC2 PE=1 SV=1                                                                    | 1.64                                   | 0.41        | 5                  |
| NUMA1_HUMAN    | Nuclear mitotic apparatus protein 1 OS=Homo sapiens GN=NUMA1 PE=1 SV=2                                                                             | 1.26                                   | 0.0083      | 4                  |
| ODO2_HUMAN     | Dihydrolipoyllysine-residue succinyltransferase component of 2-oxoglutarate dehydrogenase complex, mitochondrial OS=Homo sapiens GN=DLST PE=1 SV=3 | 1.01                                   | 0.09        | 51                 |
| ODP2_HUMAN     | Dihydrolipoyllysine-residue acetyltransferase component of pyruvate dehydrogenase complex, mitochondrial OS=Homo sapiens GN=DLAT PE=1 SV=3         | 0.92                                   | 0.1831      | 95                 |
| ODPX_HUMAN     | Pyruvate dehydrogenase protein X component, mitochondrial OS=Homo sapiens GN=PDHX PE=1 SV=3                                                        | 0.95                                   | 0.16        | 26                 |
| OFD1_HUMAN     | Oral-facial-digital syndrome 1 protein OS=Homo sapiens GN=OFD1 PE=1 SV=1                                                                           | 0.62                                   | 0.0179      | 5                  |
| OPHN1_HUMAN    | Oligophrenin-1 OS=Homo sapiens GN=OPHN1 PE=2 SV=1                                                                                                  | 0.27                                   | <0.0001     | 2                  |
| P4K2A_HUMAN    | Phosphatidylinositol 4-kinase type 2-alpha OS=Homo sapiens GN=PI4K2A PE=1 SV=1                                                                     | 1.03                                   | 0.08        | 78                 |
| P4K2B_HUMAN    | Phosphatidylinositol 4-kinase type 2-beta OS=Homo sapiens GN=PI4K2B PE=1 SV=1                                                                      | 0.89                                   | 0.03        | 5                  |
| PA1B3_HUMAN    | Platelet-activating factor acetylhydrolase IB subunit gamma                                                                                        | 21.02                                  | 7.461       | 3                  |
| PANK4_HUMAN    | Pantothenate kinase 4 OS=Homo sapiens GN=PANK4 PE=1 SV=1                                                                                           | 1.02                                   | 0.0476      | 2                  |
| PBIP1_HUMAN    | Pre-B-cell leukemia transcription factor-interacting protein 1 OS=Homo sapiens GN=PBXIP1 PE=1 SV=1                                                 | 1.04                                   | 0.0182      | 3                  |
| PCD17_HUMAN    | Protocadherin-17 OS=Homo sapiens GN=PCDH17 PE=2 SV=2                                                                                               | 0.675                                  | 0.2407      | 10                 |
| PDL1_HUMAN     | PDZ and LIM domain protein 1 OS=Homo sapiens GN=PDLIM1 PE=1 SV=4                                                                                   | 1.2                                    | 0.1248      | 15                 |
| PECA1_HUMAN    | Platelet endothelial cell adhesion molecule OS=Homo sapiens GN=PECAM1 PE=1 SV=1                                                                    | 1.14                                   | 0.1276      | 84                 |
| PER1_HUMAN     | Peripherin OS=Homo sapiens GN=PRPH PE=1 SV=2                                                                                                       | 0.79                                   | 0.14        | 11                 |
| PLD6_HUMAN     | Phospholipase D6 OS=Homo sapiens GN=PLD6 PE=2 SV=1                                                                                                 | 1.14                                   | 0.0969      | 2                  |
| PLEC_HUMAN     | Plectin OS=Homo sapiens GN=PLEC PE=1 SV=3                                                                                                          | 0.745                                  | 0.17        | 6                  |
| PLP2_HUMAN     | Proteolipid protein 2 OS=Homo sapiens GN=PLP2 PE=1 SV=1                                                                                            | 1                                      | <0.0001     | 2                  |
| PLS1_HUMAN     | Phospholipid scramblase 1 OS=Homo sapiens GN=PLSCR1 PE=1 SV=1                                                                                      | 1.32                                   | 0.2111      | 40                 |
| PLS3_HUMAN     | Phospholipid scramblase 3 OS=Homo sapiens GN=PLSCR3 PE=1 SV=2                                                                                      | 1.01                                   | 0.0478      | 10                 |
| PLXB2_HUMAN    | Plexin-B2 OS=Homo sapiens GN=PLXNB2 PE=1 SV=3                                                                                                      | 1.17                                   | 0.1345      | 7                  |
| PODXL_HUMAN    | Podocalyxin OS=Homo sapiens GN=PODXL PE=1 SV=2                                                                                                     | 0.91                                   | 0.0517      | 11                 |
| PPDE1_HUMAN    | PPPDE peptidase domain-containing protein 1 OS=Homo sapiens GN=PPPDE1 PE=2 SV=1                                                                    | 0.99                                   | 0.0523      | 11                 |
| PPOX_HUMAN     | Protoporphyrinogen oxidase OS=Homo sapiens GN=PPOX PE=1 SV=1                                                                                       | 1.08                                   | 0.0856      | 2                  |
| PRDX5_HUMAN    | Peroxiredoxin-5, mitochondrial OS=Homo sapiens GN=PRDX5 PE=1 SV=3                                                                                  | 1.01                                   | 0.0752      | 26                 |
| PRDX6_HUMAN    | Peroxiredoxin-6 OS=Homo sapiens GN=PRDX6 PE=1 SV=3                                                                                                 | 1.1                                    | 0.1702      | 106                |
| PSMD1_HUMAN    | 26S proteasome non-ATPase regulatory subunit 1 OS=Homo sapiens GN=PSMD1 PE=1 SV=2                                                                  | 0.97                                   | 0.076       | 11                 |
| PSN1_HUMAN     | Presenilin-1 OS=Homo sapiens GN=PSEN1 PE=1 SV=1                                                                                                    | 0.69                                   | 0.0004      | 2                  |
| PTTG_HUMAN     | Pituitary tumor-transforming gene 1 protein-interacting protein OS=Homo sapiens GN=PTTG1IP PE=1 SV=1                                               | 0.95                                   | 0.0654      | 9                  |
| PVR_HUMAN      | Poliovirus receptor OS=Homo sapiens GN=PVR PE=1 SV=2                                                                                               | 0.79                                   | 0.0556      | 24                 |
| PVRL2_HUMAN    | Poliovirus receptor-related protein 2 OS=Homo sapiens GN=PVRL2 PE=1 SV=1                                                                           | 1.02                                   | 0.0887      | 12                 |
| QOR_HUMAN      | Quinone oxidoreductase                                                                                                                             | 0.42                                   | 0.4243      | 2                  |



| Insulin effect |                                                                                                                 | Palmitoylation candidates: Peptide >=2 |             |                    |
|----------------|-----------------------------------------------------------------------------------------------------------------|----------------------------------------|-------------|--------------------|
|                | Also found in 1st screen                                                                                        |                                        |             |                    |
|                | Not found in 1st screen                                                                                         |                                        |             |                    |
| Protein ID     | Description                                                                                                     | Ratio (+/- Insulin)                    | STDEV (+/-) | Number of Peptides |
| SEP15_HUMAN    | 15 kDa selenoprotein OS=Homo sapiens GN=SEP15 PE=1 SV=3                                                         | 1.24                                   | 0.122       | 7                  |
| SERC1_HUMAN    | Serine incorporator 1 OS=Homo sapiens GN=SERINC1 PE=1 SV=1                                                      | 0.81                                   | 0.0732      | 4                  |
| SFPQ_HUMAN     | Splicing factor, proline- and glutamine-rich OS=Homo sapiens GN=SFPQ PE=1 SV=2                                  | 0.98                                   | 0.0935      | 10                 |
| SNP23_HUMAN    | Synaptosomal-associated protein 23 OS=Homo sapiens GN=SNAP23 PE=1 SV=1                                          | 1.08                                   | 0.104       | 36                 |
| SORC2_HUMAN    | VPS10 domain-containing receptor SorCS2 OS=Homo sapiens GN=SORCS2 PE=1 SV=3                                     | 1                                      | 0.0158      | 4                  |
| SPY4_HUMAN     | Protein sprouty homolog 4 OS=Homo sapiens GN=SPRY4 PE=1 SV=2                                                    | 0.84                                   | <0.0001     | 2                  |
| STML3_HUMAN    | Stomatin-like protein 3 OS=Homo sapiens GN=STOML3 PE=1 SV=1                                                     | 1.03                                   | 0.0191      | 4                  |
| STOM_HUMAN     | Erythrocyte band 7 integral membrane protein OS=Homo sapiens GN=STOM PE=1 SV=3                                  | 1.06                                   | 0.1218      | 152                |
| STT3A_HUMAN    | Dolichyl-diphosphooligosaccharide--protein glycosyltransferase subunit STT3A OS=Homo sapiens GN=STT3A PE=1 SV=2 | 1.01                                   | 0.0281      | 3                  |
| STX10_HUMAN    | Syntaxin-10 OS=Homo sapiens GN=STX10 PE=1 SV=1                                                                  | 1.08                                   | 0.0519      | 4                  |
| STX11_HUMAN    | Syntaxin-11 OS=Homo sapiens GN=STX11 PE=1 SV=1                                                                  | 1.62                                   | 0.2406      | 7                  |
| STX12_HUMAN    | Syntaxin-12 OS=Homo sapiens GN=STX12 PE=1 SV=1                                                                  | 0.99                                   | 0.0718      | 57                 |
| STX6_HUMAN     | Syntaxin-6 OS=Homo sapiens GN=STX6 PE=1 SV=1                                                                    | 1.22                                   | 0.2237      | 19                 |
| STX8_HUMAN     | Syntaxin-8 OS=Homo sapiens GN=STX8 PE=1 SV=2                                                                    | 1.09                                   | 0.1151      | 17                 |
| SURF4_HUMAN    | Surfeit locus protein 4 OS=Homo sapiens GN=SURF4 PE=1 SV=3                                                      | 1                                      | 0.0307      | 2                  |
| SUSD5_HUMAN    | Sushi domain-containing protein 5 OS=Homo sapiens GN=SUSD5 PE=1 SV=3                                            | 0.79                                   | 0.0625      | 7                  |
| SYAC_HUMAN     | Alanyl-tRNA synthetase, cytoplasmic OS=Homo sapiens GN=AARS PE=1 SV=2                                           | 1.25                                   | 0.0397      | 3                  |
| SYCP1_HUMAN    | Synaptonemal complex protein 1 OS=Homo sapiens GN=SYCP1 PE=1 SV=2                                               | 1.19                                   | 0.0181      | 2                  |
| SYWC_HUMAN     | Tryptophanyl-tRNA synthetase, cytoplasmic OS=Homo sapiens GN=WARS PE=1 SV=2                                     | 1.24                                   | 0.11        | 40                 |
| T126A_HUMAN    | Transmembrane protein 126A OS=Homo sapiens GN=TMEM126A PE=1 SV=1                                                | 1.02                                   | 0.06        | 3                  |
| T184C_HUMAN    | Transmembrane protein 184C OS=Homo sapiens GN=TMEM184C PE=2 SV=2                                                | 0.97                                   | 0.0664      | 4                  |
| T4S1_HUMAN     | Transmembrane 4 L6 family member 1 OS=Homo sapiens GN=TM4SF1 PE=1 SV=1                                          | 2.3                                    | 0.8429      | 3                  |
| TBB8_HUMAN     | Tubulin beta-8 chain OS=Homo sapiens GN=TUBB8 PE=1 SV=2                                                         | 1.5                                    | 0.13        | 68                 |
| TBB8B_HUMAN    | Tubulin beta-8 chain B OS=Homo sapiens PE=1 SV=1                                                                | 1.96                                   | 0.14        | 56                 |
| TCRG1_HUMAN    | Transcription elongation regulator 1 OS=Homo sapiens GN=TCERG1 PE=1 SV=2                                        | 22.88                                  | 14.2309     | 3                  |
| TEKT1_HUMAN    | Tektin-1 OS=Homo sapiens GN=TEKT1 PE=2 SV=1                                                                     | 0.92                                   | 0.0428      | 2                  |
| TFR1_HUMAN     | Transferrin receptor protein 1 OS=Homo sapiens GN=TFRC PE=1 SV=2                                                | 0.94                                   | 0.1065      | 77                 |
| THIC_HUMAN     | Acetyl-CoA acetyltransferase, cytosolic OS=Homo sapiens GN=ACAT2 PE=1 SV=2                                      | 1.02                                   | 0.0648      | 2                  |
| THIK_HUMAN     | 3-ketoacyl-CoA thiolase, peroxisomal OS=Homo sapiens GN=ACAA1 PE=1 SV=2                                         | 1.16                                   | 0.1248      | 15                 |
| THIL_HUMAN     | Acetyl-CoA acetyltransferase, mitochondrial OS=Homo sapiens GN=ACAT1 PE=1 SV=1                                  | 0.79                                   | 0.0528      | 68                 |
| THTR_HUMAN     | Thiosulfate sulfurtransferase OS=Homo sapiens GN=TST PE=1 SV=4                                                  | 1.04                                   | 0.186       | 14                 |
| TM109_HUMAN    | Transmembrane protein 109 OS=Homo sapiens GN=TMEM109 PE=1 SV=1                                                  | 1.22                                   | 0.1528      | 5                  |
| TM222_HUMAN    | Transmembrane protein 222 OS=Homo sapiens GN=TMEM222 PE=1 SV=2                                                  | 0.94                                   | 0.0043      | 2                  |
| TM50A_HUMAN    | Transmembrane protein 50A OS=Homo sapiens GN=TMEM50A PE=1 SV=1                                                  | 0.92                                   | 0.0283      | 2                  |
| TM63A_HUMAN    | Transmembrane protein 63A OS=Homo sapiens GN=TMEM63A PE=1 SV=3                                                  | 1.23                                   | 0.15        | 2                  |
| TMEDA_HUMAN    | Transmembrane emp24 domain-containing protein 10 OS=Homo sapiens GN=TMED10 PE=1 SV=2                            | 1.1                                    | 0.0077      | 3                  |
| TMM98_HUMAN    | Transmembrane protein 98 OS=Homo sapiens GN=TMEM98 PE=2 SV=1                                                    | 0.96                                   | 0.0223      | 5                  |
| TMTC3_HUMAN    | Transmembrane and TPR repeat-containing protein 3 OS=Homo sapiens GN=TMTC3 PE=1 SV=2                            | 0.81                                   | 0.16        | 2                  |
| TMX1_HUMAN     | Thioredoxin-related transmembrane protein 1 OS=Homo sapiens GN=TMX1 PE=1 SV=1                                   | 0.98                                   | 0.1         | 49                 |
| TMX3_HUMAN     | Protein disulfide-isomerase TMX3 OS=Homo sapiens GN=TMX3 PE=1 SV=2                                              | 1.04                                   | 0.1         | 53                 |
| TMX4_HUMAN     | Thioredoxin-related transmembrane protein 4 OS=Homo sapiens GN=TMX4 PE=1 SV=1                                   | 1.08                                   | 0.093       | 23                 |
| TNR12_HUMAN    | Tumor necrosis factor receptor superfamily member 12A OS=Homo sapiens GN=TNFRSF12A PE=1 SV=1                    | 0.81                                   | 0.1654      | 11                 |

| Insulin effect |                                                                                                                         | Palmitoylation candidates: Peptide >=2 |             |                    |
|----------------|-------------------------------------------------------------------------------------------------------------------------|----------------------------------------|-------------|--------------------|
|                | Also found in 1st screen                                                                                                |                                        |             |                    |
|                | Not found in 1st screen                                                                                                 |                                        |             |                    |
| Protein ID     | Description                                                                                                             | Ratio (+/- Insulin)                    | STDEV (+/-) | Number of Peptides |
| TPBG_HUMAN     | Trophoblast glycoprotein OS=Homo sapiens GN=TPBG PE=1 SV=1                                                              | 0.91                                   | 0.0291      | 6                  |
| TPPC3_HUMAN    | Trafficking protein particle complex subunit 3 OS=Homo sapiens GN=TRAPPC3 PE=1 SV=1                                     | 1.29                                   | 0.1141      | 80                 |
| TR10B_HUMAN    | Tumor necrosis factor receptor superfamily member 10B OS=Homo sapiens GN=TNFRSF10B PE=1 SV=1                            | 0.99                                   | 0.064       | 13                 |
| TRXR1_HUMAN    | Thioredoxin reductase 1, cytoplasmic OS=Homo sapiens GN=TXNRD1 PE=1 SV=3                                                | 0.93                                   | 0.07        | 2                  |
| TSN11_HUMAN    | Tetraspanin-11                                                                                                          | 0.9                                    | 0.2518      | 2                  |
| TSN18_HUMAN    | Tetraspanin-18 OS=Homo sapiens GN=TSPAN18 PE=2 SV=1                                                                     | 1.67                                   | 0.297       | 2                  |
| TSN3_HUMAN     | Tetraspanin-3 OS=Homo sapiens GN=TSPAN3 PE=2 SV=1                                                                       | 0.94                                   | 0.08        | 2                  |
| TSN6_HUMAN     | Tetraspanin-6 OS=Homo sapiens GN=TSPAN6 PE=1 SV=1                                                                       | 1.04                                   | 0.0717      | 9                  |
| TSN9_HUMAN     | Tetraspanin-9 OS=Homo sapiens GN=TSPAN9 PE=1 SV=1                                                                       | 1.58                                   | <0.0001     | 2                  |
| TTL12_HUMAN    | Tubulin--tyrosine ligase-like protein 12 OS=Homo sapiens GN=TLL12 PE=1 SV=2                                             | 1.09                                   | 0.0538      | 11                 |
| TTYH3_HUMAN    | Protein tweety homolog 3 OS=Homo sapiens GN=TTYH3 PE=1 SV=3                                                             | 1.36                                   | 0.16        | 13                 |
| U2AFL_HUMAN    | U2 small nuclear ribonucleoprotein auxiliary factor 35 kDa subunit-related protein 1 OS=Homo sapiens GN=ZRSR1 PE=2 SV=2 | 0.075                                  | <0.0001     | 2                  |
| UB2G1_HUMAN    | Ubiquitin-conjugating enzyme E2 G1 OS=Homo sapiens GN=UBE2G1 PE=1 SV=3                                                  | 0.75                                   | 0.0569      | 10                 |
| UB2L3_HUMAN    | Ubiquitin-conjugating enzyme E2 L3 OS=Homo sapiens GN=UBE2L3 PE=1 SV=1                                                  | 0.62                                   | 0.0489      | 78                 |
| UB2L6_HUMAN    | Ubiquitin/ISG15-conjugating enzyme E2 L6 OS=Homo sapiens GN=UBE2L6 PE=1 SV=4                                            | 1.94                                   | 0.1247      | 3                  |
| UB2V1_HUMAN    | Ubiquitin-conjugating enzyme E2 variant 1 OS=Homo sapiens GN=UBE2V1 PE=1 SV=2                                           | 0.92                                   | 0.0976      | 3                  |
| UBA5_HUMAN     | Ubiquitin-like modifier-activating enzyme 5 OS=Homo sapiens GN=UBA5 PE=1 SV=1                                           | 0.93                                   | 0.18        | 21                 |
| UBC12_HUMAN    | NEDD8-conjugating enzyme Ubc12 OS=Homo sapiens GN=UBE2M PE=1 SV=1                                                       | 0.68                                   | 0.0699      | 28                 |
| UBE2K_HUMAN    | Ubiquitin-conjugating enzyme E2 K OS=Homo sapiens GN=UBE2K PE=1 SV=3                                                    | 0.71                                   | 0.0946      | 61                 |
| UBE2N_HUMAN    | Ubiquitin-conjugating enzyme E2 N OS=Homo sapiens GN=UBE2N PE=1 SV=1                                                    | 0.84                                   | 0.1223      | 70                 |
| UBE2T_HUMAN    | Ubiquitin-conjugating enzyme E2 T OS=Homo sapiens GN=UBE2T PE=1 SV=1                                                    | 0.74                                   | 0.0511      | 8                  |
| UCRI_HUMAN     | Cytochrome b-c1 complex subunit Rieske, mitochondrial OS=Homo sapiens GN=UQCRCF1 PE=1 SV=2                              | 1.05                                   | 0.1373      | 12                 |
| UFC1_HUMAN     | Ubiquitin-fold modifier-conjugating enzyme 1 OS=Homo sapiens GN=UFC1 PE=1 SV=3                                          | 0.99                                   | 0.0823      | 19                 |
| VAMP3_HUMAN    | Vesicle-associated membrane protein 3 OS=Homo sapiens GN=VAMP3 PE=1 SV=3                                                | 1.78                                   | 2.5892      | 12                 |
| VAMP4_HUMAN    | Vesicle-associated membrane protein 4 OS=Homo sapiens GN=VAMP4 PE=1 SV=2                                                | 1.1                                    | 0.1435      | 18                 |
| VAMP5_HUMAN    | Vesicle-associated membrane protein 5 OS=Homo sapiens GN=VAMP5 PE=1 SV=1                                                | 1.19                                   | 0.0953      | 40                 |
| VAMP7_HUMAN    | Vesicle-associated membrane protein 7 OS=Homo sapiens GN=VAMP7 PE=1 SV=3                                                | 1.46                                   | 0.0635      | 37                 |
| VATA_HUMAN     | V-type proton ATPase catalytic subunit A OS=Homo sapiens GN=ATP6V1A PE=1 SV=2                                           | 0.95                                   | 0.0602      | 20                 |
| VDAC3_HUMAN    | Voltage-dependent anion-selective channel protein 3 OS=Homo sapiens GN=VDAC3 PE=1 SV=1                                  | 1.05                                   | 0.1134      | 32                 |
| VIGLN_HUMAN    | Vigilin OS=Homo sapiens GN=HDLBP PE=1 SV=2                                                                              | 1.06                                   | 0.203       | 3                  |
| VWF_HUMAN      | von Willebrand factor OS=Homo sapiens GN=VWF PE=1 SV=3                                                                  | 1.61                                   | 0.51        | 17                 |
| ZBED5_HUMAN    | Zinc finger BED domain-containing protein 5 OS=Homo sapiens GN=ZBED5 PE=1 SV=2                                          | 33.1                                   | 8.2681      | 5                  |
| ZDH13_HUMAN    | Palmitoyltransferase ZDHHC13 OS=Homo sapiens GN=ZDHHC13 PE=2 SV=3                                                       | 1.16                                   | 0.1187      | 10                 |
| ZN426_HUMAN    | Zinc finger protein 426 OS=Homo sapiens GN=ZNF426 PE=2 SV=1                                                             | 1                                      | 0.0177      | 2                  |
| ZNT1_HUMAN     | Zinc transporter 1 OS=Homo sapiens GN=SLC30A1 PE=1 SV=3                                                                 | 0.85                                   | <0.0001     | 4                  |
